1 **A centrosome asymmetry switch in fly neural stem cells**

2  
3

4 Emmanuel Gallaud<sup>1,\*</sup>, Anjana Ramdas Nair<sup>1,3,\*</sup>, Arnaud Monnard<sup>1,2</sup>, Priyanka Singh<sup>1,4</sup>, Tri Thanh  
5 Pham<sup>1,2</sup>, David Salvador Garcia<sup>1,5</sup>, Alexia Ferrand<sup>1</sup> & Clemens Cabernard<sup>2,#</sup>

6  
7

8 <sup>1</sup> Biozentrum, University of Basel

9 Klingelbergstrasse 50-70

10 CH-4056 Basel, Switzerland

11

12 <sup>2</sup> Department of Biology, University of Washington

13 24 Kincaid Hall

14 Seattle, WA 98105, USA

15

16 <sup>3</sup> Present address:

17 NYU Abu Dhabi, Saadiyat Campus

18 Abu Dhabi, United Arab Emirates

19

20 <sup>4</sup> Present address:

21 Department of Bioscience & Bioengineering, Indian Institute of Technology Jodhpur

22 NH 65, Nagour Road, Karwar, Jodhpur District,

23 Rajasthan, India 342037.

24

25 <sup>5</sup> Present address:

26 Division of Cell Biology, MRC Laboratory of Molecular Biology

27 Francis Crick Avenue

28 Cambridge CB2 0QH, UK.

29

30

31 \* These authors contributed equally

32

33 # Correspondence to: [ccabern@uw.edu](mailto:ccabern@uw.edu)

34 **Centrosomes, the main microtubule organizing centers (MTOCs) of metazoan cells, contain an older**  
35 **‘mother’ and a younger ‘daughter’ centriole. Stem cells either inherit the mother or daughter**  
36 **centriole, providing a mechanism for biased delivery of cell fate determinants. However, the**  
37 **molecular mechanisms regulating centrosome asymmetry and biased centrosome segregation are**  
38 **unclear. Using 3D-Structured Illumination Microscopy (3D-SIM), we here identify a centrosome**  
39 **asymmetry switch in fly neural stem cells. We show that the mitotic kinase Polo and its substrate, the**  
40 **centriolar protein Centrobin (Cnb), relocalize from the mother to the forming daughter centriole in**  
41 **mitosis. Polo’s relocalization depends on both Centrobin and Wdr62, and compromising the switch**  
42 **perturbs biased interphase MTOC activity. We propose that this asymmetry switch is necessary to**  
43 **form molecular and functional asymmetric centrosomes and the neuroblast specific retention of the**  
44 **daughter centriole-containing centrosome. The centrosome asymmetry switch might also explain the**  
45 **differences in centrosome inheritance across stem cell systems.**

46

47

48

## 49 **Introduction**

50 Centrosomes consist of a pair of centrioles, embedded in structured layers of pericentriolar material (PCM)<sup>1</sup>.  
51 A single ‘daughter’ centriole is formed around a central cartwheel and at right angles to the existing older  
52 ‘mother’ centriole<sup>2,3</sup>. Based on this replication cycle, centrioles - and thereby centrosomes - are intrinsically  
53 asymmetric. Stem cells have been observed to inherit either the mother or daughter centriole-containing  
54 centrosome (mother and daughter centrosome, hereafter). For instance, vertebrate neural stem cells or  
55 *Drosophila* male germline stem cells obtain the older mother centrosome, raising the possibility that it  
56 contains factors necessary to maintain stemness<sup>4,5</sup>. However, *Drosophila* female germline or neural stem  
57 cells, called neuroblasts, inherit the daughter centrosome<sup>6-8</sup>. The role of centrosomal age in determining  
58 cell fate and the difference in centriole inheritance among different stem cell types is unclear.

59 *Drosophila* neuroblasts represent an ideal genetically tractable system to investigate centrosome  
60 asymmetry<sup>9</sup>. Neuroblast centrosomes are highly asymmetric in interphase; one centrosome is forming an  
61 active MTOC, whereas its sibling remains inactive until entry into mitosis<sup>7,10,11</sup>. The active interphase  
62 MTOC contains the daughter centriole, identifiable with the orthologue of the human daughter centriole-  
63 specific protein Cnb (Cnb<sup>+</sup>)<sup>6</sup>. This biased MTOC activity is regulated by the mitotic kinase Polo (Plk1 in  
64 vertebrates). Polo phosphorylates Cnb, necessary to maintain an active MTOC, tethering the daughter  
65 centriole-containing centrosome to the apical interphase cortex. Cortical association ensures that the  
66 daughter centrosome is inherited by the self-renewing neuroblast<sup>6,12</sup> (and Figure S1A). Polo localization  
67 on the apical centrosome is maintained by the microcephaly associated protein Wdr62<sup>13</sup>. The mother  
68 centrosome, separating from the daughter centrosome in interphase, downregulates Polo and MTOC  
69 activity through Pericentrin (PCNT)-like protein (Plp) and Bld10 (Cep135 in vertebrates)<sup>14,15</sup>. The lack of  
70 MTOC activity prevents the mother centrosome from engaging with the apical cell cortex; it randomly  
71 migrates through the cytoplasm until centrosome maturation in prophase establishes a second MTOC near  
72 the basal cortex, ensuring its segregation into the differentiating ganglion mother cell (GMC). Later in  
73 mitosis, the mother centrosome also accumulates Cnb<sup>7,10,11,14</sup> (and Figure S1A). Although several  
74 centrosomal proteins have been described to be enriched on either the mother or daughter centriole

75 containing centrosome<sup>6,13,16</sup>, it is unknown when and how centrioles acquire a unique molecular identity.  
76 Here, we describe a novel centrosome asymmetry switch manifested in the dynamic transitioning of both  
77 Polo and Cnb from the mother to the daughter centriole. This switch, occurring in mitosis, is necessary for  
78 subsequent asymmetric MTOC activity, centrosome positioning and biased centrosome segregation.

79

## 80 **Results**

81 We used 3D-Structured Illumination Microscopy (3D-SIM), which has approximately twice the spatial  
82 resolution of standard confocal microscopy, to investigate the centriole duplication cycle and to determine  
83 the onset of molecular centrosome asymmetry in third instar neuroblasts (Figure 1A). In vertebrate cells,  
84 centriole duplication occurs in S-phase (reviewed in<sup>3,17,18</sup>) but it is unclear whether this is also the case in  
85 *Drosophila* neural stem cells. Using 3D-SIM on fixed larval neuroblasts, we found that Sas-6 and Ana-2  
86 were localized to the centriolar cartwheel whereas Ana-1, Bld10 and Asl form ring-like structures abutting  
87 the centriolar wall (Figure S2A-C).

88 We used Sas-6 and Asl to determine the onset of cartwheel duplication and centriolar wall maturation  
89 during the neuroblast cell cycle. Cell cycle stages were determined based on the organization of the  
90 microtubule network (Figure S1B). Apical and basal interphase neuroblast centrosomes contained two Sas-  
91 6<sup>+</sup> cartwheels but only one Asl<sup>+</sup> centriole. From prometaphase onwards, Asl gradually appeared around the  
92 second cartwheel to form a pair of fully formed centrioles. A similar sequential loading of proteins was  
93 observed in S2-cells<sup>19</sup>. In telophase, centrioles appeared to lose their orthogonal conformation, possibly  
94 because of disengagement. In late telophase, cartwheels duplicated, manifested in the appearance of a third  
95 Sas-6 positive cartwheel (Figure 1B). Based on these data we conclude that centriolar cartwheels are  
96 duplicated in early interphase. The localization of Asl to the centriolar wall starts in early mitosis but is not  
97 completed before the end of mitosis.

98       Centrosome asymmetry is detectable in interphase neuroblasts but when the centrosome, inherited  
99 by the neuroblast, acquires its unique molecular signature is unclear (Figure 2A, C). For instance, Cnb is  
100 localized to the single apical centriole in interphase neuroblasts<sup>6</sup>. Since this centriole forms the template

101 for the formation of the daughter centriole, Cnb must either switch its localization to the newly formed  
102 daughter centriole in mitosis or – in contrast to a previous report<sup>6</sup> – Cnb is localized to the old mother  
103 centriole that is being inherited by the self-renewing neuroblast. To resolve this issue, we analyzed the  
104 localization of YFP::Cnb<sup>6</sup> with 3D-SIM throughout mitosis. As expected, YFP::Cnb was localized with  
105 Asl on the active, apical centrosome in interphase neuroblasts but absent on the basal interphase centrosome  
106 (Figure 2B, D and Figure S2D). Also, most apical prophase centrosomes contained a single Cnb<sup>+</sup> centriole  
107 (dark blue arrowheads in Figure 2B); the basal prophase centrosomes were mostly Cnb<sup>-</sup>. To our surprise,  
108 we also found apical - but never basal - prophase and prometaphase centrosomes where Cnb was localized  
109 on both centrioles (green arrowheads in Figure 2B). However, from metaphase onwards Cnb was  
110 predominantly localized on one centriole only (brown arrowheads in Figure 2B). On the basal centrosome,  
111 Cnb appeared in prophase but was always localized to one centriole only in all subsequent mitotic stages  
112 (Figure 2D and Figure S2D).

113 To better understand Cnb relocalization dynamics, we correlated centriolar age with Cnb localization in  
114 more detail. To this end, we first calculated the Asl intensity ratio between both centrioles (see methods)  
115 from apical and basal centrosomes containing Cnb only on one of the two centrioles (Asl intensity ratio of  
116 Cnb<sup>+</sup>/Cnb<sup>-</sup> from prometaphase until telophase). We detected an inherent asymmetry in Asl intensity,  
117 consistent with the sequential loading of Asl onto the forming daughter centriole: for all centrosomes  
118 containing one Cnb<sup>+</sup> and one Cnb<sup>-</sup> centriole, the Cnb<sup>+</sup> centriole always contained less Asl (Figure 2E). In  
119 addition, this Asl intensity correlated well with the morphology of early mitotic centrioles; the fully formed  
120 centriole always contained more Asl. Thus, we used Asl as a centriolar age marker<sup>19,20</sup> and reanalyzed all  
121 mitotic stages for Cnb localization on the apical centrosome, specifically focusing on stages where Cnb  
122 appeared on both centrioles. We found that in prophase – when Cnb was detectable on both centrioles –  
123 Cnb was predominantly associated with the centriole containing more Asl (the mother centriole) before  
124 switching to the centriole containing less Asl (the daughter centriole) during prometaphase (green  
125 arrowhead in Figure 2B). Cnb was sometimes visible before Asl was robustly recruited to the daughter  
126 centriole (green arrowheads in third column of Figure 2B). From metaphase until mitosis exit, Cnb was

127 strongly enriched or exclusively present on the daughter centriole (Figure 2F, G and Figure S3A-C).  
128 Interestingly, Cnb localization dynamics differed between the apical and basal centrosome; the basal  
129 centrosome contained a single Asl<sup>+</sup>, Cnb<sup>-</sup> centriole in interphase and Cnb appeared on the forming centriole  
130 in prophase (Figure 2D).  
131 From these data, we can conclude the following: (1) centrosome asymmetry is tightly coupled to the  
132 centriole duplication and maturation cycle. (2) On the apical centrosome, Cnb is switching its localization  
133 from the mother to the daughter centriole during prophase to prometaphase. (3) On the basal centrosome,  
134 however, Cnb seems to be recruited directly to the youngest centriole. These observations suggest that  
135 apical neuroblast centrosomes undergo a spatiotemporally controlled ‘asymmetry switch’ in mitosis.

136 To test whether this asymmetry switch also applies to other centrosomal proteins, we analyzed the  
137 localization of Polo (Polo::GFP) and Plp (Plp::EGFP) throughout mitosis; both Polo and Plp were GFP-  
138 tagged at the endogenous locus (<sup>21</sup> and methods). In early prophase neuroblasts and on both centrosomes,  
139 Polo was localized on the existing centriole (Figure 3A, B & <sup>13</sup>). Subsequently, Polo intensity increased on  
140 the forming daughter centriole on both centrosomes and its asymmetric localization peaked in  
141 metaphase/anaphase. Interestingly, the apical centrosome showed a less pronounced asymmetric  
142 distribution in prometaphase compared to the basal centrosome, which could reflect differences in the  
143 relocation mechanism (Figure 3A-C).

144 In contrast to Polo and Cnb, Plp predominantly remained localized on the mother centriole on both  
145 centrosomes, although it increased also on the daughter centriole in late mitosis (Figure S4A-C). Co-  
146 imaging Polo together with Plp, and Cnb with Plp showed that Plp separated from Polo and Cnb in  
147 metaphase and anaphase (Figure 3D, E). These data suggest that similar to Cnb, Polo switches its  
148 localization from the mother to the daughter centriole, whereas Plp remains localized on the mother  
149 centriole. However, in contrast to Cnb, Polo is switching its localization on both centrosomes.

150 Next, we sought to determine the molecular mechanisms underlying this centrosome asymmetry  
151 switch. We analyzed Asl, Polo and Plp localization in neuroblasts depleted for Cnb (*cnb* RNAi) and Wdr62.  
152 Wdr62 is implicated in primary microcephaly <sup>22-24</sup>, and both Cnb and Wdr62 are necessary for the

153 establishment and maintenance of centrosome asymmetry by regulating Polo's and Plp's centrosomal  
154 localization in interphase neuroblasts<sup>12,13</sup>. Lack of Cnb or Wdr62 did not compromise the gradual loading  
155 of Asl onto the newly formed centriole in mitotic neuroblasts (data not shown). However, in the absence of  
156 Cnb and Wdr62, the asymmetric centriolar localization of Polo, especially in prometaphase to anaphase  
157 neuroblasts, was significantly perturbed (Figure 4A-C). Lack of Cnb - but not Wdr62 - also compromised  
158 Polo's asymmetric localization in telophase, suggesting a preferential requirement for Wdr62 in metaphase  
159 and anaphase. Taken together, loss of *cnb* or *wdr62* significantly increased the number of centrosomes with  
160 inverted Polo asymmetry ratios (wild type control: 8.6%; *cnb* RNAi: 40%; *wdr62*: 31.5%; Figure 4D, E).  
161 Plp localization was still highly asymmetric in neuroblasts depleted for Cnb and Wdr62. However, Cnb  
162 depletion decreased, and loss of Wdr62 further increased Plp's asymmetric localization (Figure S5A-D).  
163 We conclude that in mitotic neuroblasts, Cnb has a minor role in promoting the asymmetric localization of  
164 Plp, whereas Wdr62 could have a permissive role in Plp recruitment on the daughter centriole. Taken  
165 together, these data suggest that both Cnb and Wdr62 are implicated in Polo's switch from the mother to  
166 the daughter centriole.

167 Finally, we set out to investigate the consequences of the centrosome asymmetry switch by  
168 preventing the transition of Cnb and Polo from the mother to the daughter centriole. Since our 3D-SIM  
169 data showed Plp to be predominantly associated with the mother centriole, we reasoned that tethering Cnb  
170 to the mother centriole with Plp's PACT domain<sup>25</sup> would compromise the establishment of a Cnb<sup>-</sup> mother  
171 and Cnb<sup>+</sup> daughter centriole. We speculated that Cnb's localization would remain enriched on the mother  
172 or at least become near symmetrically localized between the mother and daughter centriole. Indeed, 3D-  
173 SIM experiments revealed that YFP::Cnb::PACT<sup>12</sup> failed to properly transition from the mother to the  
174 daughter centriole and predominantly remained associated with the mother centriole (Figure S6A, B).  
175 Direct linking of Cnb to centrosomes using the PACT domain (YFP::Cnb::PACT) has also been shown to  
176 convert the inactive mother interphase centrosome into an active MTOC, resulting in the presence of two  
177 active interphase MTOCs<sup>12</sup> (Figure S6C & Movie 1, 2). This result suggested that disrupting the  
178 centrosome asymmetry switch in mitosis impacts MTOC behavior in interphase.

179 To further test this, we developed a nanobody trapping experiment, using the anti-GFP single domain  
180 antibody fragment (vhhGFP4)<sup>26,27</sup> and the PACT domain of Plp<sup>25</sup> to trap GFP- or YFP-tagged proteins on  
181 the mother centriole (Figure S7A-C). We could recapitulate the interphase MTOC phenotype of  
182 YFP::Cnb::PACT by expressing PACT::vhhGFP4 in neuroblasts together with YFP::Cnb; almost 93%  
183 (n=69) showed two active interphase MTOCs (YFP::Cnb expression only: 0%; n = 16; Figure S7D, E &  
184 Movie 3). Conversely, trapping Asl::GFP with PACT::vhhGFP4 on the mother centriole did not cause a  
185 significant MTOC phenotype; 83% of neuroblasts showed normal divisions (n = 104; Figure S7F, G &  
186 Movie 4).

187 Co-expressing a GFP-tagged version of Polo – either a published GFP::Polo transgene<sup>28</sup> or our  
188 endogenously tagged CRISPR Polo::EGFP line – prevented the transitioning of Polo from the mother to  
189 the daughter centriole. 3D-SIM data revealed that Polo::EGFP was predominantly localized to the mother  
190 centriole in prophase and prometaphase. Subsequently, Polo::EGFP was either enriched on the mother or  
191 symmetrically localized from metaphase onwards (Figure 5A,B). This altered localization affected MTOC  
192 activity in third instar neuroblasts; similar to Cnb mislocalization, trapping Polo on the mother centriole  
193 induced the formation of two active interphase MTOCs (GFP::Polo transgene: 84%; n = 31. Polo::EGFP  
194 CRISPR line: 72%; n = 82) (Figure 5C-E, Figure S7H, I & Movie 5-7). Although cell cycle progression  
195 was not affected in these neuroblasts (Figure 5F), we measured a significant misorientation of the mitotic  
196 spindle in early metaphase. However, similar to *bld10*, displaying two active interphase MTOCs also<sup>14</sup>,  
197 mitotic spindles realigned along the apical-basal polarity axis, ensuring normal asymmetric cell divisions  
198 (Figure 5G-J). We hypothesized that preventing the establishment of a clear Polo asymmetry in mitosis  
199 transforms the two centrosomes into apical-like interphase centrosomes. Indeed, 3D-SIM imaging revealed  
200 that both centrioles now contain high levels of centriolar, and diffuse PCM Polo levels as we recently  
201 described for the apical interphase wild type centrosome<sup>13</sup> (Figure 6K,L).

202

203

204



## 205 Discussion

206 Here, we have shown that in *Drosophila* neural stem cells, centrosomes undergo a previously undiscovered  
207 asymmetry switch by transferring centriolar proteins such as Cnb or Polo from the old mother to the young  
208 daughter centriole. This centrosome asymmetry switch is tightly linked to the centriole duplication cycle,  
209 coinciding with the completion of daughter centriole formation in mitosis. In prophase, Cnb and Polo  
210 colocalize on the existing mother centriole but as soon as the daughter centriolar wall appears in  
211 prometaphase, Cnb and Polo are exclusively (in the case of Cnb) or predominantly (in the case of Polo)  
212 localized on the daughter centriole. Interestingly, Cnb behaves differently on the basal centrosome since  
213 the existing mother centriole does not contain any Cnb, appearing only on the forming daughter centriole  
214 in prometaphase. Also, Plp remains predominantly associated with the mother centriole on both the apical  
215 and basal centrosome (Figure 6A, B). Mechanistically, this asymmetry switch could entail a direct  
216 translocation of Cnb and Polo from the mother to the daughter centriole. Alternatively, centriolar proteins  
217 could become up- or downregulated through exchanges with the PCM or cytoplasm. The asymmetry switch  
218 might also be regulated differently on the apical versus basal centrosome. Our data suggest that Polo's  
219 relocalization to the daughter centriole is regulated by both Cnb and Wdr62 since loss of either protein  
220 compromises the enrichment of Polo on the daughter centriole. However, Cnb's relocalization is  
221 independent of Polo; *polo* mutants still show mostly normal Cnb transfer to the daughter centriole (data not  
222 shown).

223 The centrosome asymmetry switch is important for interphase MTOC activity. Using our nanobody  
224 trapping experiment, we could efficiently compromise the transitioning of Polo and Cnb from the mother  
225 to the daughter centriole, with the consequence that both centrosomes retained MTOC activity in interphase.  
226 Although this experiment is performed in the presence of untagged Polo, which is not subject to direct  
227 nanobody trapping and cannot be visualized, the trapping of GFP-tagged Polo alone seems sufficient to  
228 disrupt the normal asymmetric distribution of Polo to compromise biased interphase MTOC activity. This  
229 result is also in agreement with *bld10* mutants which fail to downregulate Polo from the mother centriole,  
230 resulting in the formation of two active interphase MTOCs<sup>14</sup>. Loss of Wdr62 or Cnb also affects Polo's

231 mother – daughter transition. Yet, interphase centrosomes lose their activity in these mutants. *wdr62*  
232 mutants and *cnb* RNAi treated neuroblasts both show low Polo levels in interphase<sup>13</sup>. We thus propose that  
233 in addition to an asymmetric distribution, Polo levels must remain at a certain level to maintain interphase  
234 MTOC activity; high symmetric Polo results in two active interphase MTOCs whereas low symmetric Polo  
235 results in the formation of two inactive centrosomes.

236 Taken together, these results suggest that the centrosome asymmetry switch is necessary to establish two  
237 molecularly distinct centrioles, necessary for the biased MTOC activity in interphase (Figure 6A, B).  
238 Furthermore, the switch also provides a molecular explanation for why the daughter centriole-containing  
239 centrosome remains tethered to the apical neuroblast cortex and is being inherited by the self-renewed  
240 neuroblast. It remains to be tested why neuroblasts implemented such a robust machinery to asymmetrically  
241 segregate the daughter-containing centriole to the self-renewed neuroblast; more refined molecular and  
242 behavioral assays will be necessary to elucidate the developmental and post-developmental consequences  
243 of the centrosome asymmetry switch. The tools and findings reported here will be instrumental in targeted  
244 perturbations of the centrosome asymmetry switch with spatiotemporal precision in defined neuroblast  
245 lineages.

246 Finally, the occurrence of a centrosome asymmetry switch further raises the tantalizing possibility that  
247 centriolar proteins also transfer in other stem cells, potentially providing a mechanistic explanation for the  
248 differences in centriole inheritance across different stem cell systems.

## 249 References

- 250 1. Mennella, V. *et al.* Subdiffraction-resolution fluorescence microscopy reveals a domain of the  
251 centrosome critical for pericentriolar material organization. *Nat. Cell Biol.* **14**, 1159–1168 (2012).
- 252 2. Nigg, E. A. & Raff, J. W. Centrioles, Centrosomes, and Cilia in Health and Disease. *Cell* **139**,  
253 663–678 (2009).
- 254 3. Conduit, P. T., Wainman, A. & Raff, J. W. Centrosome function and assembly in animal cells.  
255 *Nat. Rev. Mol. Cell Biol.* **16**, 611–624 (2015).
- 256 4. Wang, X. *et al.* Asymmetric centrosome inheritance maintains neural progenitors in the neocortex.  
257 *Nature* **461**, 947–955 (2009).
- 258 5. Yamashita, Y. M., Mahowald, A. P., Perlin, J. R. & Fuller, M. T. Asymmetric inheritance of  
259 mother versus daughter centrosome in stem cell division. *Science* **315**, 518–521 (2007).
- 260 6. Januschke, J., Llamazares, S., Reina, J. & Gonzalez, C. Drosophila neuroblasts retain the daughter  
261 centrosome. *Nat Commun* **2**, 243 (2011).
- 262 7. Conduit, P. T. & Raff, J. W. Cnn dynamics drive centrosome size asymmetry to ensure daughter  
263 centriole retention in Drosophila neuroblasts. *Curr. Biol.* **20**, 2187–2192 (2010).
- 264 8. Salzmann, V. *et al.* Centrosome-dependent asymmetric inheritance of the midbody ring in  
265 Drosophila germline stem cell division. **25**, 267–275 (2014).
- 266 9. Gallaud, E., Pham, T. & Cabernard, C. Drosophila melanogaster Neuroblasts: A Model for  
267 Asymmetric Stem Cell Divisions. *Results Probl Cell Differ* **61**, 183–210 (2017).
- 268 10. Rebollo, E. *et al.* Functionally unequal centrosomes drive spindle orientation in asymmetrically  
269 dividing Drosophila neural stem cells. *Dev. Cell* **12**, 467–474 (2007).
- 270 11. Rusan, N. M. & Peifer, M. A role for a novel centrosome cycle in asymmetric cell division. *J Cell*  
271 *Biol* **177**, 13–20 (2007).
- 272 12. Januschke, J. *et al.* Centrobin controls mother–daughter centriole asymmetry in Drosophila  
273 neuroblasts. *Nat. Cell Biol.* **15**, 241–248 (2013).
- 274 13. Ramdas Nair, A. *et al.* The Microcephaly-Associated Protein Wdr62/CG7337 Is Required to  
275 Maintain Centrosome Asymmetry in Drosophila Neuroblasts. *Cell Rep* **14**, 1100–1113 (2016).
- 276 14. Singh, P., Ramdas Nair, A. & Cabernard, C. The Centriolar Protein Bld10/Cep135 Is Required to  
277 Establish Centrosome Asymmetry in Drosophila Neuroblasts. *Curr. Biol.* **24**, 1548–1555 (2014).
- 278 15. Lerit, D. A. & Rusan, N. M. PLP inhibits the activity of interphase centrosomes to ensure their  
279 proper segregation in stem cells. *J Cell Biol* **202**, 1013–1022 (2013).
- 280 16. Lerit, D. A. *et al.* Interphase centrosome organization by the PLP-Cnn scaffold is required for  
281 centrosome function. *J. Cell Biol.* **210**, 79–97 (2015).
- 282 17. Nigg, E. A. & Stearns, T. The centrosome cycle: Centriole biogenesis, duplication and inherent  
283 asymmetries. *Nat. Cell Biol.* **13**, 1154–1160 (2011).
- 284 18. Fu, J., Hagan, I. M. & Glover, D. M. The Centrosome and Its Duplication Cycle. *Cold Spring*  
285 *Harb Perspect Biol* **7**, (2015).
- 286 19. Fu, J. *et al.* Conserved molecular interactions in centriole-to-centrosome conversion. *Nat. Cell*  
287 *Biol.* (2015). doi:10.1038/ncb3274
- 288 20. Novak, Z. A., Conduit, P. T., Wainman, A. & Raff, J. W. Asterless Licenses Daughter Centrioles  
289 to Duplicate for the First Time in Drosophila Embryos. *Current Biology* **24**, 1276–1282 (2014).
- 290 21. Buszczak, M. *et al.* The carnegie protein trap library: a versatile tool for Drosophila developmental  
291 studies. *Genetics* **175**, 1505–1531 (2007).
- 292 22. Nicholas, A. K. *et al.* WDR62 is associated with the spindle pole and is mutated in human  
293 microcephaly. *Nat Genet* **42**, 1010–1014 (2010).
- 294 23. Bacino, C. A., Arriola, L. A., Wiszniewska, J. & Bonnen, P. E. WDR62 missense mutation in a  
295 consanguineous family with primary microcephaly. *American journal of medical genetics. Part A*  
296 **158A**, 622–625 (2012).
- 297 24. Rupp, V., Rauf, S., Naveed, I., Windpassinger, C. & Mir, A. A novel single base pair duplication  
298 in WDR62 causes primary microcephaly. *BMC Med. Genet.* **15**, 107 (2014).

- 299 25. Gillingham, A. K. & Munro, S. The PACT domain, a conserved centrosomal targeting motif in the  
300 coiled-coil proteins AKAP450 and pericentrin. *EMBO Rep.* **1**, 524–529 (2000).
- 301 26. Saerens, D. *et al.* Identification of a Universal VHH Framework to Graft Non-canonical Antigen-  
302 binding Loops of Camel Single-domain Antibodies. *J. Mol. Biol.* **352**, 597–607 (2005).
- 303 27. Caussin, E., Kanca, O. & Affolter, M. Fluorescent fusion protein knockout mediated by anti-  
304 GFP nanobody. *Nat Struct Mol Biol* **19**, 117–121 (2011).
- 305 28. Moutinho Santos, T., Sampaio, P., Amorim, I., Costa, M. & Sunkel, C. E. In vivo localisation of  
306 the mitotic POLO kinase shows a highly dynamic association with the mitotic apparatus during  
307 early embryogenesis in *Drosophila*. *Biology of the Cell* **91**, 585–596 (1999).
- 308 29. Albertson, R. & Doe, C. Q. Dlg, Scrib and Lgl regulate neuroblast cell size and mitotic spindle  
309 asymmetry. *Nat. Cell Biol.* **5**, 166–170 (2003).
- 310 30. Blachon, S. *et al.* A proximal centriole-like structure is present in *Drosophila* spermatids and can  
311 serve as a model to study centriole duplication. *Genetics* **182**, 133–144 (2009).
- 312 31. Stevens, N. R., Dobbelaere, J., Brunk, K., Franz, A. & Raff, J. W. *Drosophila* Ana2 is a conserved  
313 centriole duplication factor. *J. Cell Biol.* **188**, 313–323 (2010).
- 314 32. Megraw, T. L., Kilaru, S., Turner, F. R. & Kaufman, T. C. The centrosome is a dynamic structure  
315 that ejects PCM flares. *Journal of cell science* **115**, 4707–4718 (2002).
- 316 33. Blachon, S. *et al.* *Drosophila* asterless and vertebrate Cep152 Are orthologs essential for centriole  
317 duplication. *Genetics* **180**, 2081–2094 (2008).
- 318 34. Cabernard, C. *et al.* Apical/basal spindle orientation is required for neuroblast homeostasis and  
319 neuronal differentiation in *Drosophila*. *Dev. Cell* **17**, 134–141 (2009).
- 320 35. Gratz, S. J. *et al.* Genome engineering of *Drosophila* with the CRISPR RNA-guided Cas9  
321 nuclease. *Genetics* **194**, 1029–1035 (2013).
- 322 36. Ren, X. *et al.* Enhanced Specificity and Efficiency of the CRISPR/Cas9 System with Optimized  
323 sgRNA Parameters in *Drosophila*. *Cell Rep* **9**, 1151–1162 (2014).
- 324
- 325

326 **Acknowledgements:**

327 We thank members of the Cabernard lab for helpful discussions. We are grateful to Jordan Raff, Nasser  
328 Rusan, Tomer Avidor-Reiss, Cayetano Gonzalez and Chris Doe for flies and antibodies. We would also  
329 like to thank the Imaging Core Facility (IMCF) at the Biozentrum for technical support and the Nigg lab  
330 for providing temporary lab space to E. G. This work was supported by the Swiss National Science  
331 Foundation (SNSF) and start-up funds from the University of Washington. E.G was supported with an  
332 EMBO long-term postdoctoral fellowship (ALTF 378-2015). Stocks obtained from the Bloomington  
333 Drosophila Stock Center (NIH P40OD018537) and the Vienna Drosophila Resource Center (VDRC) were  
334 used in this study.

335

336 **Author contributions:**

337 This study was conceived by A.R.N, P.S, and C.C.  
338 E.G and A.R.N performed most of the experiments with help from P.S.  
339 A. M generated the PACT::vhhGFP4 construct. T.P wrote custom-made Matlab codes and helped with  
340 data analysis. D.S.G generated the Plp CRISPR line and A.F helped with 3D-SIM imaging. E.G, A.R.N  
341 and C.C wrote the paper.

342

343 **Competing financial interests:** The authors declare no competing financial interests.

344

345 **Materials & Correspondence.** Material requests and other inquiries should be directed to  
346 ccabern@uw.edu.

347

348 **Figures**

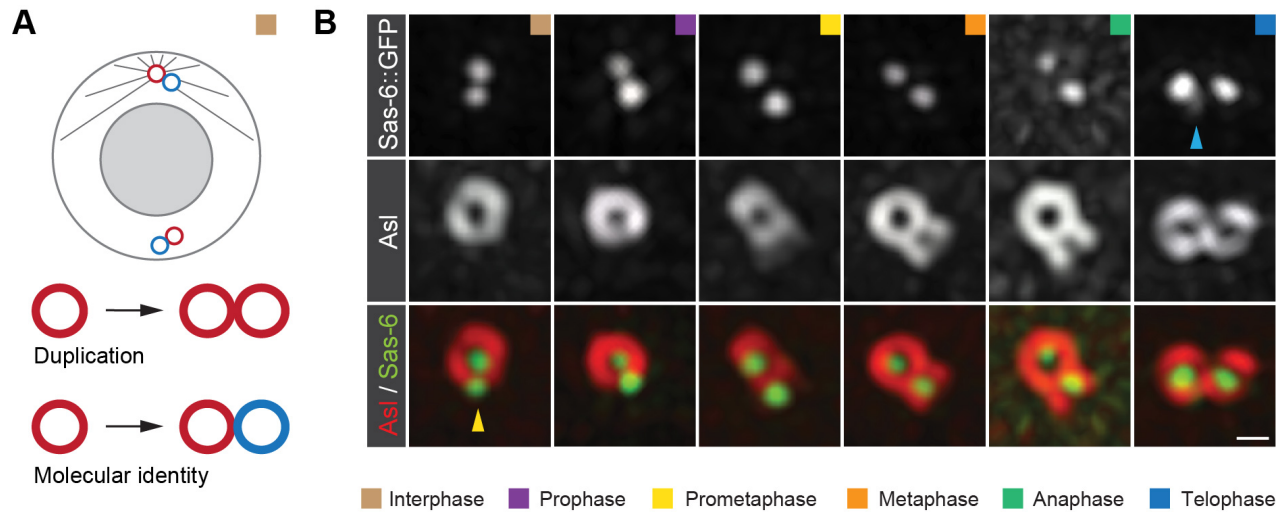

349

350

351 **Figure 1: Neuroblast centriole duplication completes in mitosis**

352 (A) Neuroblast centrosomes are inherently asymmetric in interphase but when neuroblast centrioles  
353 duplicate and acquire a unique molecular identity (indicated by arrow and color switch) is unknown. (B)  
354 Representative interpolated 3D-SIM images of third instar larval neuroblast centrosomes, expressing Sas-  
355 6::GFP (top row; white. Green in merge) and stained for Asl (middle row; white. Merged channels; red).  
356 The yellow arrowhead highlights the cartwheel of the forming centriole. Cartwheel duplication can be  
357 observed at the telophase/interphase transition, concomitantly with centrosome separation (blue  
358 arrowhead). Cell cycle stages are indicated with colored boxes. Scale bar is 0.3  $\mu$ m.

359

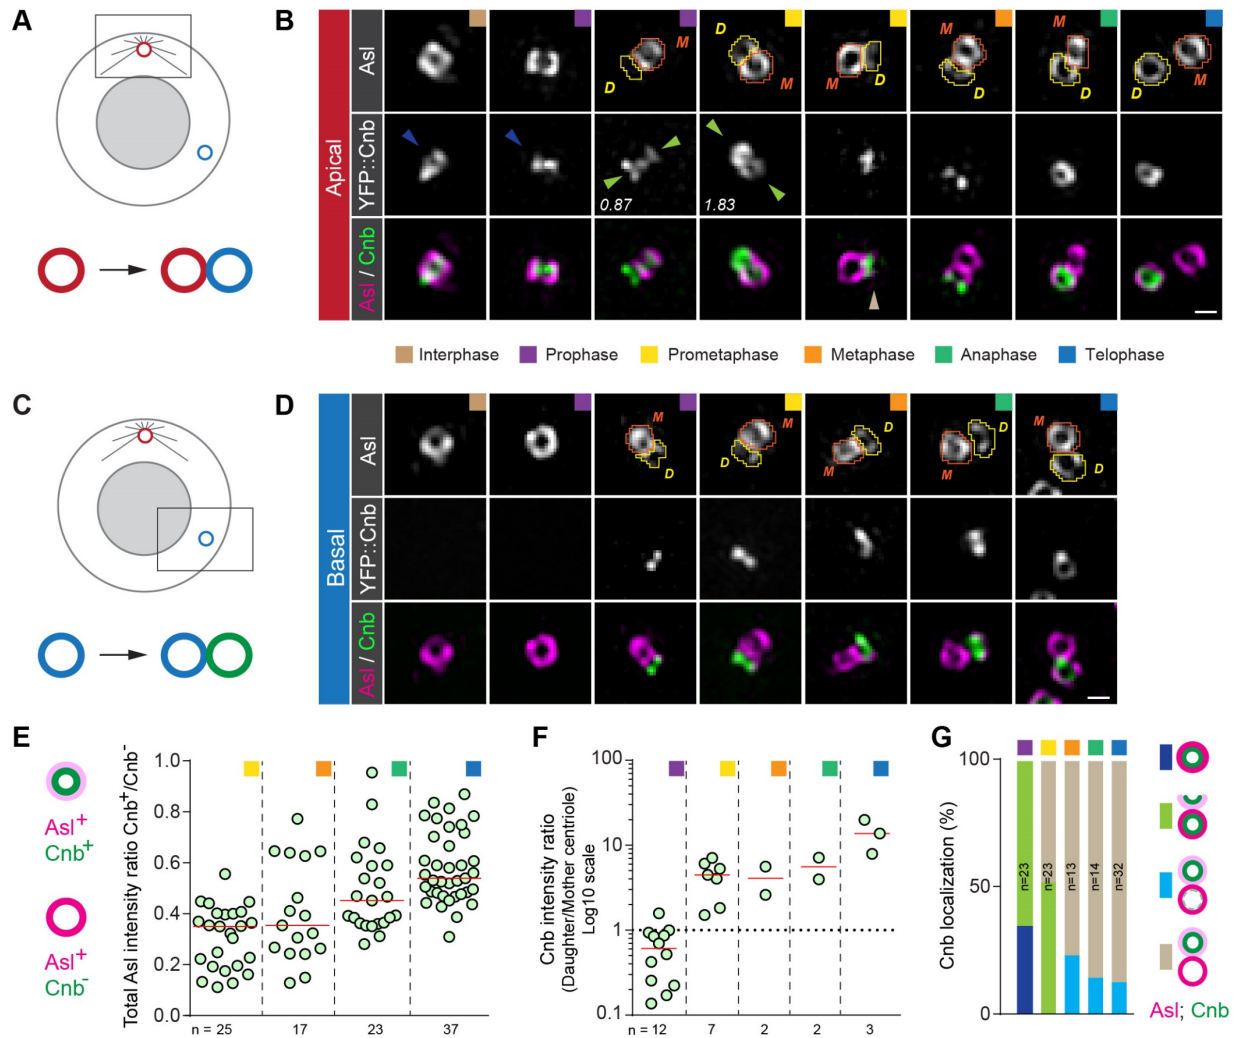

360

361

362 **Figure 2: Cnb switches from the mother to the daughter centriole in early mitosis on the apical**

363 **centrosome**

364 How centriole duplication and molecular asymmetry are coupled is unclear for both the apical (A) and basal

365 (C) centrosome. Representative 3D-SIM images of an apical (A) and basal (D) third instar neuroblast

366 centrosome, expressing YFP::Cnb (middle row; white. Green in merge) and stained for Asl (Top row; white.

367 white. Magenta in merge). Orange and yellow shapes highlight mother and daughter centrioles, respectively.

368 The numbers indicate the total Cnb asymmetry ratios (Daughter/Mother centriole). Colored arrowheads highlight the different stages shown in (G; see also Figure S3B).

369 (E) For prometaphase to telophase centrioles (apical and basal centrosomes combined), containing a single Cnb<sup>+</sup> centriole, total Asl

370

371 intensity of the Cnb<sup>+</sup> (presumably the daughter) centriole was divided by the total Asl intensity of the Cnb<sup>-</sup>  
372 (presumably the mother) centriole. Medians are shown with a red horizontal line. **(F)** Scatter plot showing  
373 total Cnb intensity of the daughter centriole (less Asl), divided by total Cnb intensity on the mother centriole  
374 (more Asl). Only apical centrioles containing Cnb on both centrioles were measured. **(G)** Graph showing  
375 the timeline of Cnb's relocalization to the apical centrosome: the bars show the percentage of neuroblasts  
376 containing a single Cnb<sup>+</sup> centriole (dark blue), Cnb on both centrioles (transition stage; light green),  
377 predominant Cnb localization on the daughter centriole (strong asymmetry; light blue) or in which Cnb is  
378 completely shifted to the daughter centriole (brown) at defined mitotic stages. For this and all subsequent  
379 cartoons: closed and open circles represent completed and incompleting centriole duplications, respectively.  
380 Cell cycle stages are indicated with colored boxes. Scale bar is 0.3  $\mu\text{m}$ . The data presented here were  
381 obtained from five independent experiments.



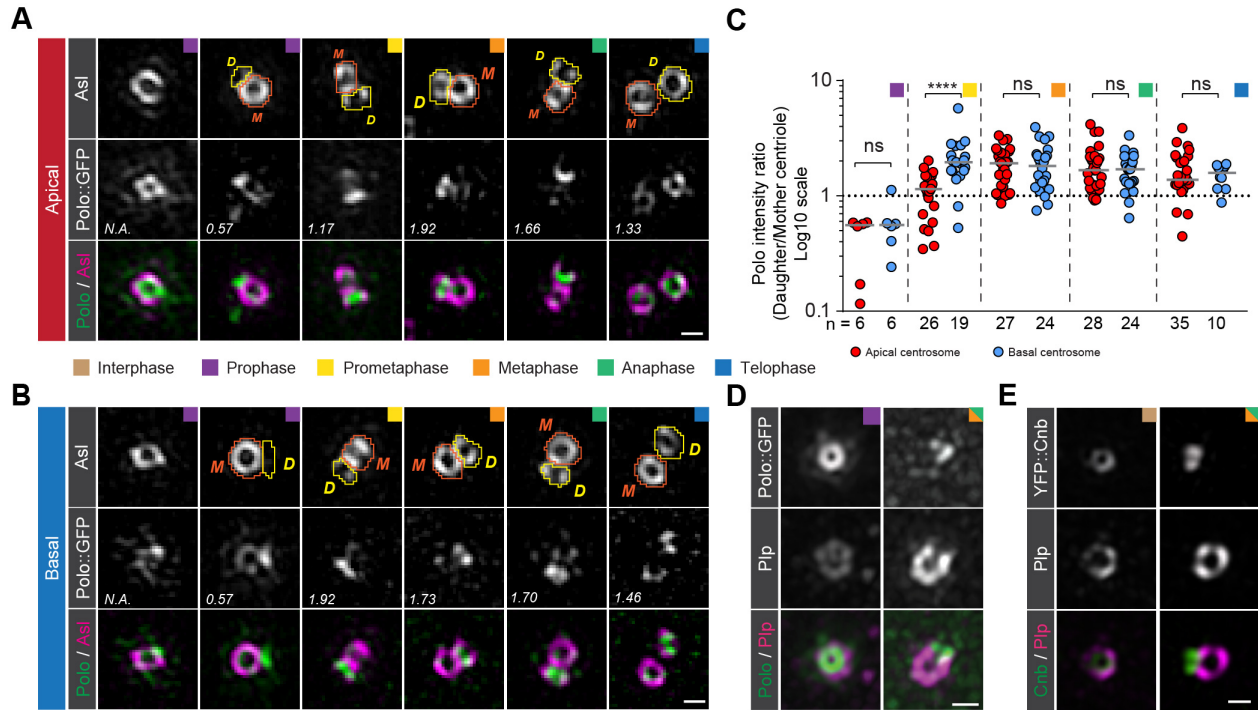

382

383

### 384 **Figure 3: Polo and Cnb separate from Plp in mitosis**

385 Representative 3D-SIM images of (A) apical or (B) basal third instar larval neuroblast centrioles, expressing

386 Polo::GFP (middle row; green in merge). Centriole contours were drawn based on Asl signal (orange and

387 yellow lines for mother and daughter centriole respectively) and used to measure Polo (and Asl; not shown)

388 intensities. The numbers represent total Polo intensity ratios (Daughter/Mother centriole) in the shown

389 image. Polo asymmetry ratios for the apical (red dots) and the basal (blue dots) centrosome are plotted in

390 (C) from three independent experiments. Medians are shown with a grey horizontal line. Prophase: apical

391 versus basal;  $p=0.6991$ . Prometaphase: apical versus basal;  $p=5.688 \times 10^{-6}$ . Metaphase: apical versus basal;

392  $p=0.9329$ . Anaphase: apical versus basal;  $p=0.8628$ . Telophase: apical versus basal:  $p=0.8614$ .

393 Representative interpolated images of apical interphase/early prophase and late metaphase/early anaphase

394 centrosomes, expressing (D) Polo::GFP (green in merge) or (E) YFP::Cnb (green in merge) and stained for

395 Plp (magenta in merge). These experiments were performed three times independently for Polo::GFP and

396 once for YFP::Cnb. Cell cycle stages are indicated with colored boxes. Scale bar is 0.3  $\mu\text{m}$ .

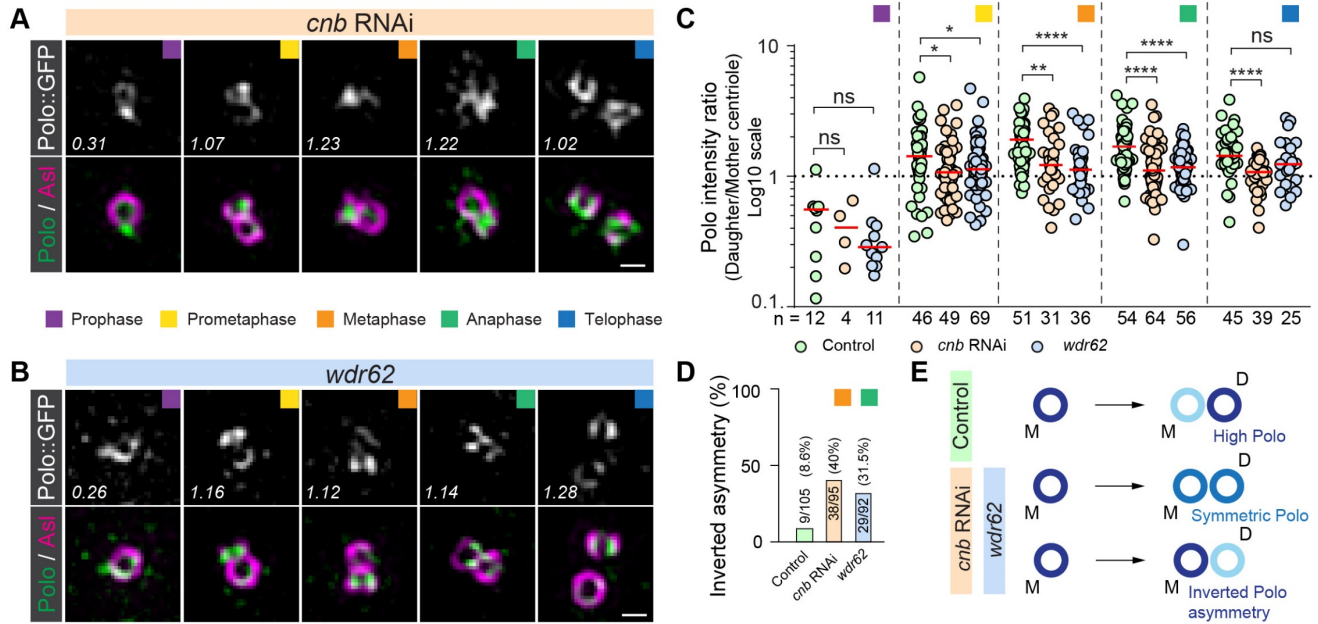

397

398 **Figure 4: Cnb and Wdr62 are required to establish centrosome asymmetry in mitosis.**

399 Representative 3D-SIM images of third instar larval neuroblast centrosomes, expressing (A) RNAi against  
 400 Cnb (*cnb* RNAi) or (B) mutant for *wdr62*. In both conditions, Polo::GFP (green in merge) expressing  
 401 neuroblasts were stained for Asl (magenta in merge). Polo intensity ratios (Daughter/Mother centriole) are  
 402 shown in the representative images and plotted in (C) for control (wild type background; green dots), *cnb*  
 403 RNAi (beige dots) and *wdr62* mutants (blue dots). Since apical and basal centrosomes could not be  
 404 distinguished in *cnb* RNAi and *wdr62* mutants, measurements from these conditions were compared to the  
 405 pooled (apical and basal) control Polo measurements (replotted from Figure 3C). These experiments were  
 406 performed three times independently for wild type control and *cnb* RNAi, and six times for *wdr62*.  
 407 Prophase: wild type control versus *cnb* RNAi;  $p=0.6835$ . wild type control versus *wdr62*;  $p=0.1179$ .  
 408 Prometaphase: wild type control versus *cnb* RNAi;  $p=0.0318$ . wild type control versus *wdr62*;  $p=0.0439$ .  
 409 Metaphase: wild type control versus *cnb* RNAi;  $p=0.0040$ ; wild type control versus *wdr62*;  $p=8.496 \times 10^{-5}$ .  
 410 Anaphase: wild type control versus *cnb* RNAi;  $p=4.19 \times 10^{-6}$ . wild type control versus *wdr62*;  $p=1.79 \times 10^{-6}$ .  
 411 Telophase: wild type control versus *cnb* RNAi;  $p=1.17 \times 10^{-6}$ . wild type control versus *wdr62*;  $p=0.0524$ .  
 412 The percentage of metaphase and anaphase centrosomes with inverted Polo asymmetry are plotted in (D).

413 (E) Summary of phenotypes; in neuroblasts lacking Cnb or Wdr62, Polo often fails to transfer from the  
414 mother (M) to the daughter (D) centriole, resulting in symmetric or inverted asymmetric Polo localization.  
415 Cell cycle stages are indicated with colored boxes. Scale bar is 0.3  $\mu\text{m}$ .  
416

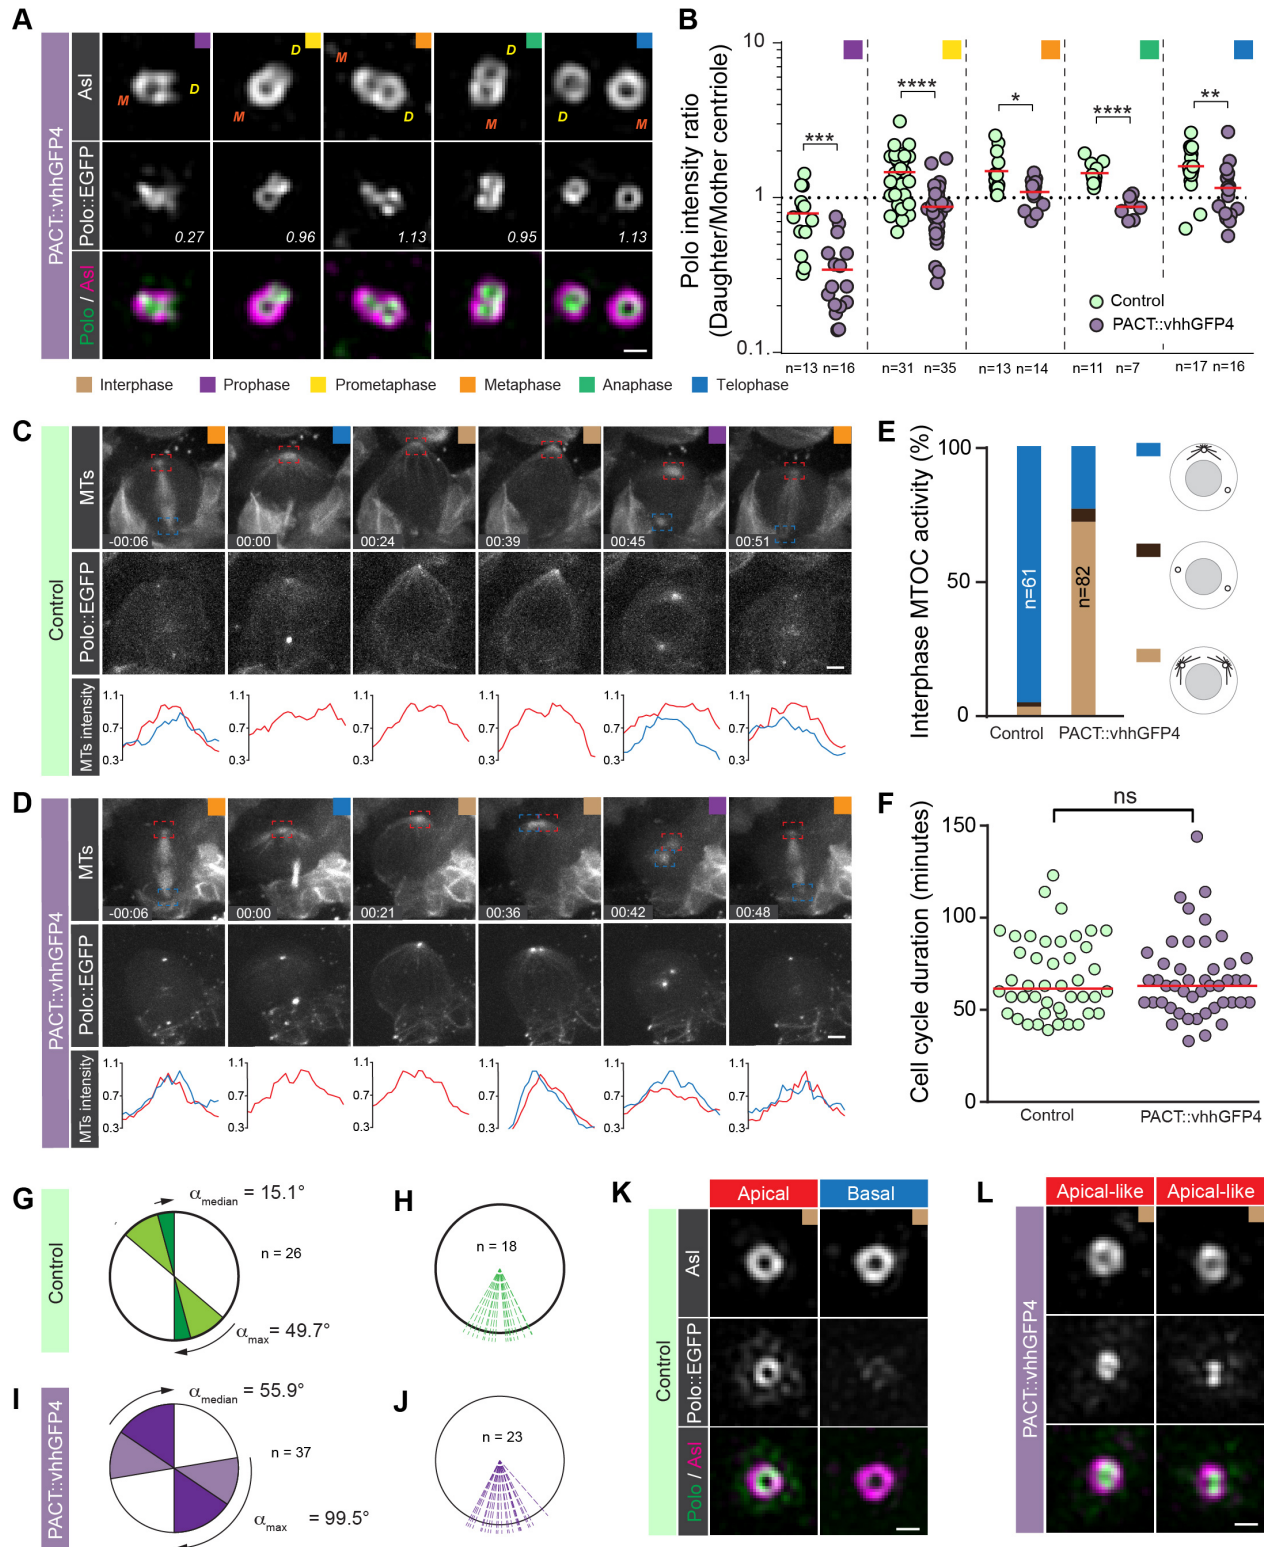

417

418

419

420 **Figure 5: The centrosome asymmetry switch is required for biased interphase MTOC activity and**  
421 **centrosome positioning.**

422 **(A)** Representative 3D-SIM images of third instar larval neuroblast centrosomes, expressing Polo::EGFP  
423 (generated by CRISPR/Cas9) and the nanobody construct PACT::vhhGFP4. Polo::EGFP (green in the  
424 merge) expressing neuroblasts were stained for Asl (magenta in the merge). Polo intensity ratios  
425 (Daughter/Mother centriole) are plotted in **(B)** for Control (green dots) and PACT::vhhGFP4 (purple dots).  
426 These experiments were performed 2 times independently in parallel for both genotypes. Prophase: Control  
427 versus PACT::vhhGFP4;  $p=3.11 \times 10^{-4}$ . Prometaphase: Control versus PACT::vhhGFP4;  $p=3.49 \times 10^{-6}$ .  
428 Metaphase: Control versus PACT::vhhGFP4;  $p=0.0222$ . Anaphase: Control versus PACT::vhhGFP4;  
429  $p=6.28 \times 10^{-5}$ . Telophase: Control versus PACT::vhhGFP4;  $p=0.0077$ . **(C)** Representative live cell imaging  
430 time series of a dividing control (Polo::EGFP, worGal4, UAS-mCherry::Jupiter expressing wild type flies)  
431 and PACT::vhhGFP4 (together with worGal4, UAS-mCherry::Jupiter) **(D)** neuroblast. The microtubule  
432 marker (MTs, first row) and Polo::EGFP (second row) are shown for two consecutive mitoses. Microtubule  
433 intensity of the apical (red line and square) and basal (blue line and square) MTOC are plotted below.  
434 “00:00” corresponds to the telophase of the first division. **(E)**. Bar graph showing the quantification of the  
435 MTOC phenotype. Cell cycle length is shown in **(F)**. The cell cycle length in PACT::vhhGFP4 (purple  
436 dots) is not significantly different from the control (green dots);  $p=9727$ . **(G)** and **(I)** represent the spindle  
437 rotation between NEBD and anaphase. Medians are displayed in dark colors (green; control. Purple;  
438 vhhGFP4 expressing neuroblasts) and the maximum rotation in light colors. Division orientation between  
439 consecutive mitoses shown for control **(H)** and PACT::vhhGFP4 **(J)**. **(K)** and **(L)** are representative 3D-  
440 SIM images of interphase centrosomes for control and PACT::vhhGFP4 expressing neuroblasts,  
441 respectively. The trapping of Polo::EGFP with PACT::vhhGFP4 induces two identical apical-like  
442 centrosomes with a strong centriolar and PCM signal. The data presented for the live imaging here were  
443 obtained from five independent experiments. Cell cycle stages are indicated with colored boxes.  
444 Yellow “D” and orange “M” refer to Daughter and Mother centrioles based on Asl intensity. Timestamps  
445 are shown in hh:mm and scale bar is  $0.3 \mu\text{m}$  (A, K, L) and  $3 \mu\text{m}$  (C,D), respectively.

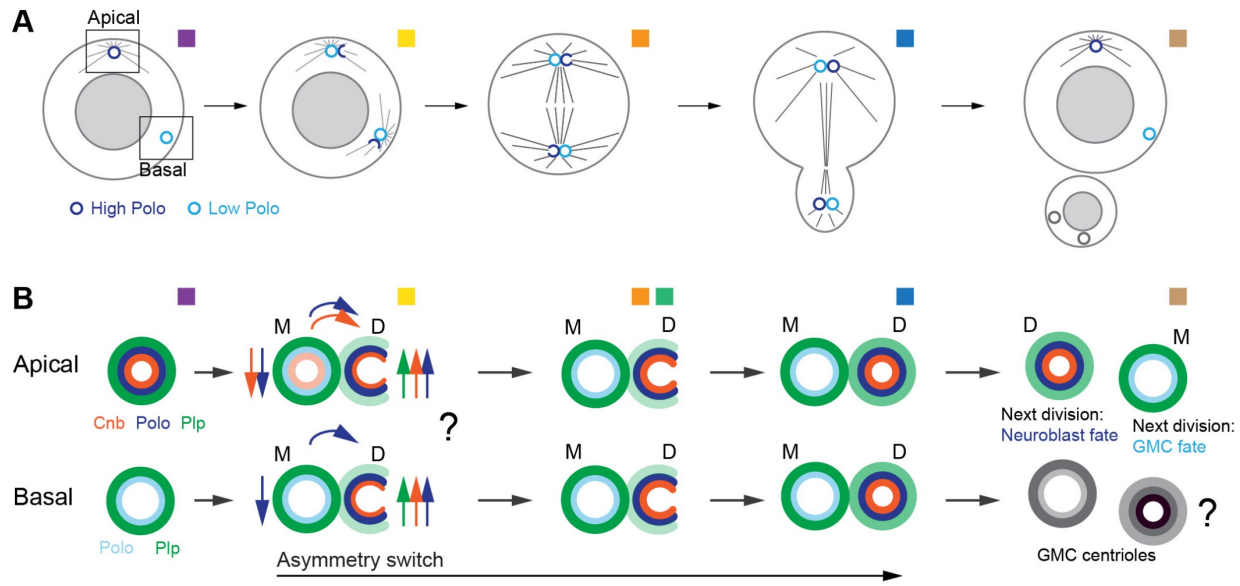

446

447

448 **Figure 6: Model**

449 **(A)** The centrosome asymmetry switch – here shown for Polo (dark and light blue, respectively) – occurs  
 450 during mitosis, coupled to centriolar wall completion. Polo is relocalizing from the existing mother to the  
 451 newly formed daughter centriole on both the apical and basal centrosome. This asymmetry switch causes  
 452 the Polo-rich centriole to maintain MTOC activity, retaining it in the self-renewed neuroblast. Details for  
 453 the apical and basal centrosome are shown in **(B)**. Cnb (orange) and Polo (blue) relocalize from the mother  
 454 to the forming daughter centriole from prophase onwards. The basal centrosome only switches Polo but  
 455 directly upregulates Cnb on the daughter centriole; protein upregulation (vertical arrows) could act in  
 456 parallel to direct protein transfer (curved arrows). Plp remains on the mother, potentially increasing in  
 457 intensity and appearing on the daughter centriole in prometaphase. The centrosome asymmetry switch is  
 458 mostly completed by anaphase. The centriole containing less Plp, gained Cnb and Polo and is destined to  
 459 be inherited by the self-renewed neuroblast in the next division, whereas the centriole containing higher Plp  
 460 and lower Polo levels is destined to be inherited by the GMC. The fate of the basal centrioles and subsequent  
 461 marker distribution is unknown (represented by grey circles).

462

463 **Materials and Methods**

464

465 **Fly strains and genetics:**

466 The following mutant alleles and transgenes were used: CnbRNAi (VDRC, 28651GD), *wdr62*<sup>A3-9</sup> allele<sup>13</sup>,  
467 *Df(2L)Exel8005* (a deficiency removing the entire *wdr62* locus and adjacent genes; Bloomington  
468 Drosophila Stock Center), *worniu-Gal4*<sup>29</sup>, *pUbq-DSas-6::GFP*<sup>30</sup>, *pUbq-GFP::Ana-2*<sup>31</sup>, Cnn::GFP<sup>32</sup>,  
469 *Polo::GFP*<sup>CC01326</sup> (protein trap line<sup>21</sup>), *GFP::Polo* (genomic rescue construct using Polo's endogenous  
470 enhancer)<sup>28</sup>, *Polo::EGFP* (generated by CRISPR; this work), *pUbq-Asl::GFP* and *pUbq-Ana-1::GFP*<sup>33</sup>,  
471 *Plp::EGFP* (this work), *pUbq-YFP::Cnb*<sup>6</sup>, *Bld10::GFP*<sup>33</sup>, *nos-Cas9/Cyo* (Bloomington Drosophila Stock  
472 Center), *y<sup>1</sup> w<sup>67c23</sup> P{y[+mDint2]=Crey}1b; D/TM3, Sb<sup>1</sup>* (Bloomington Drosophila Stock Center), worGal4,  
473 UAS-mCherry::Jupiter<sup>34</sup>.

474

475 **Generation of transgenes using CRISPR/Cas9:**

476 *Plp::EGFP* was generated with CRISPR/Cas9 technology. Two target-specific sequences with high  
477 efficiency were chosen using the CRISPR Optimal Target Finder  
478 (<http://tools.flycrispr.molbio.wisc.edu/targetFinder/>), and the DRSC CRISPR finder and Efficiency  
479 Predictor (<http://www.flyrnai.org/crispr/>), (<http://www.flyrnai.org/evaluateCrispr/>) web tools. Sense and  
480 antisense primers (first target site: CTTCGAACTAGCGTCCACAAGGTC and  
481 AAACGACCTTGTGGACGCTAGTTC; second target site: AAACGACCTTGTGGACGCTAGTTC and  
482 AAACGACCTTGTGGACGCTAGTTC) were cloned into pU6-BbsI-ChiRNA<sup>35</sup> between BbsI sites. To  
483 generate the replacement donor template, 1kb homology arms flanking the target sequences and two "repair  
484 sequences" (to reintroduce the sequence flanking the STOP codon, in between the target sequences) were  
485 cloned into pHD-EGFP-DsRed. This vector was generated by inserting EGFP sequence flanked by attP  
486 sites and fused to a LoxP site, between NdeI and BsiWI sites in pHD-DsRed-attP vector (gift from Melissa  
487 Harrison & Kate O'Connor-Giles & Jill Wildonger (Addgene plasmid # 51019)).

488 Polo::EGFP was generated with a similar strategy. The following sense and antisense primers were used:  
489 first target site CTTCGTCAGTCACCTCGGTGAATAT and AAACATATTCACCGAGGTGACTGAC.  
490 Second target site CTTCGAGACTGTAGGTGACGCATTC and  
491 AAACGAATGCGTCACCTACAGTCTC. Embryos expressing *nos-Cas9*<sup>36</sup> were injected with two pU6-  
492 ChiRNA vectors and the pHD-EGFP-DsRed and successful events were detected by screening for DsRed-  
493 positive eyes in F1 generation. Constitutively active Cre (Bloomington Drosophila Stock Center) was  
494 crossed in to remove the DsRed marker. Positive events were genotyped and sequenced.

495

#### 496 **Generation of PACT::HA::vhhGFP4**

497 The coding sequence of PACT<sup>25</sup> and vhhGFP4<sup>26</sup> were PCR amplified and cloned into a pUAST-attB  
498 vector using In-Fusion technology (Takara, Clontech). HA was added by using primers containing the HA  
499 sequence. The resulting construct was injected into attP (VK00027 and VK00037; Bestgene).

500

#### 501 **Immunohistochemistry:**

502 The following antibodies were used for this study: rat anti- $\alpha$ -Tub (Serotec; 1:1000), mouse anti- $\alpha$ -Tub  
503 (DM1A, Sigma; 1:2500), rabbit anti-Asl (1:500), rabbit anti-Plp (1:1000) (gifts from J. Raff). Secondary  
504 antibodies were from Molecular Probes and the Jackson Immuno laboratory.

505

#### 506 **Antibody staining:**

507 96-120h (AEL; after egg laying) larval brains were dissected in Schneider's medium (Sigma) and fixed for  
508 20 min in 4% paraformaldehyde in PEM (100mM PIPES pH 6.9, 1mM EGTA and 1mM MgSO<sub>4</sub>). After  
509 fixing, the brains were washed with PBSBT (1X PBS, 0.1% Triton-X- 100 and 1% BSA) and then blocked  
510 with 1X PBSBT for 1h. Primary antibody dilution was prepared in 1X PBSBT and brains were incubated  
511 for up to 2 days at 4 °C. Brains were washed with 1X PBSBT four times for 20 minutes each and then



512 incubated with secondary antibodies diluted in 1X PBSBT at 4 °C, overnight. The next day, brains were  
513 washed with 1X PBST (1x PBS, 0.1% Triton-X- 100) four times for 20 minutes each and kept in  
514 Vectashield H-1000 (Vector laboratories) mounting media at 4 °C.

515

### 516 **Super-Resolution 3D Structured Illumination Microscopy (3D-SIM):**

517 3D-SIM was performed on fixed brain samples using a DeltaVision OMX-Blaze system (version 4; GE  
518 Healthcare), equipped with 405, 445, 488, 514, 568 and 642 nm solid-state lasers. Images were acquired  
519 using a Plan Apo N 60x, 1.42 NA oil immersion objective lens (Olympus) and 4 liquid-cooled sCMOs  
520 cameras (pco Edge, full frame 2560 x 2160; Photometrics). Exciting light was directed through a movable  
521 optical grating to generate a fine-striped interference pattern on the sample plane. The pattern was shifted  
522 laterally through five phases and three angular rotations of 60° for each z section. Optical z-sections were  
523 separated by 0.125 µm. The laser lines 405, 488, 568 and 642 nm were used for 3D-SIM acquisition.  
524 Exposure times were typically between 3 and 100 ms, and the power of each laser was adjusted to achieve  
525 optimal intensities of between 5,000 and 8,000 counts in a raw image of 15-bit dynamic range at the lowest  
526 laser power possible to minimize photobleaching. Multichannel imaging was achieved through sequential  
527 acquisition of wavelengths by separate cameras.

528

### 529 **3D-SIM Image Reconstruction:**

530 Raw 3D-SIM images were processed and reconstructed using the DeltaVision OMX SoftWoRx software  
531 package (GE Healthcare; Gustafsson, M. G. L. 2000). The resulting size of the reconstructed images was  
532 of 512 x 512 pixels from an initial set of 256 x 256 raw images. The channels were aligned in the image  
533 plane and around the optical axis using predetermined shifts as measured using a target lens and the  
534 SoftWoRx alignment tool. The channels were then carefully aligned using alignment parameter from  
535 control measurements with 0.5 µm diameter multi-spectral fluorescent beads (Invitrogen, Thermo Fisher  
536 Scientific).

537

538 **Diameter measurements method:**

539 Maximum projection of centrioles were aligned in  $x,y$  and segmented using a custom-made MatLab code.  
540 Centroids for both inner and outer centriole rings were determined and the mean inner and outer radii were  
541 calculated by averaging the distance from the centroid to all the edge pixels, respectively. Dot like-  
542 structures were measured with a similar method. If dots appeared fused, the centroid for each dot was first  
543 determined by removing the overlapping region using a high threshold value. A lower background threshold  
544 value was used to distinguish the centriole's outer boundary from surrounding background. The radial  
545 distance from each centroid to all the edge pixels of the centriole's outer boundary was then calculated. To  
546 accurately measure the mean radius of a centriole that has an overlapping region with another centriole,  
547 only the radial distance, revolving around the hemisphere of the selected centriole, was used for the  
548 calculation. The areas were measured using only pixels with an intensity value above the chosen  
549 background threshold.

550

551 **Centriole age measurement method:**

552 To determine centriolar age, Asl intensity was used as a reference. The contours of non-overlapping  
553 centrioles were drawn in ImageJ based on Asl signal and saved as XY coordinates. Using a custom-made  
554 MatLab code, the total intensities above the background threshold values (determined by the experimenter)  
555 for Asl were calculated in the drawn centriolar areas. Total Asl intensity was then used to determine  
556 centriolar age: daughter centrioles have lower intensity than mother centrioles. The same XY coordinates  
557 were used to measure total pixel intensity for markers of interest (e.g Polo::GFP, Plp::EGFP). Asymmetry  
558 ratios for markers of interest were then determined by dividing the total daughter centriole pixel intensity  
559 with total pixel intensity from the mother centriole, respectively.

560

561 **Live cell imaging**

562 96-120h (AEL; after egg laying) larval brains were dissected in Schneider's medium (Sigma-Aldrich,  
563 S0146) supplemented with 10% BGS (HyClone) and transferred to 50  $\mu$ L wells (Ibidi,  $\mu$ -Slide

564 Angiogenesis) for live cell imaging. Live samples were imaged on a Perkin Elmer spinning disk confocal  
565 system “Ultra View VoX” with a Yokogawa spinning disk unit and two Hamamatsu C9100-50 frame  
566 transfer EMCCD cameras. A 63x / 1.40 oil immersion objective mounted on a Leica DMI 6000B was used.  
567 Brains from a given genotype and the corresponding control were imaged under temperature control (25°C)  
568 in parallel. The time resolution was 3 minutes.

569

#### 570 **Angle measurements**

571 Imaris’ “Spot” tool was used to collect x, y and z coordinates of apical and basal centrosomes before NEBD  
572 and at anaphase. These coordinates were used to calculate spindle rotation between NEBD and anaphase  
573 onset and changes in division axis between successive anaphases.

574

#### 575 **Statistical analysis:**

576 Statistical analyses were performed on Prism (GraphPad software). Statistical significance was assessed  
577 with a two-sided non-parametric Mann-Whitney test to compare ranks between two samples with variable  
578 variances and non-Gaussian distributions. P values < 0.05 were considered significant;

579 \*; p < 0.05 \*\*; p < 0.01; \*\*\*; p < 0.001; \*\*\*\*; p < 0.0001.

580

#### 581 **Computer codes:**

582 Custom made Matlab codes used for data analysis are available upon request.

583

#### 584 **Data availability:**

585 The authors declare that the data supporting the findings of this study are available within the paper and its  
586 supplementary information files.

587

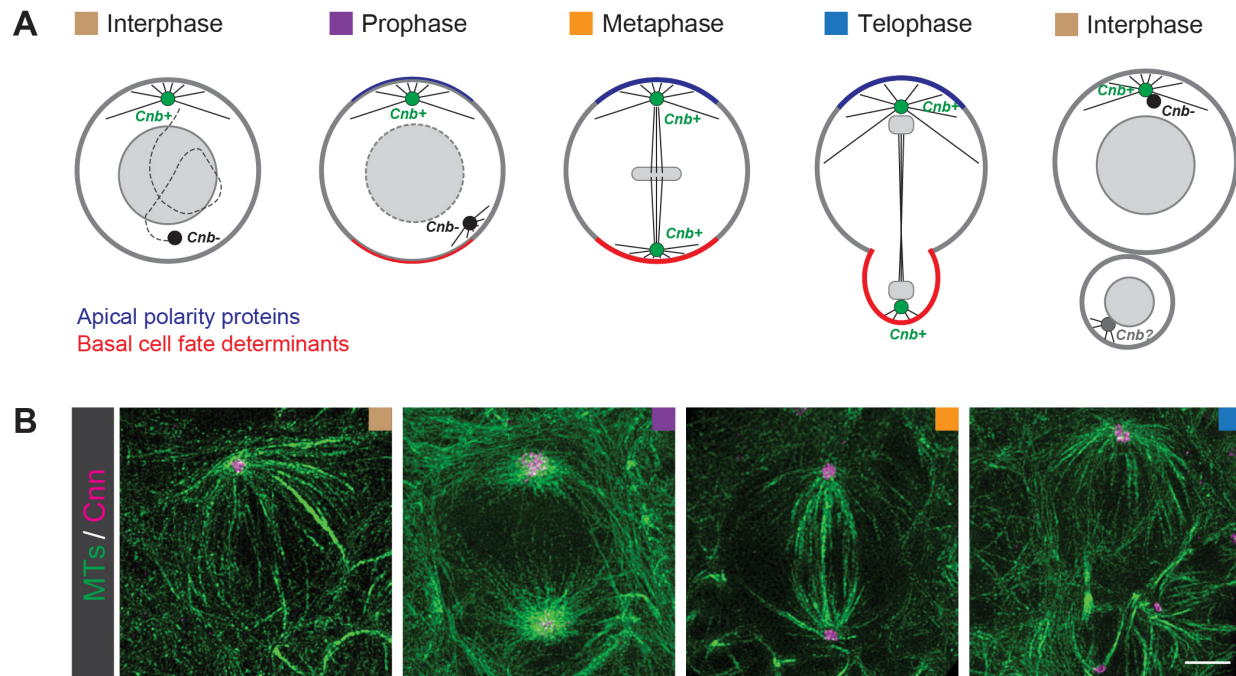

588

589

590

591 **Figure S1: Neuroblast centrosomes are intrinsically asymmetric**

592 **(A)** Current model of centrosome asymmetry in neuroblast. The  $Cnb^+$  apical daughter centrosome is active  
593 throughout interphase and constantly nucleates a robust microtubule array, maintaining its position at the  
594 apical neuroblast cortex (blue crescent). The  $Cnb^-$  basal mother centrosome is inactive during interphase,  
595 diffusing through the cytoplasm until it regains MTOC activity in prophase. At this point, the  $Cnb^-$   
596 centrosome reached the basal side of the neuroblast and starts to reaccumulate  $Cnb$  during mitosis. The  
597 daughter centrosome is retained by the neuroblast and the mother centrosome is inherited by the  
598 differentiating GMC. Asymmetric centrosomes split in early interphase. **(B)** Representative 3D-SIM  
599 images of neuroblasts expressing the pericentriolar marker  $Cnn::GFP$  stained for  $\alpha$ -Tubulin, labelling  
600 microtubules (MTs; green). The morphology of the microtubule array and cell shape were used to define  
601 neuroblast cell cycle stages. Scale bar is 3  $\mu m$ . Colored boxes indicate cell cycle stages.

602

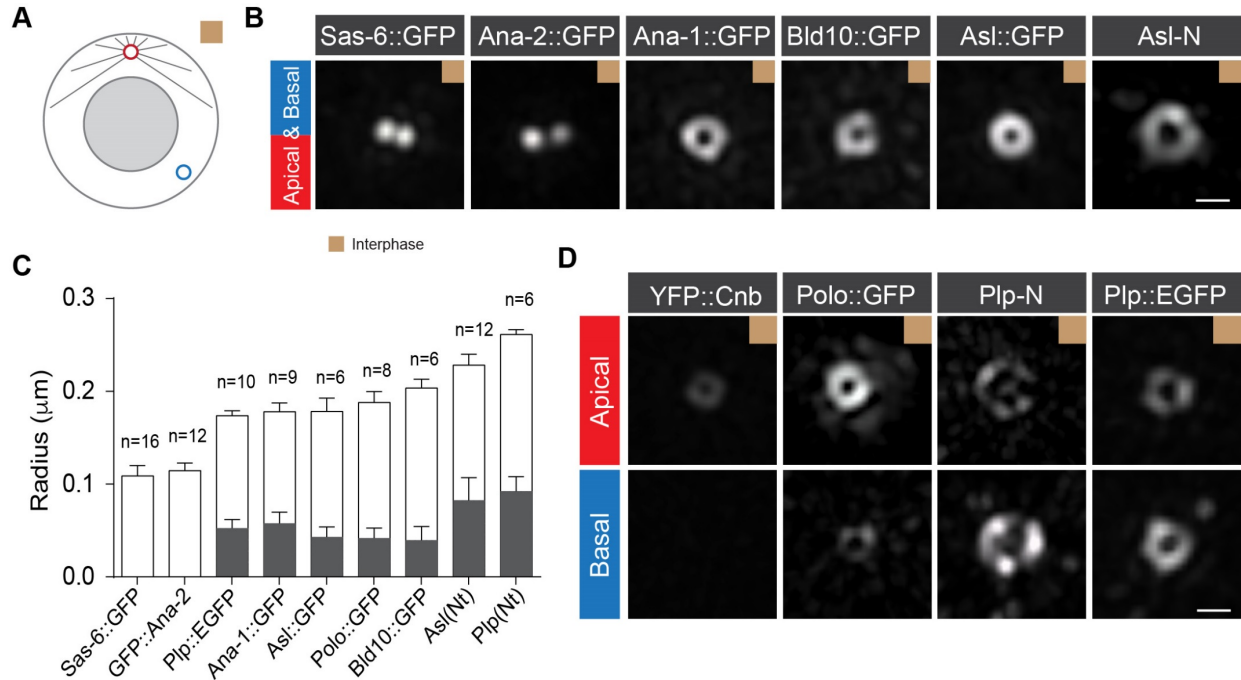

603

604

605

606 **Figure S2: Centriolar proteins define centriole morphology and asymmetry**

607 **(A)** Localization of centriolar markers was determined on apical (red circle) and basal (blue circle)

608 centrosomes. **(B)** Representative, interpolated 3D-SIM images of interphase neuroblasts, expressing GFP-

609 tagged centriolar markers or stained for Asl (recognizing Asl's N-terminus). **(C)** Radii measurements of

610 centrosomal proteins. Outer (white) and inner (gray) radii are shown for proteins forming a ring-like

611 structure. **(D)** Apical (red circle in (A)) and basal (blue circle in (A)) centrosomes, expressing or stained for

612 centriolar markers, displaying asymmetric localization in interphase. Interpolated images are shown. Scale

613 bar is 0.3 μm. Data was extracted from one to four independent experiments.

614

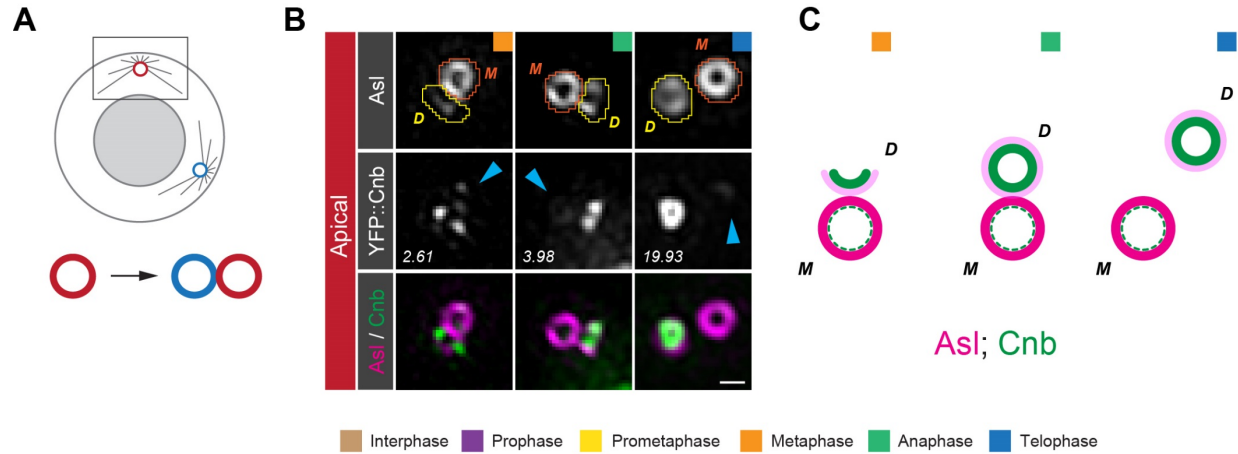

615

616

617 **Figure S3: Cnb switches from the mother to the daughter centriole in early mitosis**

618 (A) Cnb localization was analyzed on apical centrosomes (red circle). (B) In a few metaphase to telophase  
619 neuroblasts, weak Cnb was also detectable on the mother centriole (light blue arrowheads). This class of  
620 centrosomes is represented with the light blue bar in Figure 2G. (C) Cartoon, summarizing the findings  
621 shown in (B). Scale bar is 0.3  $\mu$ m. Colored boxes indicate cell cycle stages.

622

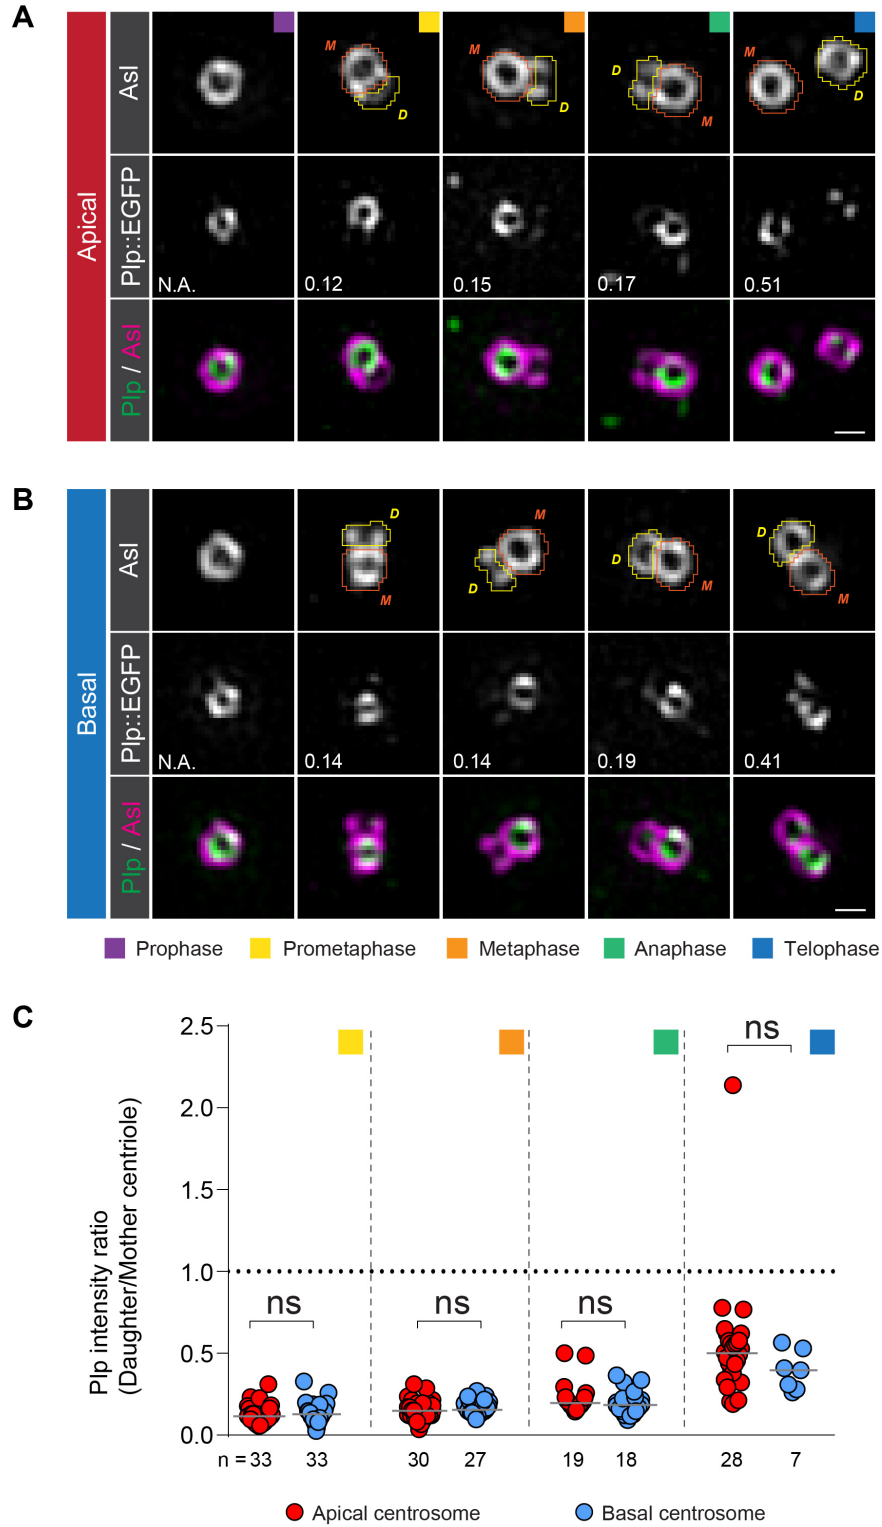

623

624

625

626 **Figure S4: Plp does not transfer but remains localized on the mother centriole**

627 Representative 3D-SIM images of **(A)** apical and **(B)** basal third instar larval neuroblast centrosomes,  
628 expressing Plp::EGFP (middle row; green in merge), co-stained with Asl (white on top, magenta in merge).

629 The number represents total Plp intensity ratios (Daughter/Mother centriole) in the shown image. Plp

630 asymmetry ratios for the apical (red dots) and the basal (blue dots) centrosome are plotted in **(C)** from three

631 independent experiments. Medians are shown in dark grey. Prometaphase: apical versus basal;  $p=0.3856$ .

632 Metaphase: apical versus basal;  $p=0.2234$ . Anaphase: apical versus basal;  $p=0.3583$ . Telophase: apical

633 versus basal;  $p=0.1844$ . Plp does not switch its localization but remains localized on the mother centriole

634 on both centrosomes. Scale bar is  $0.3\ \mu\text{m}$  Colored boxes indicate cell cycle stages.

635



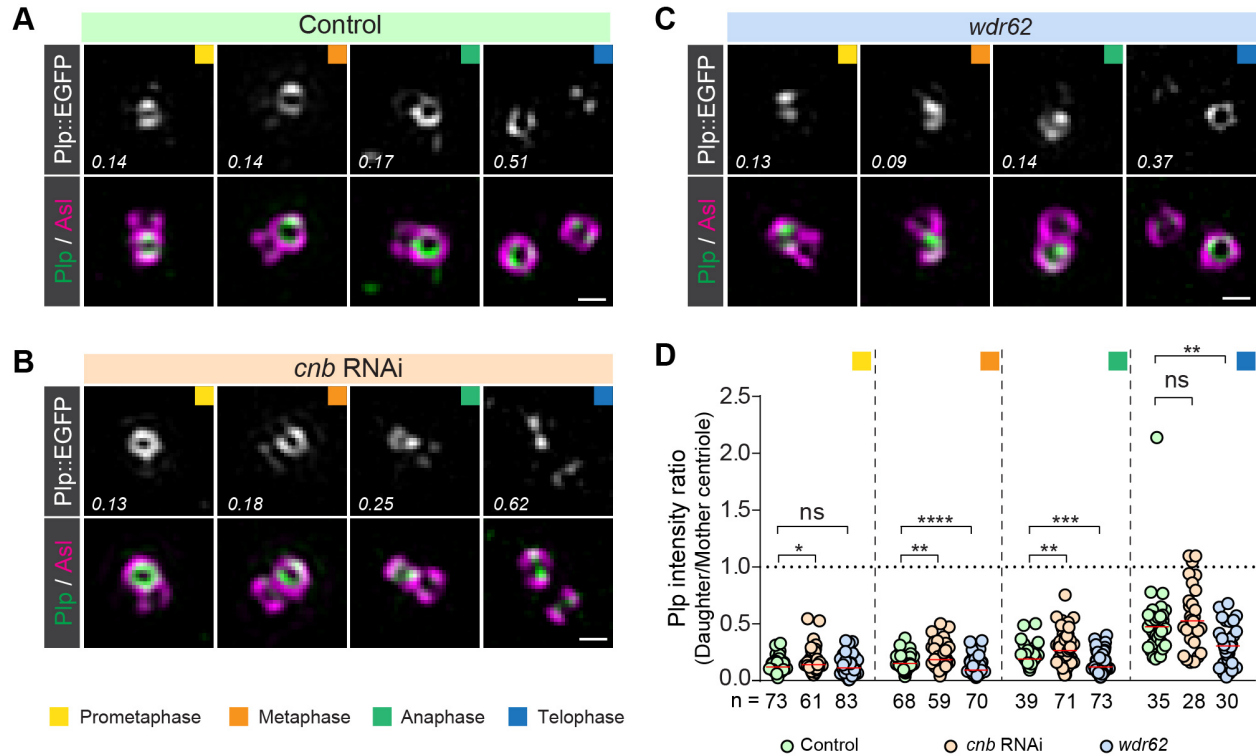

636

637 **Figure S5: Cnb and Wdr62 are partially required to maintain and transfer Plp on the mother**  
 638 **centriole**

639 Representative 3D-SIM images of (A) wild type control, (B) *cnb* RNAi expressing or (C) *wdr62* mutant  
 640 neuroblasts centrosomes, expressing endogenously tagged Plp (Plp::EGFP; green in the merge) stained for  
 641 Asl (magenta in the merge). The number represents total Plp intensity ratios (Daughter/Mother centriole)  
 642 in the shown image. Plp ratios (Daughter/Mother centriole) were plotted in (D). Since apical and basal  
 643 centrosomes could not be distinguished in *cnb* RNAi and *wdr62* mutants, measurements from these  
 644 conditions were compared to the pooled (apical and basal) control Plp measurements (replotted from Figure  
 645 S4C). Prometaphase: control versus *cnb* RNAi;  $p=0.0159$ . control versus *wdr62*;  $p=0.1175$ . Metaphase:  
 646 control versus *cnb* RNAi;  $p=0.0025$ . control versus *wdr62*;  $p=8.95 \times 10^{-7}$ . Anaphase: control versus *cnb*  
 647 RNAi;  $p=0.0057$ . control versus *wdr62*;  $p=1.61 \times 10^{-4}$ . Telophase: control versus *cnb* RNAi;  $p=0.2736$ .  
 648 control versus *wdr62*;  $p=0.0019$ . Medians are shown in red. *cnb* RNAi mitotic centrosomes showed a weak  
 649 but significant increase of their Plp intensity ratios from prometaphase until anaphase while *wdr62* mutant  
 650 mitotic centrosomes displayed weak but significant decrease of their Plp ratio from metaphase onwards.

651 Scale bar is 0.3  $\mu\text{m}$ . Colored boxes indicate cell cycle stages. These experiments were performed three  
652 times independently for each genotype.

653

654

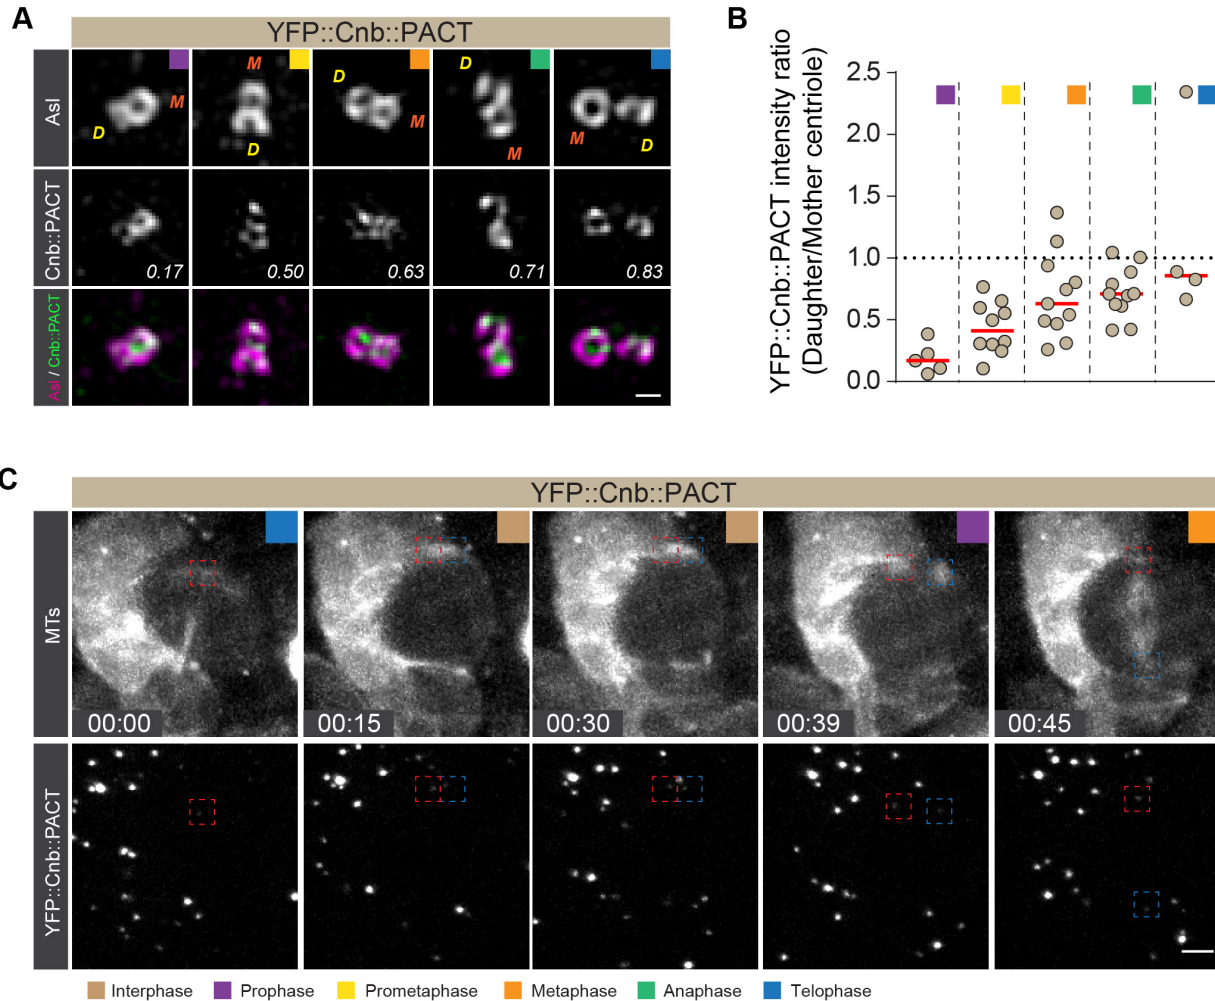

655

656

657 **Figure S6: The ectopic localization of Cnb to both centrioles impairs Cnb to switch completely from**  
 658 **the mother to the daughter centriole, affecting interphase MTOC activity**

659 **(A)** Representative 3D-SIM images of third instar larval neuroblast centrosomes, expressing  
 660 YFP::Cnb::PACT (white in the second row, green in the merge) and stained for Asl (white in the first row,  
 661 magenta in the merge). The number represents total YFP::Cnb::PACT intensity ratios (Daughter/Mother  
 662 centriole) in the shown image. YFP::Cnb::PACT Polo intensity ratios (Daughter/Mother centriole) from  
 663 two experiments are plotted in **(B)**. **(C)** Representative live cell imaging series from a neuroblast, recorded  
 664 in the intact brain, expressing the microtubule marker mCherry::Jupiter (MTs, first row) and  
 665 YFP::Cnb::PACT (second row). Red and blue squares represent apical and basal centrosome respectively.

666 “00:00” corresponds to the telophase of the first division. Cell cycle stages are indicated with colored boxes.

667 Yellow “D” and orange “M” refer to Daughter and Mother centrioles based on Asl intensity. Timestamps

668 are shown in hh:mm and scale bar is 0.3 $\mu$ m (A) and 3  $\mu$ m (C), respectively.

669

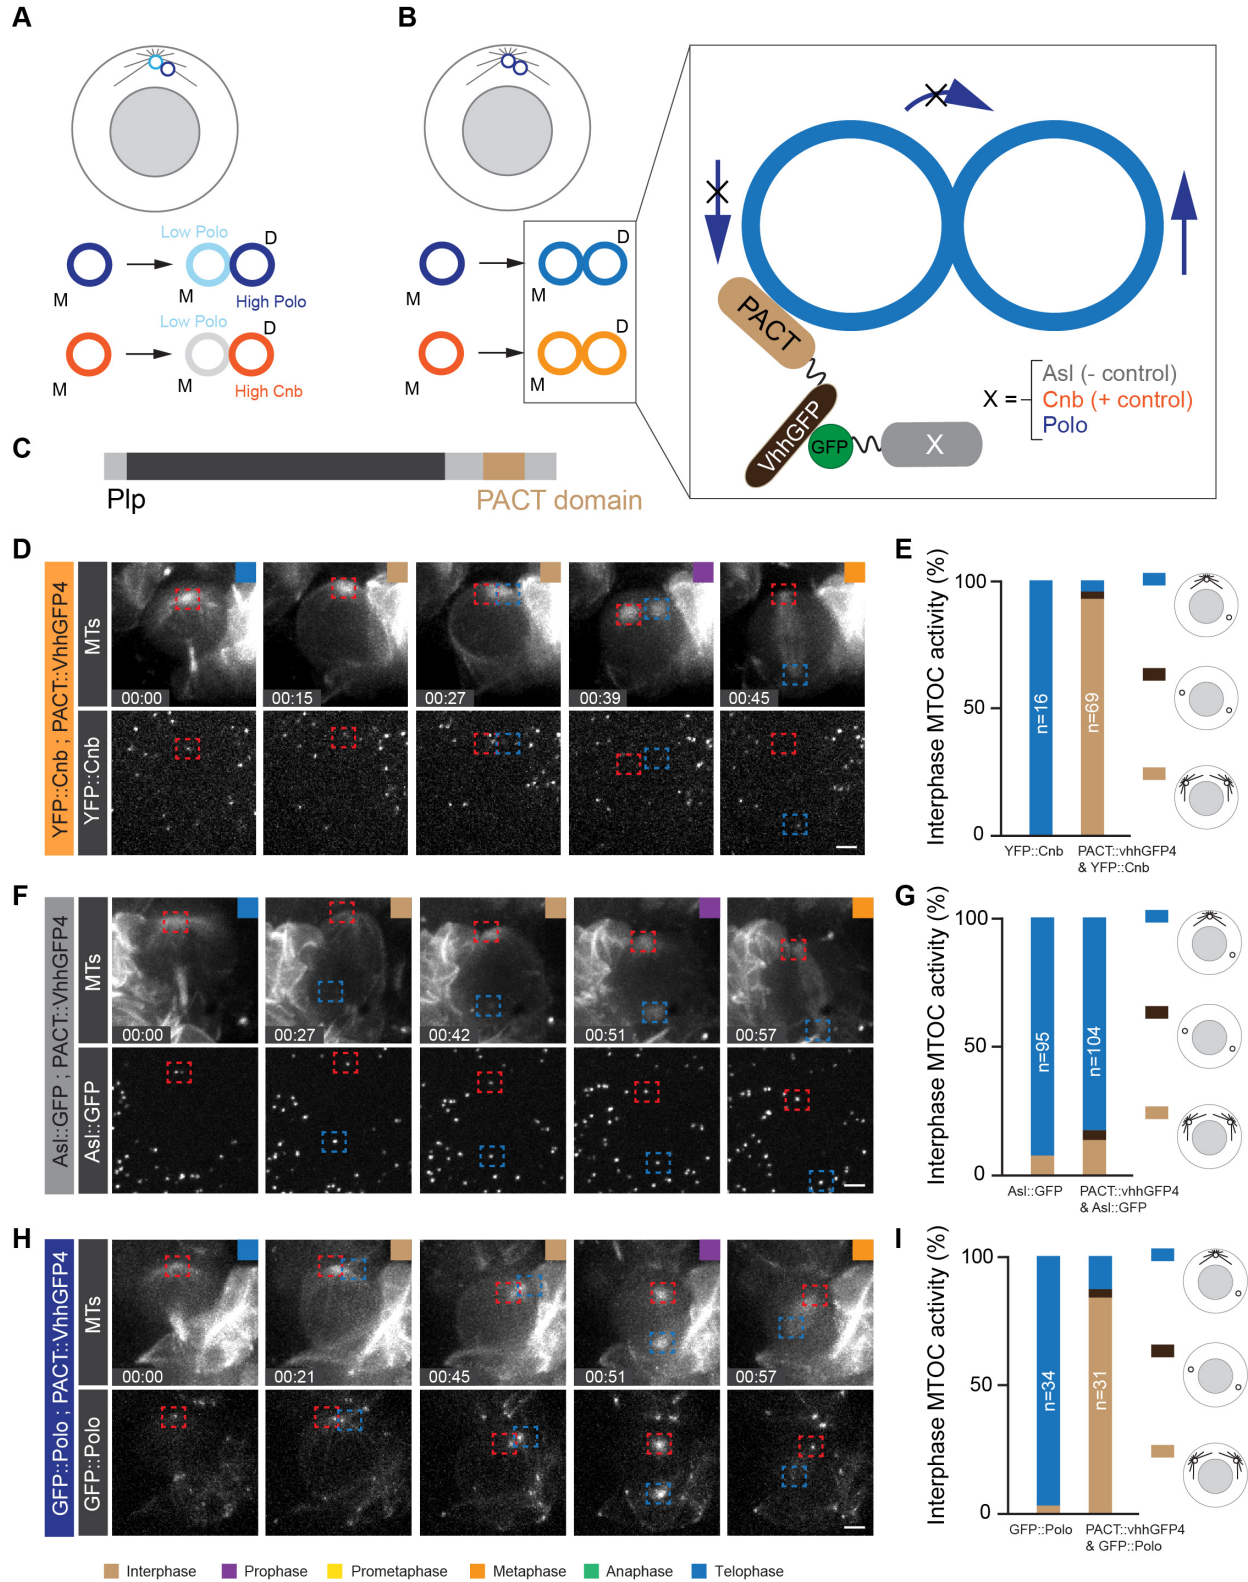

670

671

672 **Figure S7: Perturbing centriolar asymmetry by expressing the GFP-trapping nanobody to the**  
673 **mother centriole**

674 **(A)** To test the function of the centrosome asymmetry switch, the relocalization of Polo and Cnb needs to  
675 be perturbed. **(B)** Nanobody technology was used to prevent the centrosome asymmetry switch for selected  
676 proteins of interest. The vhhGFP4 nanobody specifically traps GFP or YFP tagged proteins. By tethering  
677 the nanobody preferentially to the mother centriole - using Plp's PACT domain **(C)**, we can perturb the  
678 relocalization of GFP or YFP tagged centrosomal proteins. Crossed-out arrows illustrate a lack of centriolar  
679 protein (shown for Polo; blue) relocalization. Representative live cell image series from intact brains for  
680 neuroblasts expressing the microtubule marker mCherry::Jupiter (first row), together with **(D)** YFP::Cnb  
681 and PACT::vhhGFP4, **(F)** Asl::GFP and PACT::vhhGFP4 or **(H)** GFP::Polo transgene (genomic rescue  
682 construct; see methods) and PACT::vhhGFP4. MTOC quantifications are shown for YFP::Cnb **(E)**,  
683 Asl::GFP **(G)** and GFP::Polo **(I)**. "00:00" corresponds to telophase of the previous division. Cell cycle  
684 stages are indicated with colored boxes. The data presented here were obtained from two, four and three  
685 independent experiments for YFP::Cnb, Asl::GFP and GFP::Polo respectively. Timestamps are hh:mm and  
686 scale bar is 3 $\mu$ m.

687

688 **Movie legends**

689

690 **Movie 1: Wild type control movie**

691 Wild type control larval neuroblast expressing the centriolar marker YFP::Cnb (green) and the microtubule  
692 marker UAS-mCherry::Jupiter (white), driven by the neuroblast-specific worGal4 transgene. Note that the  
693 daughter centriole (Cnb<sup>+</sup>) remains active and anchored to the apical cortex throughout interphase. The  
694 second centrosome matures in prophase (00:39) after it reached the basal side of the cell. “00:00”  
695 corresponds to telophase. Time scale is hh:mm and the scale bar is 3µm.

696

697 **Movie 2: Neuroblast expressing YFP::Cnb::PACT; related to figure S6.**

698 Larval neuroblast expressing YFP::Cnb::PACT (green) and the microtubule marker UAS-mCherry::Jupiter  
699 (white), driven by the neuroblast-specific worGal4 transgene. Note that YFP::Cnb::PACT is present on  
700 both centrioles. Both centrosomes remain active and anchored to the apical cortex throughout interphase.  
701 Centrioles split in prophase (00:39) accompanied by a large spindle rotation (00:42 - 00:45), resulting in  
702 normal asymmetric cell division. “00:00” corresponds to telophase. Time scale is hh:mm and the scale bar  
703 is 3µm.

704

705 **Movie 3: Neuroblast expressing YFP::Cnb together with centriole tethered PACT::vhhGFP4;  
706 related to figure S7.**

707 Larval neuroblast expressing the centriolar marker YFP::Cnb (green), the microtubule marker UAS-  
708 mCherry::Jupiter (white) and the PACT::vhhGFP4 nanobody; both UAS lines are driven by the neuroblast-  
709 specific worGal4 transgene. The PACT domain confines the nanobody predominantly to the mother  
710 centriole. Both centrosomes remain active and anchored to the apical cortex throughout interphase.  
711 Centrosome splitting occurs a few minutes before mitosis (00:36). “00:00” corresponds to telophase. Time  
712 scale is hh:mm and the scale bar is 3µm.

713 **Movie 4: Neuroblast expressing Asl::GFP together with centriole tethered PACT::vhhGFP4; related**  
714 **to figure S7.**

715 Larval neuroblast expressing the centriolar marker Asl::GFP (green), the microtubule marker UAS-  
716 mCherry::Jupiter (white) and the PACT::vhhGFP4 nanobody; both UAS lines are driven by the neuroblast-  
717 specific worGal4 transgene. Similar to the wild type control, the daughter centriole remains active and  
718 anchored to the apical cortex throughout interphase. The mother centriole sheds its MTOC activity and  
719 moves away in early interphase (00:15). At mitotic entry (00:45), the mother centriole matures after it  
720 reached the basal side of the cell. “00:00” corresponds to telophase. Time scale is hh:mm and the scale bar  
721 is 3 $\mu$ m.

722

723 **Movie 5: Wild type control neuroblast expressing Polo::EGFP; related to figure 5.**

724 Wild type control larval neuroblast expressing Polo::EGFP (green) engineered by CRISPR/Cas9  
725 technology and the microtubule marker mCherry::Jupiter (white). Note that the daughter centriole remains  
726 active and anchored to the apical cortex throughout interphase. The mother centriole matures at 00:42 after  
727 it reached the basal cell cortex. “00:00” corresponds to telophase. Time scale is hh:mm and the scale bar is  
728 3 $\mu$ m.

729

730 **Movie 6: Neuroblast expressing Polo::EGFP together with centriole tethered PACT::vhhGFP4;**  
731 **related to figure 5.**

732 Larval neuroblast expressing Polo::EGFP (green) engineered by CRISPR/Cas9 technology, the microtubule  
733 marker mCherry::Jupiter (white) and the PACT::vhhGFP4 nanobody; both UAS lines are driven by the  
734 neuroblast-specific worGal4 transgene. Both MTOCs remain active and anchored to the apical cortex  
735 throughout interphase. Centrioles split only 6 minutes before mitosis starts (00:36). The mitotic spindle  
736 rotates significantly (00:42-00:48) to realign the spindle along the internal apical – basal polarity axis and



737 to ensure normal asymmetric cell division. “00:00” corresponds to telophase. Time scale is hh:mm and the  
738 scale bar is 3 $\mu$ m.

739

740 **Movie 7: Neuroblast expressing GFP::Polo together with centriole tethered PACT::vhhGFP4;**  
741 **related to figure S7.**

742 Larval neuroblast expressing the transgene GFP::Polo (green), the microtubule marker mCherry::Jupiter  
743 (white) and the PACT::vhhGFP4 nanobody; both UAS lines are driven by the neuroblast-specific worGal4  
744 transgene. Both MTOCs remain active and anchored to the apical cortex throughout interphase. Centrioles  
745 split only 6 minutes before mitosis starts (00:48). “00:00” corresponds to telophase. Time scale is hh:mm  
746 and the scale bar is 3 $\mu$ m.

747
