1 **Dynamic centriolar relocalization of Polo kinase and Centrobin in early mitosis primes centrosome**  
2 **asymmetry in fly neural stem cells**

3

4 Emmanuel Gallaud<sup>1,6,\*</sup>, Anjana Ramdas Nair<sup>1,3,\*</sup>, Nicole Horsley<sup>2</sup>, Arnaud Monnard<sup>1,2</sup>, Priyanka  
5 Singh<sup>1,4</sup>, Tri Thanh Pham<sup>2</sup>, David Salvador Garcia<sup>1,5</sup>, Alexia Ferrand<sup>1</sup> & Clemens Cabernard<sup>2,#</sup>

6

7

8 <sup>1</sup> Biozentrum, University of Basel  
9 Klingelbergstrasse 50-70  
10 CH-4056 Basel, Switzerland

11

12 <sup>2</sup> Department of Biology, University of Washington  
13 Life Science Building  
14 Seattle, WA 98105, USA

15

16 <sup>3</sup> Present address:

17 NYU Abu Dhabi, Saadiyat Campus  
18 Abu Dhabi, United Arab Emirates

19

20 <sup>4</sup> Present address:

21 Department of Bioscience & Bioengineering, Indian Institute of Technology Jodhpur  
22 NH 65, Nagour Road, Karwar, Jodhpur District  
23 Rajasthan, India 342037.

24

25 <sup>5</sup> Present address:

26 Division of Cell Biology, MRC Laboratory of Molecular Biology  
27 Francis Crick Avenue  
28 Cambridge CB2 0QH, UK.

29

30 <sup>6</sup> Present address:

31 Institute of Genetics and Development of Rennes, UMR6290 CNRS – Université Rennes 1  
32 Campus Santé de Villejean  
33 2 avenue du Pr. Léon Bernard  
34 35043 Rennes Cedex, France.

35

36

37

38 \* These authors contributed equally

39

40 # Lead and corresponding author: [ccabern@uw.edu](mailto:ccabern@uw.edu)

41 **Centrosomes, the main microtubule organizing centers (MTOCs) of metazoan cells, contain an**  
42 **older ‘mother’ and a younger ‘daughter’ centriole. Stem cells either inherit the mother or daughter**  
43 **centriole-containing centrosome, providing a possible mechanism for biased delivery of cell fate**  
44 **determinants. However, the dynamics and mechanisms regulating centrosome asymmetry and**  
45 **biased centrosome segregation are unclear. Using 3D-Structured Illumination Microscopy (3D-**  
46 **SIM) and live cell imaging we show that in fly neural stem cells (neuroblasts) the mitotic kinase**  
47 **Polo and its centriolar protein substrate Centrobin (Cnb) dynamically relocate from the mother**  
48 **to the daughter centriole during mitosis. This mechanism generates a centrosome, containing two**  
49 **molecularly distinct centrioles by telophase. Cnb’s timely relocation is regulated by Polo-**  
50 **mediated phosphorylation whereas Polo’s daughter centriole enrichment requires both Wdr62 and**  
51 **Cnb. Based on optogenetic protein mislocalization experiments we propose that the establishment**  
52 **of centriole asymmetry in mitosis primes biased interphase MTOC activity, necessary for correct**  
53 **spindle orientation.**

## 54 **Introduction**

55 Centrosomes consist of a pair of centrioles, embedded in structured layers of pericentriolar material  
56 (PCM)<sup>1</sup>. During interphase of each cell cycle a single ‘daughter’ centriole is formed around a central  
57 cartwheel at a right angle to the existing older ‘mother’ centriole<sup>2-4</sup>. Based on this replication cycle,  
58 centrioles - and thereby centrosomes – have an intrinsic age asymmetry. Centrosome asymmetry is also  
59 manifested in the unequal clustering of proteins or mRNA<sup>5-7</sup>. Many metazoan cells recognize  
60 centrosomal asymmetry as a cue for biased centrosome segregation, providing a possible mechanism to  
61 determine, or influence, cell fate decisions<sup>8</sup>. For instance, vertebrate neural stem cells and *Drosophila*  
62 male germline stem cells both retain the mother centriole-containing centrosome (mother centrosome  
63 hereafter)<sup>9,10</sup>, while *Drosophila* female germline or neural stem cells, called neuroblasts, inherit the  
64 daughter centriole-containing centrosome (daughter centrosome hereafter)<sup>11-13</sup>.

65 In *Drosophila* male germline or neural stem cells, asymmetric centrosome function mediates  
66 spindle orientation<sup>10,14</sup>. Correct spindle orientation is necessary for stem cell cycle progression, stem cell  
67 homeostasis and differentiation<sup>15,16</sup>. However, the mechanisms establishing functional centrosome  
68 asymmetry are incompletely understood. Furthermore, how centrosome asymmetry affects biased  
69 centrosome segregation remains elusive.

70 Here, we use *Drosophila* neuroblasts to investigate the spatiotemporal mechanisms underlying  
71 the establishment of centrosome asymmetry *in vivo*. Neuroblast centrosomes are highly asymmetric in  
72 interphase: one centrosome forms an active MTOC, while its sibling remains inactive until entry into  
73 mitosis<sup>12,14,17</sup>. The active interphase MTOC contains the daughter centriole, identifiable with the  
74 orthologue of the human daughter centriole-specific protein Cnb (Cnb<sup>+</sup>)<sup>11</sup>. This biased MTOC activity is  
75 regulated by the mitotic kinase Polo (Plk1 in vertebrates). Polo phosphorylates Cnb, necessary to  
76 maintain an active MTOC, tethering the daughter centriole-containing centrosome to the apical interphase  
77 cortex (the apical centrosome hereafter)<sup>18</sup>. Apical centrosome tethering predetermines the alignment of  
78 the mitotic spindle along the intrinsic apical-basal polarity axis. Furthermore, this cortical association  
79 ensures that the daughter centrosome is inherited by the self-renewing neuroblast<sup>11,18</sup>. Polo localization

80 on the apical centrosome is maintained by the microcephaly associated protein Wdr62<sup>19</sup>. The mother  
81 centrosome, separating from the daughter centrosome in interphase, downregulates Polo and MTOC  
82 activity through Pericentrin (PCNT)-like protein (Plp) and Bld10 (Cep135 in vertebrates)<sup>20,21</sup>. The lack of  
83 MTOC activity prevents the mother centrosome from engaging with the apical cell cortex; it randomly  
84 migrates through the cytoplasm until centrosome maturation in prophase establishes a second MTOC near  
85 the basal cortex (called the basal centrosome hereafter), ensuring its segregation into the differentiating  
86 ganglion mother cell (GMC). Later in mitosis, the mother centrosome also accumulates Cnb<sup>12,14,17,20</sup> (and  
87 Supplementary Fig.1a).

88         Although several centrosomal proteins have been described to be enriched on either the mother or  
89 daughter centrosome in *Drosophila* interphase neuroblasts<sup>11,19,22</sup> or human cells<sup>5</sup>, it is unknown when  
90 and how centrosomes acquire their unique molecular identity to determine biased MTOC activity, and  
91 thus correct spindle orientation. Here, we show that centrosome asymmetry is primed in early mitosis by  
92 dynamically relocalizing Polo and Cnb from the older mother to the younger daughter centriole, while  
93 selectively retaining Plp on the mother centriole. We further show that priming centrosome asymmetry in  
94 mitosis is necessary to establish molecularly distinct centrosomes, asymmetric MTOC activity and  
95 centrosome positioning.

## 96 **Results**

### 97 **Neuroblast centriole duplication starts in interphase and completes in mitosis**

98 To determine the onset of centrosome asymmetry establishment in larval neuroblast, we first investigated  
99 the centriole replication cycle (Supplementary Fig.1c). In vertebrate cells, centrioles replicate in  
100 interphase and convert to functional centrosomes during mitosis (reviewed in <sup>3,4,23</sup>) but it is unclear  
101 whether this also applies to fly neuroblast. We used 3D-Structured Illumination Microscopy (3D-SIM),  
102 which has approximately twice the spatial resolution of standard confocal microscopy, and stained third  
103 instar neuroblasts with known centriolar and centrosomal markers. For all the 3D-SIM experiments, the  
104 cell cycle stages were determined based on the organization of the microtubule network (Supplementary  
105 Fig.1b). We used Asl in conjunction with Sas-6 to determine the onset of cartwheel duplication and  
106 centriole conversion during the neuroblast cell cycle (Supplementary Fig.1c). Consistent with previous  
107 reports <sup>1,24-26</sup> we found that Sas-6 was localized to the centriolar cartwheel whereas Asterless (Asl)  
108 surrounded the centriolar wall (Supplementary Fig.1d). Asl has been shown to extend from the core  
109 centriolar region into the adjacent PCM and sequentially loads onto the new centriole during centriole-to-  
110 centrosome conversion (also referred to as mitotic centriole conversion), a mechanism generating a  
111 centriole-duplication and PCM-assembly competent centrosome <sup>25,27,28</sup>. Apical and basal interphase  
112 neuroblast centrosomes contained two Sas-6<sup>+</sup> cartwheels but only one Asl<sup>+</sup> centriole (Supplementary  
113 Fig.1d, yellow arrowhead). From prometaphase onwards, Asl gradually appeared around the second  
114 cartwheel to form a pair of fully formed centrioles. In telophase, centrioles seemed to lose their  
115 orthogonal conformation, possibly due to disengagement before migration. Cartwheels started to  
116 duplicate in late telophase, manifested in the appearance of a third Sas-6 positive cartwheel (blue  
117 arrowhead in Supplementary Fig.1d). Based on these data we conclude that in third instar larval  
118 neuroblasts centriolar cartwheels are duplicated in early interphase, forming a new procentriole. This  
119 procentriole subsequently converts into a mature centriole during mitosis through progressive loading of  
120 Asl. Thus, by the end of telophase, both neuroblast centrosomes contain an older mother and younger  
121 daughter centriole, separating in the following early interphase.

122 **Asymmetric Cnb localization is established in early mitosis through dynamic exclusion from the**  
123 **mother centriole and enrichment on the daughter centriole**

124 Molecular and functional centrosome asymmetry is detectable in interphase neuroblasts but when and  
125 how this asymmetry is established is unclear (Supplementary Fig.1c). To this end, we analyzed the  
126 localization of YFP::Cnb<sup>11</sup> with 3D-SIM throughout mitosis. As expected, YFP::Cnb was localized with  
127 Asl on the active, apical centrosome in interphase neuroblasts but absent on the basal interphase  
128 centrosome (Fig. 1a-d). To our surprise, we also found apical - but never basal - prophase and  
129 prometaphase centrosomes where Cnb was localized on both centrioles (green arrowheads and bars in  
130 Fig. 1b & Fig. 1g). However, Cnb was predominantly localized on one centriole only from metaphase  
131 onward (brown arrowheads and bars in Fig. 1b & Fig. 1g). On the basal centrosome, Cnb appeared in  
132 prophase and was consistently localized to a single centriole in all subsequent mitotic stages (Fig. 1d, g).  
133 Since Asl sequentially loads onto the forming daughter centriole<sup>25,29</sup>, we tested whether Asl can be used  
134 as an independent marker for centriolar age. To this end, we calculated the Asl intensity ratio between  
135 both centrioles (see methods) – on the apical and basal centrosome - for all mitotic stages where we could  
136 find a clear Cnb asymmetry (Asl intensity ratio of Cnb<sup>+</sup>/Cnb<sup>-</sup> from prometaphase until telophase). These  
137 calculations revealed a clear Asl intensity asymmetry with the Cnb<sup>+</sup> centriole always containing less Asl  
138 and the Cnb<sup>-</sup> more Asl (Fig. 1e).

139 Using the Asl intensity ratio as a method to distinguish between mother and daughter centrioles,  
140 we next correlated Cnb localization with centriolar age at all mitotic stages. We found that in prophase –  
141 when Cnb was detectable on both centrioles – Cnb was predominantly associated with the centriole  
142 containing more Asl (the mother centriole). However, during prometaphase, more Cnb was localized on  
143 the centriole containing less Asl (the daughter centriole). Cnb was sometimes visible before Asl was  
144 robustly recruited to the daughter centriole (green arrowheads in second column of Fig. 1b). From  
145 metaphase until mitosis exit, Cnb was strongly enriched or exclusively present on the daughter centriole  
146 (brown bars and arrowheads Fig. 1b, d, f, g).

147 From these data, we conclude that neuroblast centrosomes generate two molecularly distinct  
148 centrioles during early mitosis. The dynamics generating this centriole asymmetry differ between the  
149 apical and basal centrosomes: on the apical centrosome, Cnb is initially only present on the mother  
150 centriole before appearing on the daughter, and disappearing on the mother centriole. In contrast, Cnb  
151 directly appears on the daughter centriole of the basal centrosome. This establishment of molecular  
152 centriole asymmetry occurs during the centriole-to-centrosome conversion period.

153

#### 154 **The daughter centriole's Cnb partially originates from the mother centriole**

155 We next investigated Cnb relocalization dynamics, considering the following two non-exclusive  
156 hypotheses: (1) Cnb could directly relocalize from the mother to the newly forming daughter centriole  
157 during mitosis. (2) Alternatively, Cnb could be downregulated on the mother and upregulated on the  
158 daughter centriole during mitosis, implying that newly recruited Cnb contributes to the apparent  
159 relocalization pattern (Fig. 2a). To distinguish between these scenarios, we needed to determine the origin  
160 of the daughter centriole specific Cnb pool. To this end, we first performed live cell imaging of  
161 endogenously tagged Cnb::EGFP (see methods) in conjunction with the mitotic spindle marker  
162 mCherry::Jupiter<sup>16</sup>. We found that in late interphase, prior to mitotic entry, Cnb was strongly localized on  
163 the apical neuroblast centrosome. At this cell cycle stage, the apical centrosome only consists of a single  
164 Asl<sup>+</sup> mother centriole (Supplementary Fig.1d). Subsequently, Cnb got downregulated as the neuroblast  
165 entered mitosis and Cnb levels were lowest between prometaphase and anaphase. Cnb intensity then  
166 increased again from anaphase onward (Fig. 2b, c). To test whether daughter centriole Cnb originates  
167 from the mother centriole, or is recruited from other sources, we performed Fluorescence Recovery After  
168 Photobleaching (FRAP) experiments. Bleaching Cnb on the apical centrosome in late interphase or early  
169 prophase extinguished Cnb fluorescence, which only recovered from anaphase onward (Fig. 2d-f). We  
170 also tagged Cnb endogenously with mDendra2 (see also below) but the signal was too low to perform  
171 photoconversion experiments. Regardless, the lack of Cnb fluorescence recovery during mitosis indicates  
172 that very little to no new Cnb is recruited to the apical centrosome prior to anaphase. Recovery of Cnb

173 after anaphase onset suggests the existence of a Cnb protein pool different from the Cnb initially localized  
174 to the apical mother centriole. Taken together, we conclude that Cnb on the daughter centriole is  
175 composed of Cnb originating from the mother centriole in early mitosis and newly recruited Cnb from  
176 anaphase onward (Fig. 2g).

177

178 **Polo dependent phosphorylation of Cnb is necessary for a timely relocation of Cnb from the**  
179 **mother to the daughter centriole**

180 Previously, it was shown that Cnb is a substrate of Polo<sup>18</sup>. We thus tested whether Cnb's dynamic  
181 relocation depends on Polo phosphorylation by analyzing YFP::Cnb localization in hypomorphic *polo*  
182 mutant neuroblasts (*polo*<sup>16-1</sup>/*polo*<sup>1</sup>). In addition, we analyzed the localization of YFP::Cnb<sup>T4A,T9A,S82A</sup>, a  
183 mutant version of Cnb in which all three consensus phosphorylation sites for Polo were substituted by  
184 alanine<sup>18</sup>, in *cnb* mutant neuroblasts. Since we cannot accurately distinguish between apical and basal  
185 centrosomes in *polo* mutants, or *cnb* mutants expressing YFP::Cnb<sup>T4A,T9A,S82A</sup>, we will refer to them as  
186 centrosome 1 and centrosome 2. In contrast to prophase wild type or control (*polo*/+ heterozygotes)  
187 neuroblasts, showing no Cnb on the mother centriole of the basal centrosome (Fig. 1; Supplementary Fig.  
188 2c), we found *polo* mutant neuroblasts containing weak Cnb on the mother centriole of both prophase  
189 centrosomes (44%, light blue and green arrowheads and bars, centrosome 2, Supplementary Fig.2a, b, d).  
190 In prometaphase and metaphase neuroblasts Cnb appeared on both centrioles on centrosome 1 and 2  
191 (prometaphase: 14.8%; n = 27; metaphase: 18.8%; n =16) (light blue and green arrowheads and bars,  
192 centrosome 2, Supplementary Fig.2a, b and D) but from anaphase onward was predominantly localized  
193 on the mother centriole. Taken together, Cnb relocation occurs but is delayed in *polo* hypomorphic  
194 mutant neuroblasts (Supplementary Fig.2a-d).

195 A similar, albeit stronger phenotype was observed in *cnb* mutant neuroblasts expressing  
196 YFP::Cnb<sup>T4A,T9A,S82A</sup>; neuroblasts containing Cnb<sup>+</sup> mother centrioles on both centrosomes were found for  
197 all mitotic stages. Similar to Cnb in *polo* mutant neuroblasts, phosphomutant Cnb was detectable on both  
198 centrosomes in early prophase neuroblasts (e.g centrosome 2: 68.6%; n = 19; light blue and green



199 arrowheads and bars) (Fig. 3a-c). Due to their resemblance to apical wild type centrosomes in regard of  
200 Cnb localization, we refer to these centrosomes as “apical-like”. In most wild type neuroblasts, Cnb was  
201 relocalized by metaphase but in *cnb* mutant neuroblasts expressing YFP::Cnb<sup>T4A,T9A,S82A</sup>, 71.4% (n = 7;  
202 light blue, centrosome 1) of analyzed neuroblasts show incomplete Cnb relocalization on one centrosome  
203 by telophase (Fig. 3a-c).

204 The establishment of molecularly distinct centrioles during mitosis could determine centrosome  
205 asymmetry in the following interphase. If so, we would expect that in cases with a strong Cnb  
206 relocalization delay, as shown for Cnb phosphomutants, we should find two Cnb<sup>+</sup> interphase centrosomes  
207 (Fig. 3d, e). Indeed, in contrast to wild type, control (*polo/+*) or hypomorphic *polo* mutant neuroblasts, ~  
208 75% of *cnb* mutant neuroblasts expressing YFP::Cnb<sup>T4A,T9A,S82A</sup> contain two Cnb<sup>+</sup> interphase centrosomes  
209 (Fig. 3f, g; Supplementary Fig.2e-g). To more directly visualize the origin of the two Cnb<sup>+</sup> interphase  
210 centrosomes, we imaged *cnb* mutants expressing YFP::Cnb<sup>T4A,T9A,S82A</sup> live. Unfortunately, we could not  
211 obtain reliable live 3D-SIM data and our spinning disc live cell imaging setup cannot resolve individual  
212 centrioles during mitosis. However, we reasoned that we could visualize two Cnb<sup>+</sup> centrioles when the  
213 mother and daughter centrioles separate from each other at the end of telophase (Supplementary Fig.1a).  
214 Indeed, in contrast to wild type, retaining a single Cnb<sup>+</sup> centriole on the apical cortex in most neuroblasts  
215 (75%; n = 20), we found two separating Cnb<sup>+</sup> centrioles in most *cnb* mutants expressing  
216 YFP::Cnb<sup>T4A,T9A,S82A</sup> (73%; n = 22; Fig. 3h-j). This data suggests that incomplete relocalization of  
217 phosphomutant Cnb from the mother to the daughter centriole during mitosis gives rise to two Cnb<sup>+</sup>  
218 centrioles by the end of telophase. In contrast to wild type, this incomplete phosphomutant Cnb  
219 relocalization will result in neuroblasts reentering the next mitosis with Cnb<sup>+</sup> on both centrosomes. Taken  
220 together, we conclude that Polo dependent phosphorylation of Cnb is necessary for Cnb’s timely  
221 relocalization from the mother to the daughter centriole, and that the establishment of molecularly distinct  
222 centrioles during mitosis determines subsequent molecular interphase asymmetry.

223

224

225 **Polo becomes enriched on the daughter centriole whereas Plp remains localized on the mother**  
226 **centriole**

227 Having implicated Polo in Cnb's mother – daughter centriole relocalization we then analyzed the  
228 localization of Polo (Polo::GFP) and Plp (Plp::EGFP). The latter has previously been shown to be  
229 involved in centrosome asymmetry establishment<sup>21</sup>. Both Polo and Plp were GFP-tagged at the  
230 endogenous locus (<sup>30</sup> and methods). In early prophase neuroblasts, Polo was localized on the existing  
231 centriole on both centrosomes (Fig. 4a, b & <sup>19</sup>). Subsequently, Polo intensity increased on the forming  
232 daughter centriole and its asymmetric localization peaked in metaphase/anaphase. Interestingly, the apical  
233 centrosome showed a less pronounced asymmetric distribution in prometaphase compared to the basal  
234 centrosome, which could reflect differences in the relocalization mechanism (Fig. 4a-c).

235 In contrast to Polo and Cnb, Plp predominantly remained localized on the mother centriole on both  
236 centrosomes, although it increased also on the daughter centriole in late mitosis (Supplementary Fig.3).  
237 Co-imaging Polo together with Plp, and Cnb with Plp showed that Polo and Cnb separated from Plp in  
238 metaphase and anaphase (Fig. 4d, e). These data suggest that similar to Cnb on the apical centrosome,  
239 Polo is changing its localization from the mother to the daughter centriole during mitosis. However, in  
240 contrast to Cnb, Polo's relocalization dynamics appear similar on both centrosomes. Plp remains enriched  
241 on the mother centriole on both the basal and apical centrosome.

242

243 **Polo's relocalization to the daughter centriole depends on Wdr62 and Cnb, with Polo and Cnb co-**  
244 **depending on each other**

245 We next asked how asymmetric Polo localization establishment is regulated. To this end, we analyzed  
246 Polo localization in neuroblasts depleted for Cnb (*cnb* RNAi) and Wdr62 (*wdr62* mutants). Wdr62 is  
247 implicated in primary microcephaly<sup>31,32</sup>, and both Cnb and Wdr62 are necessary for MTOC asymmetry  
248 by regulating Polo's and Plp's centrosomal localization in interphase neuroblasts<sup>18,19</sup>. Lack of Cnb or  
249 Wdr62 did not compromise the gradual loading of Asl onto the newly formed centriole in mitotic  
250 neuroblasts and Plp localization was still highly asymmetric in favor of the mother centriole (data not

251 shown). However, the asymmetric centriolar localization of Polo, especially in prometaphase to anaphase  
252 neuroblasts, was significantly perturbed in the absence of Cnb and Wdr62 (Fig. 5a-c). Lack of Cnb - but  
253 not Wdr62 - also compromised Polo's asymmetric localization in telophase, suggesting a preferential  
254 requirement for Wdr62 in metaphase and anaphase.

255 Our *polo* mutant, Cnb phosphomutant and Cnb RNAi data are consistent with previous studies,  
256 indicating a co-dependency of Polo and Cnb<sup>18,21</sup>. To test whether Cnb mislocalization is sufficient to  
257 prevent Polo relocalization to the daughter centriole, we expressed mCherry::Cnb::PACT (see Methods)  
258 together with Polo::EGFP (tagged endogenously, using CRISPR/Cas9 technology; see methods). Since  
259 our 3D-SIM data showed Plp to be predominantly associated with the mother centriole, we reasoned that  
260 tethering Cnb to the mother centriole with Plp's PACT domain<sup>33</sup> would compromise the establishment of  
261 a Cnb<sup>-</sup> mother and Cnb<sup>+</sup> daughter centriole. We speculated that Cnb's localization would remain enriched  
262 on the mother centriole or at least become near symmetrically localized. Indeed, our 3D-SIM experiments  
263 revealed that mCherry::Cnb::PACT or YFP::Cnb::PACT<sup>18</sup> failed to properly relocalize from the mother  
264 to the daughter centriole and remained associated with the mother centriole (Fig. 5d & Supplementary  
265 Fig.4a, b). Tethering the PACT domain to Cnb prevented the establishment of a high daughter/mother  
266 centriole Polo asymmetry. Polo::EGFP was either localized symmetrically (with equal amounts on both  
267 the mother or daughter centriole) or, as observed in most cases, inverted asymmetrically (with higher  
268 Polo::EGFP amounts on the mother centriole) (Fig. 5d-e). Taken together, loss or mislocalization of Cnb  
269 and depletion of *wdr62* significantly increased the number of centrosomes with inverted Polo asymmetry  
270 ratios (wild type control: 8.6% and 2%, respectively; *cnb* RNAi: 40%; *wdr62*: 31.5%; Cnb::PACT:  
271 97.8%; Fig. 5f, g). We conclude that Wdr62 and Cnb are necessary to establish 'low-Polo' mother and  
272 'high-Polo' daughter centriole containing centrosomes during mitosis. Furthermore, Polo and Cnb both  
273 co-depend on each other to correctly establish this centriolar asymmetry.

274

275

276 **Disrupting centriolar asymmetry impacts biased MTOC activity in interphase and spindle**  
277 **orientation in metaphase**

278 Next, we set out to investigate the significance of centriole asymmetry establishment by preventing the  
279 relocalization of Cnb and Polo from the mother to the daughter centriole using the PACT domain (see  
280 above). It was previously shown that expression of YFP::Cnb::PACT in neuroblasts converted the  
281 inactive mother interphase centrosome into an active MTOC, resulting in the presence of two active  
282 interphase MTOCs<sup>18</sup> (Supplementary Fig.4c, Movie 1&2). However, the underlying mechanisms have  
283 not been further investigated. We hypothesized that fusing Cnb with the PACT domain affects the correct  
284 establishment of molecular centrosome asymmetry during mitosis, manifested in symmetric MTOC  
285 activity in the subsequent interphase. To test this hypothesis, we developed a nanobody trapping  
286 experiment, using the anti-GFP single domain antibody fragment (vhhGFP4)<sup>34,35</sup> fused to the PACT  
287 domain of Plp<sup>33</sup> to predominantly trap GFP- or YFP-tagged proteins on the mother centriole  
288 (Supplementary Fig.5a-c). Expressing PACT::vhhGFP4 in neuroblasts together with YFP::Cnb mimics  
289 the YFP::Cnb::PACT phenotype; almost 93% (n = 69) of neuroblasts expressing PACT::vhhGFP4  
290 together with YFP::Cnb showed two active interphase MTOCs (YFP::Cnb expression only: no MTOC  
291 gain of function observed; n = 16; Supplementary Fig.5d, E; Movie 3). Conversely, trapping Asl::GFP  
292 with PACT::vhhGFP4 on the mother centriole did not cause a MTOC phenotype in 83% of neuroblasts (n  
293 = 104; Supplementary Fig.5f, g; Movie 4).

294 Having validated the nanobody tool, we next co-expressed a GFP-tagged version of Polo – either a  
295 published GFP::Polo transgene<sup>36</sup> or our endogenously tagged CRISPR Polo::EGFP line – with  
296 PACT::vhhGFP4. 3D-SIM data revealed that under these experimental conditions, Polo::EGFP was  
297 strongly localized to the mother centriole in prophase. Subsequently, Polo::EGFP was symmetrically  
298 localized between mother and daughter centriole from prometaphase onwards (Supplementary Fig.6a, b).  
299 Nanobody-mediated trapping of Polo on the mother centriole also induced the formation of two active  
300 interphase MTOCs (GFP::Polo transgene: 84%; n = 31. Polo::EGFP CRISPR line: 72%; n = 82)  
301 (Supplementary Fig.5h, i, Supplementary Fig.6c-e & Movie 5-7). Although cell cycle progression was not

302 affected in these neuroblasts, we measured a significant misorientation of the mitotic spindle in early  
303 metaphase (Supplementary Fig.6f-g, i). However, similar to *bld10* mutant neuroblasts, displaying two  
304 active interphase MTOCs also <sup>20</sup>, mitotic spindles realigned along the apical-basal polarity axis, ensuring  
305 normal asymmetric cell divisions along a conserved axis between successive mitoses (Supplementary  
306 Fig.6h, j). 3D-SIM imaging also revealed that in Polo::EGFP & vhhGFP4::PACT expressing neuroblast,  
307 both interphase centrosomes (now containing one centriole each) contain high levels of centriolar and  
308 diffuse PCM Polo, consistent with our recent observation for the apical interphase wild type centrosome  
309 <sup>19</sup> (Supplementary Fig.6k, l). Based on these experiments we conclude that preventing the normal  
310 establishment of Cnb and Polo asymmetry using the PACT domain perturbs biased MTOC activity in  
311 interphase.

312

### 313 **Optogenetically induced Polo and Cnb trapping during mitosis affects MTOC activity in the** 314 **subsequent interphase**

315 Based on these nanobody results, we reasoned that trapping Polo and Cnb on the mother centriole at  
316 defined cell cycle stages should allow us to test more specifically whether the establishment of Polo and  
317 Cnb asymmetry during mitosis has an impact on MTOC activity in the subsequent interphase. To test this  
318 hypothesis, we implemented the optogenetic system iLID <sup>37</sup> by generating transgenic flies containing the  
319 iLID cassette (containing the *Avena Sativa*'s LOV domain) fused with the PACT domain (*UAS-*  
320 *iLID::PACT::HA*; *UAS-iLID::PACT::GFP*; see methods). iLID (or SsrA) binds to the small SspB domain  
321 under blue light exposure <sup>37</sup>. To test this system in fly neuroblasts, we expressed cytoplasmic  
322 SspB::mCherry together with iLID::PACT::GFP and exposed entire larval brains first to yellow (561nm)  
323 light, followed by simultaneous blue and yellow light (488 and 561nm) exposure, before switching back  
324 to only 561nm; each exposure period lasted 5 minutes. Blue light exposure was sufficient to induce the  
325 recruitment of cytoplasmic SspB::mCherry to neuroblast centrioles containing iLID::PACT::GFP within  
326 15 seconds. This behavior is strictly blue-light dependent as imaging with 561nm alone is not sufficient

327 to recruit SspB::mCherry to centrioles and SspB::mCherry relocated to the cytoplasm within 100s after  
328 blue light exposure was shut off (Supplementary Fig.7a).

329 Next, we generated *SspB::EGFP::Polo* and *SspB::mDendra2::Cnb* flies using CRISPR/Cas9. We reared  
330 embryos, expressing iLID::PACT::HA under the control of the neuroblast specific *worGal4* driver  
331 together with SspB::EGFP::Polo or SspB::mDendra2::Cnb in the dark for 4 days before exposing third  
332 instar larval neuroblasts in intact brains to blue light at different cell cycle stages for 10-20 minutes.  
333 Subsequently, we monitored MT dynamics using mCherry::Jupiter for ~ 90 minutes without blue light  
334 exposure. If the dynamic relocation of Polo and Cnb during mitosis is important for the correct MTOC  
335 establishment in the subsequent interphase (interphase 2), we would expect that light-dependent  
336 manipulation of Cnb and Polo localization would mimic the nanobody phenotype, resulting in two active  
337 MTOCs in interphase 2. Indeed, many neuroblasts, exposed to blue light from late interphase 1 or  
338 prophase 1 onward, showed two active MTOCs in the following interphase 2. However, continued blue  
339 light exposure during interphase – early interphase in particular - also disrupted MTOC asymmetry in late  
340 interphase just prior to mitotic entry (Fig. 6a-c). Overall, ~ 55 % of SspB::EGFP::Polo &  
341 iLID::PACT::HA and ~ 47 % of SspB::mDendra2::Cnb & iLID::PACT::GFP expressing neuroblasts,  
342 exposed to blue light showed an MTOC phenotype (n = 67 and n = 40, respectively; Fig. 6d, e). We  
343 restricted the analysis to neuroblasts showing an MTOC phenotype since the efficiency of optogenetic  
344 recruitment is variable making a negative result difficult to interpret. SspB::EGFP::Polo also displayed a  
345 more focused and intense localization when co-expressed with iLID::PACT::HA and exposed to blue  
346 light, compared to normal SspB::EGFP::Polo localization (Supplementary Fig.7b). These observed  
347 phenotypes are strictly blue light dependent as SspB::EGFP::Polo or SspB::mDendra2::Cnb expressed in  
348 conjunction with iLID::PACT and imaged with 561nm only, showed predominantly normal MTOC  
349 activity (SspB::Polo: 87.8% normal divisions; n = 29; SspB::Cnb: 82.3% normal divisions; n = 36; Fig.  
350 6d, e). Taken together, these experiments suggest that perturbing normal Cnb and Polo relocation  
351 during mitosis disrupts asymmetric MTOC behavior in the following interphase. The data further

352 indicates that neuroblasts are also sensitive to optogenetic manipulation of Cnb and Polo localization  
353 during interphase.

354 **Discussion**

355 Centrosome asymmetry has previously been described to occur in asymmetrically dividing *Drosophila*  
356 neural stem cells (neuroblasts), manifested in biased interphase MTOC activity and asymmetric  
357 localization of the centrosomal proteins Cnb, Plp and Polo<sup>11,18-21</sup>. Here, we have shown that neuroblast  
358 centrosomes become intrinsically asymmetric by relocalizing centriolar proteins such as Cnb and Polo  
359 from the old mother to the young daughter centriole during mitosis. This establishment of centriolar  
360 asymmetry is tightly linked to centriole-to-centrosome/mitotic centriole conversion<sup>25,27</sup>. In early  
361 prophase, Cnb and Polo colocalize on the existing mother centriole of the apical centrosome but from late  
362 prometaphase onward, Cnb and Polo are exclusively (in the case of Cnb) or predominantly (in the case of  
363 Polo) localized on the daughter centriole. Interestingly, Cnb behaves differently on the basal centrosome:  
364 the existing mother centriole does not contain any Cnb, appearing only on the forming daughter centriole  
365 in late prophase. On the apical centrosome however, Cnb is often present on the mother and daughter  
366 centriole between late prophase and early prometaphase. Mechanistically, the relocalization could entail a  
367 direct translocation of Cnb and Polo from the mother to the daughter centriole. This model is partially  
368 supported by our FRAP data. However, on the basal centrosome, Cnb is completely absent from the  
369 existing mother, and appears only in late prophase on the forming daughter centriole. This suggests a  
370 direct recruitment mechanism, which could also apply to the apical centrosome from anaphase onward.  
371 We propose a dual mechanism whereby on the apical centrosome Cnb initially directly transfers from the  
372 mother to the daughter centriole. From anaphase onward – and from late prophase onward on the basal  
373 daughter centriole – Cnb levels increase through direct recruitment (Fig. 6f, g). Cnb is phosphorylated by  
374 the mitotic kinase Polo<sup>18</sup> and Polo-dependent phosphorylation of Cnb is necessary for its timely  
375 relocalization during mitosis, suggesting that Polo regulates the dynamic relocalization of Cnb from the  
376 mother to the daughter centriole. Interestingly, our data further suggest that Polo, which also becomes  
377 enriched on the daughter centriole during mitosis is co-dependent with Cnb, while also requiring Wdr62.  
378 Polo's involvement in mitotic centriole conversion<sup>27</sup> further suggests that the same molecular machinery



379 cooperatively converts a maturing centriole into a centrosome for the next cell cycle while simultaneously  
380 providing it with its unique molecular identity (Fig. 7a - c).

381         The mechanisms generating two molecularly distinct centrioles during mitosis seem to directly  
382 influence the centrosome's MTOC activity in interphase; the 'Cnb<sup>+</sup>, high Polo' daughter centriole will  
383 retain MTOC activity during interphase whereas the 'Cnb<sup>-</sup>, low Polo' mother centriole, separates from its  
384 daughter in early interphase and becomes inactive<sup>18-21,38</sup>. This model is in agreement with *bld10* or *plp*  
385 mutants, which fail to downregulate Polo from the mother centriole, resulting in the formation of two  
386 active interphase MTOCs<sup>20,21</sup>. It is further supported by our mislocalization data. For example,  
387 optogenetic manipulation of Polo and Cnb asymmetry specifically during mitosis impacts MTOC activity  
388 in the subsequent interphase. However, we cannot exclude the possibility that MTOC asymmetry is also  
389 controlled independently of mitotic centrosome asymmetry establishment since optogenetic interphase  
390 manipulations of Polo and Cnb alone can also perturb biased MTOC activity.

391         Loss of Wdr62 or Cnb also affects asymmetric centriolar Polo localization. Yet, interphase  
392 centrosomes lose their activity in these mutants. *wdr62* mutants and *cnb* RNAi neuroblasts both show low  
393 Polo levels in interphase<sup>19</sup>. We thus hypothesize that in addition to an asymmetric distribution, Polo  
394 levels must remain at a certain level to maintain interphase MTOC activity; high symmetric Polo results  
395 in two active interphase MTOCs whereas low symmetric Polo results in the formation of two inactive  
396 centrosomes. Indeed, our optogenetic experiment revealed increased centriolar Polo levels upon blue light  
397 induction, suggesting that both Polo levels and distribution influence MTOC activity.

398         Taken together, the results reported here are consistent with a model, proposing that the  
399 establishment of two molecularly distinct centrioles is primed during mitosis, and contributes to biased  
400 MTOC activity in the subsequent interphase. Wild type neuroblasts unequally distribute a given pool of  
401 Cnb and Polo protein between the two centrioles so that the centriole inheriting high amounts of Cnb and  
402 Polo will retain MTOC activity. Furthermore, the dynamic relocalization of Polo and Cnb provides a  
403 molecular explanation for why the daughter centriole-containing centrosome remains tethered to the  
404 apical neuroblast cortex and is being inherited by the self-renewed neuroblast<sup>19-21</sup> (Fig. 7a). It remains to

405 be tested why neuroblasts implemented such a robust machinery to asymmetrically segregate the  
406 daughter-containing centriole to the self-renewed neuroblast; more refined molecular and behavioral  
407 assays will be necessary to elucidate the developmental and post-developmental consequences of biased  
408 centrosome segregation. The tools and findings reported here will be instrumental in targeted  
409 perturbations of intrinsic centrosome asymmetry with spatiotemporal precision in defined neuroblast  
410 lineages.

411 Finally, our observations reported here further raise the tantalizing possibility that centriolar  
412 proteins also dynamically relocalize in other stem cells, potentially providing a mechanistic explanation  
413 for the differences in centriole inheritance across different stem cell systems.

414 **References**

- 415 1. Mennella, V. *et al.* Subdiffraction-resolution fluorescence microscopy reveals a domain of the  
416 centrosome critical for pericentriolar material organization. *Nat. Cell Biol.* **14**, 1159–1168 (2012).
- 417 2. Nigg, E. A. & Raff, J. W. Centrioles, Centrosomes, and Cilia in Health and Disease. *Cell* **139**,  
418 663–678 (2009).
- 419 3. Conduit, P. T. & Raff, J. W. Centrosome function and assembly in animal cells. *Nat. Rev. Mol.*  
420 *Cell Biol.* **16**, 611–624 (2015).
- 421 4. Fu, J., Hagan, I. M. & Glover, D. M. The Centrosome and Its Duplication Cycle. *Cold Spring*  
422 *Harb Perspect Biol* **7**, (2015).
- 423 5. Jakobsen, L. *et al.* Novel asymmetrically localizing components of human centrosomes identified  
424 by complementary proteomics methods. *EMBO J.* **30**, 1520–1535 (2011).
- 425 6. Lambert, J. D. & Nagy, L. M. Asymmetric inheritance of centrosomally localized mRNAs during  
426 embryonic cleavages. *Nature* **420**, 682–686 (2002).
- 427 7. Tozer, S., Baek, C., Fischer, E., Gojame, R. & Morin, X. Differential Routing of Mindbomb1 via  
428 Centriolar Satellites Regulates Asymmetric Divisions of Neural Progenitors. *Neuron* **93**, 542–  
429 551.e4 (2017).
- 430 8. Reina, J. & Gonzalez, C. When fate follows age: unequal centrosomes in asymmetric cell division.  
431 *Phil. Trans. R. Soc. B* **369**, 20130466–20130466 (2014).
- 432 9. Wang, X. *et al.* Asymmetric centrosome inheritance maintains neural progenitors in the neocortex.  
433 *Nature* **461**, 947–955 (2009).
- 434 10. Yamashita, Y. M., Mahowald, A. P., Perlin, J. R. & Fuller, M. T. Asymmetric inheritance of  
435 mother versus daughter centrosome in stem cell division. *Science* **315**, 518–521 (2007).
- 436 11. Januschke, J., Llamazares, S., Reina, J. & Gonzalez, C. Drosophila neuroblasts retain the daughter  
437 centrosome. *Nat Commun* **2**, 243 (2011).
- 438 12. Conduit, P. T. & Raff, J. W. Cnn dynamics drive centrosome size asymmetry to ensure daughter  
439 centriole retention in Drosophila neuroblasts. *Curr. Biol.* **20**, 2187–2192 (2010).
- 440 13. Salzmann, V. *et al.* Centrosome-dependent asymmetric inheritance of the midbody ring in  
441 Drosophila germline stem cell division. **25**, 267–275 (2014).
- 442 14. Rebollo, E. *et al.* Functionally unequal centrosomes drive spindle orientation in asymmetrically  
443 dividing Drosophila neural stem cells. *Dev. Cell* **12**, 467–474 (2007).
- 444 15. Cheng, J. *et al.* Centrosome misorientation reduces stem cell division during ageing. *Nature* **456**,  
445 599–604 (2008).
- 446 16. Cabernard, C. *et al.* Apical/basal spindle orientation is required for neuroblast homeostasis and  
447 neuronal differentiation in Drosophila. *Dev. Cell* **17**, 134–141 (2009).
- 448 17. Rusan, N. M. & Peifer, M. A role for a novel centrosome cycle in asymmetric cell division. *J Cell*  
449 *Biol* **177**, 13–20 (2007).
- 450 18. Januschke, J. *et al.* Centrobin controls mother–daughter centriole asymmetry in Drosophila  
451 neuroblasts. *Nat. Cell Biol.* **15**, 241–248 (2013).
- 452 19. Ramdas Nair, A. *et al.* The Microcephaly-Associated Protein Wdr62/CG7337 Is Required to  
453 Maintain Centrosome Asymmetry in Drosophila Neuroblasts. *Cell Rep* **14**, 1100–1113 (2016).
- 454 20. Singh, P., Ramdas Nair, A. & Cabernard, C. The centriolar protein Bld10/Cep135 is required to  
455 establish centrosome asymmetry in Drosophila neuroblasts. *Curr. Biol.* **24**, 1548–1555 (2014).
- 456 21. Lerit, D. A. & Rusan, N. M. PLP inhibits the activity of interphase centrosomes to ensure their  
457 proper segregation in stem cells. *J. Cell Biol.* **202**, 1013–1022 (2013).
- 458 22. Lerit, D. A. *et al.* Interphase centrosome organization by the PLP-Cnn scaffold is required for  
459 centrosome function. *J. Cell Biol.* **210**, 79–97 (2015).
- 460 23. Nigg, E. A. & Stearns, T. The centrosome cycle: Centriole biogenesis, duplication and inherent  
461 asymmetries. *Nat. Cell Biol.* **13**, 1154–1160 (2011).
- 462 24. Fu, J. & Glover, D. M. Structured illumination of the interface between centriole and peri-  
463 centriolar material. *Open Biology* **2**, 120104–120104 (2012).

- 464 25. Fu, J. *et al.* Conserved molecular interactions in centriole-to-centrosome conversion. *Nat. Cell*  
465 *Biol.* **18**, 87–99 (2015).
- 466 26. Galletta, B. J. *et al.* A centrosome interactome provides insight into organelle assembly and  
467 reveals a non-duplication role for Plk4. *Nat Commun* **7**, 12476 (2016).
- 468 27. Novak, Z. A., Gartenmann, L. & Raff, J. W. Cdk1 Phosphorylates Drosophila Sas-4 to Recruit  
469 Polo to Daughter Centrioles and Convert Them to Centrosomes. *Dev. Cell* **37**, 545–557 (2016).
- 470 28. Wang, W.-J., Soni, R. K., Uryu, K. & Tsou, M.-F. B. The conversion of centrioles to centrosomes:  
471 essential coupling of duplication with segregation. *J. Cell Biol.* **193**, 727–739 (2011).
- 472 29. Novak, Z. A., Conduit, P. T. & Raff, J. W. Asterless Licenses Daughter Centrioles to Duplicate for  
473 the First Time in Drosophila Embryos. *Current Biology* **24**, 1276–1282 (2014).
- 474 30. Buszczak, M. *et al.* The carnegie protein trap library: a versatile tool for Drosophila developmental  
475 studies. *Genetics* **175**, 1505–1531 (2007).
- 476 31. Bacino, C. A., Arriola, L. A., Wiszniewska, J. & Bonnen, P. E. WDR62 missense mutation in a  
477 consanguineous family with primary microcephaly. **158A**, 622–625 (2012).
- 478 32. Rupp, V., Rauf, S., Naveed, I., Windpassinger, C. & Mir, A. A novel single base pair duplication  
479 in WDR62 causes primary microcephaly. *BMC Med. Genet.* **15**, 107 (2014).
- 480 33. Gillingham, A. K. & Munro, S. The PACT domain, a conserved centrosomal targeting motif in the  
481 coiled-coil proteins AKAP450 and pericentrin. *EMBO Rep.* **1**, 524–529 (2000).
- 482 34. Saerens, D. *et al.* Identification of a universal VHH framework to graft non-canonical antigen-  
483 binding loops of camel single-domain antibodies. *J. Mol. Biol.* **352**, 597–607 (2005).
- 484 35. Caussinus, E., Kanca, O. & Affolter, M. Fluorescent fusion protein knockout mediated by anti-  
485 GFP nanobody. *Nat Struct Mol Biol* **19**, 117–121 (2011).
- 486 36. Moutinho Santos, T., Sampaio, P., Amorim, I., Costa, M. & Sunkel, C. E. In vivo localisation of  
487 the mitotic POLO kinase shows a highly dynamic association with the mitotic apparatus during  
488 early embryogenesis in Drosophila. *Biology of the Cell* **91**, 585–596 (1999).
- 489 37. Guntas, G. *et al.* Engineering an improved light-induced dimer (iLID) for controlling the  
490 localization and activity of signaling proteins. *Proceedings of the National Academy of Sciences*  
491 **112**, 112–117 (2015).
- 492 38. Januschke, J. & Gonzalez, C. The interphase microtubule aster is a determinant of asymmetric  
493 division orientation in Drosophila neuroblasts. *J. Cell Biol.* **188**, 693–706 (2010).
- 494 39. Albertson, R. Scribble protein domain mapping reveals a multistep localization mechanism and  
495 domains necessary for establishing cortical polarity. *Journal of cell science* **117**, 6061–6070  
496 (2004).
- 497 40. Blachon, S. *et al.* A proximal centriole-like structure is present in Drosophila spermatids and can  
498 serve as a model to study centriole duplication. *Genetics* **182**, 133–144 (2009).
- 499 41. Blachon, S. *et al.* Drosophila asterless and vertebrate Cep152 Are orthologs essential for centriole  
500 duplication. *Genetics* **180**, 2081–2094 (2008).
- 501 42. Sunkel, C. E. & Glover, D. M. polo, a mitotic mutant of Drosophila displaying abnormal spindle  
502 poles. *Journal of cell science* **89 ( Pt 1)**, 25–38 (1988).
- 503 43. Lukinova, N. I., Roussakova, V. V. & Fortini, M. E. Genetic characterization of cytological region  
504 77A-D harboring the presenilin gene of Drosophila melanogaster. *Genetics* **153**, 1789–1797  
505 (1999).
- 506 44. Gratz, S. J. *et al.* Genome engineering of Drosophila with the CRISPR RNA-guided Cas9  
507 nuclease. *Genetics* **194**, 1029–1035 (2013).
- 508 45. Kondo, S. & Ueda, R. Highly Improved Gene Targeting by Germline-Specific Cas9 Expression in  
509 Drosophila. *Genetics* **195**, 715–721 (2013).
- 510  
511  
512

513 **Acknowledgements:**

514 We thank members of the Cabernard lab for helpful discussions. We are grateful to Jordan Raff, Nasser  
515 Rusan, Tomer Avidor-Reiss, Cayetano Gonzalez and Chris Doe for flies and antibodies. We would also  
516 like to thank the Imaging Core Facility (IMCF) at the Biozentrum for technical support and the Nigg and  
517 Affolter labs for providing temporary lab space to E. G. This work was supported by the Swiss National  
518 Science Foundation (SNSF; PP00P3\_159318), the National Institutes of Health (NIH; 1R01GM126029-  
519 01) and start-up funds from the University of Washington. E.G was supported with an EMBO long-term  
520 postdoctoral fellowship (ALTF 378-2015). Stocks obtained from the Bloomington Drosophila Stock  
521 Center (NIH P40OD018537) and the Vienna Drosophila Resource Center (VDRC) were used in this  
522 study.

523

524 **Author contributions:**

525 This study was conceived by A.R.N, P.S, and C.C.  
526 E.G and A.R.N performed most of the 3D-SIM experiments with help from P.S. E.G performed all the  
527 nanobody experiments. A. M generated the PACT::vhhGFP4 and iLID::PACT constructs. N.H generated  
528 the SspB::mDendra::Cnb and SspB::EGFP::Polo constructs and performed the majority of the optogenetic  
529 experiments. T.P wrote custom-made Matlab codes and helped with data analysis. D.S.G generated the  
530 Plp CRISPR line and A.F helped with 3D-SIM imaging. C.C generated and analyzed Cnb phosphomutant  
531 live cell imaging data, FRAP and optogenetic data. E.G, A.R.N and C.C wrote the paper.

532

533 **Competing financial interests:** The authors declare no competing financial interests.

534 **Materials & Correspondence.** Material requests and other inquiries should be directed to  
535 ccabern@uw.edu.



537 **Figure legends**

538

539 **Fig. 1: Cnb relocates from the mother to the daughter centriole in early mitosis on the apical**

540 **centrosome**

541 How centriole duplication and molecular asymmetry are coupled is unclear for both the apical **(a)** and  
542 basal **(c)** centrosome. Representative 3D-SIM images of apical **(b)** and basal **(d)** third instar neuroblast  
543 centrosomes, expressing YFP::Cnb (middle row; white. Green in merge) and stained for Asl (Top row;  
544 white. Magenta in merge). Orange and yellow shapes highlight mother and daughter centrioles,  
545 respectively and were used to measure signal intensities. The numbers indicate the total Cnb asymmetry  
546 ratios (Daughter/Mother centriole). Colored arrowheads and bars underneath the images highlight the  
547 different stages shown in **(g)**. **(e)** For prometaphase to telophase centrosomes (apical and basal combined),  
548 containing a single Cnb<sup>+</sup> centriole, total Asl intensity of the Cnb<sup>+</sup> (presumably the daughter) centriole was  
549 divided by the total Asl intensity of the Cnb<sup>-</sup> (presumably the mother) centriole. Medians are shown with  
550 a red horizontal line. **(f)** Scatter plot showing total Cnb intensity of the daughter centriole (less Asl),  
551 divided by total Cnb intensity on the mother centriole (more Asl). Only apical centrioles containing Cnb  
552 on both centrioles were measured. **(g)** Graph showing the timeline of Cnb's localization dynamics on the  
553 apical and basal centrosome: the bars show the percentage of neuroblasts containing an apical centrosome  
554 containing one centriole Cnb<sup>+</sup> (dark blue), a basal centrosome containing one centriole without Cnb (dark  
555 grey), a centrosome with Cnb on both centrioles (transition stage with a Daughter/Mother ratio < 2; light  
556 green), predominant Cnb localization on the daughter centriole (strong asymmetry with a  
557 Daughter/Mother ratio between 2 and 10; light blue) or in which Cnb is only present on the daughter  
558 centriole (complete asymmetry with a Daughter/Mother ratio > 10; light brown) at defined mitotic stages.  
559 For this and all subsequent cartoons: closed and open circles represent established mother and forming  
560 daughter centrioles, respectively. Cell cycle stages are indicated with colored boxes. Scale bar is 0.3  $\mu$ m.  
561 The data presented here were obtained from five independent experiments.

562

563 **Fig. 2: Cnb localized on the daughter centriole partially originates from the mother centriole**

564 (a) Dynamic mother-daughter centriole relocalization of Cnb could be either due to a direct transfer  
565 mechanism (orange curved arrow) or through up- and downregulation (vertical orange arrows).  
566 Representative unFRAPed (b) and FRAPed (d) wild type neuroblast expressing endogenously tagged  
567 Cnb::EGFP (white; bottom row) together with the microtubule (MT) marker mCherry::Jupiter (white; top  
568 row). The orange brackets highlight the apical centrosome where Cnb::EGFP (bottom row) is measured.  
569 The asterisk refers to an unspecific Cnb::EGFP aggregate. Intensity profile of the unFRAPed (c) and  
570 FRAPped (e) apical Cnb::EGFP signal of the neuroblasts shown in (b) and (d). Colored vertical bars  
571 indicate specific cell cycle stages. The vertical dashed line refers to the timepoint when bleaching was  
572 performed. Cnb fluorescence was normalized against cytoplasmic EGFP levels. (f) Mean intensity plot of  
573 10 unFRAPed and frapped apical centrosomes. Error bars indicate standard deviation of the mean. (g)  
574 Graphical summary for apical Cnb: Cnb levels decrease during prometaphase. The remaining apical Cnb  
575 transfers from the mother to the daughter centriole until anaphase. From anaphase onward, Cnb levels  
576 increase again through recruitment of new Cnb. Time scale is mm:ss. Scale bar in (b) and (d) is 5 $\mu$ m (top  
577 row) and 1 $\mu$ m (bottom row). The data presented here were obtained from three independent experiments.

578

579 **Fig. 3: Cnb's relocalization from the mother to the daughter centriole is controlled by Polo-**  
580 **dependent phosphorylation**

581 Expression of YFP::Cnb<sup>T4A,T9A,S82A</sup> in *cnb* mutant neuroblasts generates two “apical-like” (in respect of  
582 Cnb localization) centrosomes. Because we cannot distinguish between “apical” and “basal” centrosome  
583 anymore, they are labelled centrosome 1 and 2, respectively. Representative 3D-SIM images of the (a)  
584 first and (b) second centrosome of third instar *cnb* mutant larval neuroblasts, expressing  
585 YFP::Cnb<sup>T4A,T9A,S82A</sup> (white; middle row, green; bottom row), a mutant version of Cnb in which all three  
586 consensus phosphorylation sites for Polo were substituted by alanine<sup>18</sup>. Brains were stained for Asl (top  
587 row: white; bottom row: magenta). Orange “M” and yellow “D” stand for mother and daughter centriole



588 respectively. The numbers indicate the Daughter/Mother intensity ration of the representative image.  
589 Colored arrowheads and bars underneath the images highlight the degree of Cnb relocalization (see c). (c)  
590 Graph showing the timeline of Cnb's relocalization at defined mitotic stages in YFP::Cnb<sup>T4A,T9A,S82A</sup>  
591 expressing *cnb* mutant neuroblasts. The bars show the percentage of neuroblasts containing a single Cnb<sup>+</sup>  
592 centriole (dark blue), a single centriole without Cnb (dark grey), Cnb on both centrioles (transition stage  
593 with a Daughter/Mother ratio < 2; light green), predominant Cnb localization on the daughter centriole  
594 (strong asymmetry with a Daughter/Mother ratio between 2 and 10; light blue) or in which Cnb is  
595 completely shifted to the daughter centriole (complete asymmetry with a Daughter/Mother ratio > 10;  
596 light brown). In contrast to wild type Cnb (d), the relocalization of YFP::Cnb<sup>T4A,T9A,S82A</sup> (e) is delayed,  
597 which should give rise to two Cnb<sup>+</sup> interphase centrioles as tested in the following panels. (f) Localization  
598 of YFP::Cnb<sup>T4A,T9A,S82A</sup> in *cnb* mutant interphase neuroblasts. (g) Quantification of interphase neuroblast  
599 phenotype for control (*polo/+*) and Cnb<sup>T4A,T9A,S82A</sup>; *cnb*. These experiments were done twice for  
600 YFP::Cnb<sup>T4A,T9A,S82A</sup>; *cnb*. Representative live cell imaging sequence of a (h) control neuroblast,  
601 expressing wild type YFP::Cnb (green) and (i) *cnb* mutant neuroblast expressing YFP::Cnb<sup>T4A,T9A,S82A</sup>  
602 (green). Both samples also co-express the spindle marker UAS-mCherry::Jupiter (white) to visualize  
603 microtubules. (j) Quantification of centriole splitting phenotype; blue bars represent neuroblasts retaining  
604 a single Cnb<sup>+</sup> centriole on the apical centrosome. Orange bars represent neuroblasts generating two Cnb<sup>+</sup>  
605 centrioles in early interphase. Live cell imaging experiments were repeated 4 times independently. Cell  
606 cycle stages are indicated with colored boxes. Time scale is mm:ss. Scale bar is 0.3 μm in a, b, f and 5μm  
607 (top row) or 2μm (bottom row) in h and i.

608

#### 609 **Fig. 4: Polo and Cnb separate from Plp in mitosis**

610 Representative 3D-SIM images of (a) apical or (b) basal third instar larval neuroblast centrioles,  
611 expressing Polo::GFP (middle row; green in merge). Centriole contours were drawn based on Asl signal  
612 (orange and yellow lines for mother and daughter centriole respectively) and used to measure Polo::GFP

613 (and Asl; not shown) intensities. The numbers represent total Polo intensity ratios (Daughter/Mother  
614 centriole) in the shown image. Polo asymmetry ratios for the apical (red dots) and the basal (blue dots)  
615 centrosome are plotted in (c) from three independent experiments. Medians are shown with a grey  
616 horizontal line. Prophase: apical versus basal;  $p=0.6991$ . Prometaphase: apical versus basal;  $p=5.688 \times 10^{-6}$ .  
617 Metaphase: apical versus basal;  $p=0.9329$ . Anaphase: apical versus basal;  $p=0.8628$ . Telophase: apical  
618 versus basal;  $p=0.8614$ . Representative interpolated images of apical interphase/early prophase and late  
619 metaphase/early anaphase centrosomes, expressing (d) Polo::GFP (green in merge) or (e) YFP::Cnb  
620 (green in merge) and stained for Plp (magenta in merge). These experiments were performed three times  
621 independently for Polo::GFP and once for YFP::Cnb. Cell cycle stages are indicated with colored boxes.  
622 Scale bar is 0.3  $\mu\text{m}$ .

623  
624 **Fig. 5: Polo relocalization from the mother to the daughter centriole during mitosis depends on Cnb**  
625 **and Wdr62.**

626 Representative 3D-SIM images of third instar larval neuroblasts mutant for (a) *wdr62* or (b) expressing  
627 RNAi against Cnb (*cnb* RNAi). In both conditions, Polo::GFP (green in merge) expressing neuroblasts  
628 were stained for Asl (magenta in merge). For all panels, orange “M” and yellow “D” represent mother  
629 and daughter centriole respectively. Polo intensity ratios (Daughter/Mother centriole) are shown in the  
630 representative images and plotted in (c) for control (wild type background; green dots), *cnb* RNAi (beige  
631 dots) and *wdr62* mutants (blue dots). Since apical and basal centrosomes could not be distinguished in  
632 *cnb* RNAi and *wdr62* mutants, measurements from these conditions were compared to the pooled (apical  
633 and basal) control Polo measurements (replotted from Fig. 4c). These experiments were performed three  
634 times independently for wild type control and *cnb* RNAi, and six times for *wdr62*. Medians are shown in  
635 red. Prophase: wild type control versus *cnb* RNAi;  $p=0.6835$ . wild type control versus *wdr62*;  $p=0.1179$ .  
636 Prometaphase: wild type control versus *cnb* RNAi;  $p=0.0318$ . wild type control versus *wdr62*;  $p=0.0439$ .  
637 Metaphase: wild type control versus *cnb* RNAi;  $p=0.0040$ ; wild type control versus *wdr62*;  $p=8.496 \times 10^{-5}$ .  
638 Anaphase: wild type control versus *cnb* RNAi;  $p=4.19 \times 10^{-6}$ . wild type control versus *wdr62*;  $p=1.79 \times 10^{-6}$ .

639 Telophase: wild type control versus *cnb* RNAi;  $p=1.17 \times 10^{-6}$ . wild type control versus *wdr62*;  $p=0.0524$ .  
640 **(d)** Representative 3D-SIM images of third instar larval neuroblast centrosomes, expressing Polo::EGFP  
641 generated by CRISPR/Cas9 technology (white, top row; green bottom row) and mCherry::Cnb::PACT  
642 (white in middle row), stained for Asl (magenta in merge; bottom row). Polo intensity ratios  
643 (Daughter/Mother centriole) are shown in the representative images and plotted in **(e)** for control (wild  
644 type background; green dots) and mCherry::Cnb::PACT expressing neuroblasts (yellow dots). Medians  
645 are shown in red. This experiment was performed two times independently for wild type and  
646 mCherry::Cnb::PACT expressing neuroblast in parallel. Prophase: wild type control versus  
647 mCherry::Cnb::PACT;  $p=1.524 \times 10^{-7}$ . Prometaphase: wild type control versus mCherry::Cnb::PACT;  
648  $p < 1.0 \times 10^{-15}$ . Metaphase: wild type control versus mCherry::Cnb::PACT;  $p=2.0 \times 10^{-15}$ . Anaphase: wild  
649 type control versus mCherry::Cnb::PACT;  $p=1.764 \times 10^{-11}$ . Telophase: wild type control versus  
650 mCherry::Cnb::PACT;  $p=3.854 \times 10^{-6}$ . The percentage of metaphase and anaphase centrosomes with  
651 inverted Polo asymmetry (Daughter/Mother ratio  $< 1$ ) are plotted in **(f)**. **(g)** Summary of phenotypes;  
652 efficient relocalization of Polo from the mother (M) to the daughter (D) centriole is prevented in  
653 neuroblasts devoid of Wdr62 or Cnb, or with mislocalized Cnb. Cell cycle stages are indicated with  
654 colored boxes. Scale bar is 0.3  $\mu\text{m}$ .

655

656

657 **Fig. 6: Establishment of centriolar asymmetry during mitosis is required for biased interphase**

658 **MTOC activity**

659 **(a)** Representative wild type neuroblast expressing SspB::EGFP::Polo (not shown) together with the  
660 microtubule marker mCherry::Jupiter (white) and iLID::PACT::HA (not shown). As indicated with the  
661 cyan and yellow color bars underneath the image sequence, this neuroblast was exposed to both 488nm  
662 and 561nm during the first division but only to 561nm in the second division. Yellow arrowheads indicate  
663 two active MTOCs in the interphase 2 and prophase 2. Summary of all optogenetic experiments for **(b)**  
664 SspB::EGFP::Polo and **(c)** SspB::mDendra2::Cnb and iLID::PACT::HA expressing neuroblasts. Blue

665 light exposure and resulting phenotype are indicated with the colored bars (see legend on the right). This  
666 experiment was repeated more than 3 times independently. Bar graphs representing the phenotypic  
667 penetrance (in %) of larvae expressing (d) SspB::EGFP::Polo & iLID::PACT::HA or (e)  
668 SspB::mDendra2::Cnb & iLID::PACT::GFP with (cyan and yellow bar) or without (yellow bar only) blue  
669 light exposure. The number of scored divisions are indicated on the bars.

670

671 **Fig. 7: Centrosome asymmetry is primed in mitosis through dynamic Cnb and Polo relocalization**

672 (a) Model: Centriolar asymmetry – here shown for Polo (dark and light blue) and Cnb (orange) – occurs  
673 during mitosis, coupled to centriole-to-centrosome/mitotic centriole conversion. Polo and Cnb are  
674 relocalizing from the existing mother to the newly formed daughter centriole on both the apical and basal  
675 centrosome. The ensuing Polo-rich centriole maintains MTOC activity, retaining it in the self-renewed  
676 neuroblast. Details for the apical and basal centrosome are shown in (b). Cnb (orange) and Polo (blue)  
677 relocalize from the mother to the forming daughter centriole from prophase onwards. The basal  
678 centrosome only relocalizes Polo but directly upregulates Cnb on the daughter centriole. Cnb's  
679 relocalization most likely entails both down and upregulation in prophase/prometaphase and upregulation  
680 in anaphase/telophase, respectively (vertical orange arrows), as well as direct protein transfer (curved  
681 arrows). Plp (green) remains on the mother, potentially increasing in intensity and appearing on the  
682 daughter centriole in prometaphase. Centriolar protein relocalization is mostly completed by anaphase.  
683 The centriole containing less Plp, gained Cnb and Polo and is destined to be inherited by the self-renewed  
684 neuroblast (indicated with 'neuroblast fate') in the next division, whereas the centriole containing higher  
685 Plp and lower Polo levels is destined to be inherited by the GMC (indicated with 'GMC fate'). The fate of  
686 the basal centrioles and subsequent marker distribution is unknown (represented by grey circles). (c) Cnb  
687 and Polo co-depend on each other for their relocalization from the mother to the daughter centriole.  
688 Wdr62 is necessary for Polo relocalization albeit the molecular mechanism is unclear. Time scale is  
689 mm:ss or hh:mm:ss. Scale bar is 5µm.

690 **Supplementary Figure legends**

691

692 **Supplementary Fig.1.: Centriole duplication completes during mitosis in larval neuroblasts**

693 **(a)** Current model of centrosome asymmetry in neuroblast. The Cnb<sup>+</sup> apical daughter centrosome is active  
694 throughout interphase and constantly nucleates a robust microtubule array, maintaining its position at the  
695 apical neuroblast cortex (blue crescent). The Cnb<sup>-</sup> basal mother centrosome is inactive during interphase,  
696 diffusing through the cytoplasm until it regains MTOC activity in prophase. At this point, the Cnb<sup>-</sup>  
697 centrosome reached the basal side of the neuroblast and starts to reaccumulate Cnb during mitosis. The  
698 daughter centrosome is retained by the neuroblast and the mother centrosome is inherited by the  
699 differentiating GMC. Asymmetric centrosomes split in early interphase. **(b)** Representative 3D-SIM  
700 images of neuroblasts expressing the pericentriolar marker Cnn::GFP stained for  $\alpha$ -Tubulin, labelling  
701 microtubules (MTs; green). The morphology of the microtubule array and cell shape were used to define  
702 neuroblast cell cycle stages. **(c)** Neuroblast centrosomes are inherently asymmetric in interphase but when  
703 neuroblast centrioles duplicate and acquire a unique molecular identity (indicated by arrow and color  
704 switch) is unknown. **(d)** Representative interpolated 3D-SIM images of third instar larval neuroblast  
705 centrosomes, expressing Sas-6::GFP (top row; white. Green in merge) and stained for Asl (middle row;  
706 white. Merged channels; red). The yellow arrowhead highlights the cartwheel of the forming centriole.  
707 Cartwheel duplication can be observed at the telophase/interphase transition, concomitantly with  
708 centrosome separation (blue arrowhead). Cell cycle stages are indicated with colored boxes. Scale bar is 3  
709  $\mu$ m in (b) and 0.3  $\mu$ m in (d).

710

711 **Supplementary Fig.2.: Cnb's relocalization is controlled by Polo-dependent phosphorylation**

712 Representative 3D-SIM images of the **(a)** first and **(b)** second centrosome of a *polo* mutant (*polo<sup>1</sup>/polo<sup>16-</sup>*  
713 <sup>1</sup>) third instar larval neuroblast expressing YFP::Cnb (white; middle row, green; bottom row) and stained  
714 for Asl (white; top row, magenta; bottom row). *polo* mutant neuroblasts show a loss of MTOC activity

715 during interphase, which randomizes centrosome positioning and distribution. Since we cannot  
716 distinguish between the ‘apical’ and ‘basal’ centrosomes anymore we refer to centrosome 1 and 2 instead.  
717 Colored arrowheads and bars underneath the images highlight the degree of Cnb relocalization. Graphs  
718 showing the timeline of Cnb’s relocalization at defined mitotic stages in **(c)** control (*polo/+*) and **(d)** *polo*  
719 mutant (*polo<sup>1</sup>/polo<sup>16-1</sup>*) neuroblasts. The bars show the percentage of neuroblasts containing a single Cnb<sup>+</sup>  
720 centriole (dark blue), a single centriole without Cnb (dark grey), Cnb on both centrioles (transition stage  
721 with a Daughter/Mother ratio < 2; light green), predominant Cnb localization on the daughter centriole  
722 (strong asymmetry with a Daughter/Mother ratio between 2 and 10; light blue) or in which Cnb is  
723 completely shifted to the daughter centriole (complete asymmetry with a Daughter/Mother ratio > 10;  
724 light brown). The localization of YFP::Cnb is shown in **(e)** control and **(f)** *polo* mutant (*polo<sup>1</sup>/polo<sup>16-1</sup>*)  
725 interphase neuroblasts. The quantification is displayed in **(g)**. This experiment was done three times.  
726 Scale bar is 0.3 μm

727

### 728 **Supplementary Fig.3.: Plp remains enriched on the mother centriole during mitosis**

729 Representative 3D-SIM images of **(a)** apical and **(b)** basal third instar larval neuroblast centrosomes,  
730 expressing Plp::EGFP (white in middle row, green in merge), co-stained with Asl (white on top, magenta  
731 in merge). Orange and yellow shapes represent mother (M) and daughter (D) centrioles respectively,  
732 based on Asl intensity. The number represents total Plp intensity ratios (Daughter/Mother centriole) in the  
733 shown image. Plp asymmetry ratios for the apical (red dots) and the basal (blue dots) centrosome are  
734 plotted in **(c)** from three independent experiments. Medians are shown in dark grey. Prometaphase: apical  
735 versus basal; p=0.3856. Metaphase: apical versus basal; p=0.2234. Anaphase: apical versus basal;  
736 p=0.3583. Telophase: apical versus basal; p=0.1844. Plp remains localized on the mother centriole on  
737 both centrosomes and enriches on the daughter centriole over time. Scale bar is 0.3 μm. Colored boxes  
738 indicate cell cycle stages.

739

740 **Supplementary Fig.4.: YFP::Cnb::PACT expression impairs complete Cnb relocalization from the**  
741 **mother to the daughter centriole, affecting interphase MTOC activity**

742 (a) Representative 3D-SIM images of third instar larval neuroblast centrosomes, expressing  
743 YFP::Cnb::PACT (white in the second row, green in the merge) and stained for Asl (white in the first  
744 row, magenta in the merge). The number represents total YFP::Cnb::PACT intensity ratios  
745 (Daughter/Mother centriole) in the shown image. YFP::Cnb::PACT intensity ratios (Daughter/Mother  
746 centriole) are plotted in (b). (c) Representative live cell imaging series from a neuroblast, recorded in the  
747 intact brain, expressing the microtubule marker mCherry::Jupiter (MTs, first row) and YFP::Cnb::PACT  
748 (second row). Red and blue squares represent apical and basal centrosome respectively. 3D-SIM and live  
749 imaging experiments were performed two times each. “00:00” corresponds to the telophase of the first  
750 division. Cell cycle stages are indicated with colored boxes. Yellow “D” and orange “M” refer to  
751 Daughter and Mother centrioles based on Asl intensity. Timestamps are shown in hh:mm and scale bar is  
752 0.3 $\mu$ m (a) and 3  $\mu$ m (c).

753

754 **Supplementary Fig.5.: Perturbing centriolar asymmetry by tethering the GFP-trapping nanobody**  
755 **to the mother centriole**

756 (a) To test the function of centriolar asymmetry establishment, the relocalization of Polo and Cnb needs  
757 to be perturbed. (b) Nanobody technology was used to prevent the centrosome asymmetry switch for  
758 selected proteins of interest. The vhhGFP4 nanobody specifically traps GFP or YFP tagged proteins. By  
759 tethering the nanobody preferentially to the mother centriole - using Plp’s PACT domain (c), we can  
760 perturb the relocalization of GFP or YFP tagged centrosomal proteins. Crossed-out arrows illustrate a  
761 lack of centriolar protein relocalization (shown for Polo; blue). Representative live cell image series from  
762 intact brains for neuroblasts expressing the microtubule marker mCherry::Jupiter (first row) and  
763 PACT::VhhGFP4 together with (d) YFP::Cnb, (f) Asl::GFP and (h) GFP::Polo transgene (genomic  
764 rescue construct; see methods). MTOC phenotype quantifications are shown for (e) YFP::Cnb, (g)  
765 Asl::GFP and (i) GFP::Polo (blue; wild type-like asymmetry, dark brown; loss of MTOC activity, light

766 brown; gain of MTOC activity). “00:00” corresponds to telophase of the first division. Cell cycle stages  
767 are indicated with colored boxes. The data presented here were obtained from two, four and three  
768 independent experiments for YFP::Cnb, Asl::GFP and GFP::Polo respectively. Timestamps are hh:mm  
769 and scale bar is 3 $\mu$ m.

770 **Supplementary Fig.6.: Establishment of centriolar asymmetry is required for biased interphase**  
771 **MTOC activity and centrosome positioning.**

772 **(a)** Representative 3D-SIM images of third instar larval neuroblast centrosomes, expressing Polo::EGFP  
773 (generated by CRISPR/Cas9) and the nanobody construct PACT::vhhGFP4. Polo::EGFP (middle: white;  
774 merge: green) expressing neuroblasts were stained for Asl (white; top row, magenta in the merge). Polo  
775 intensity ratios (Daughter/Mother centriole) are plotted in **(b)** for control (green dots) and  
776 PACT::vhhGFP4 (purple dots). These experiments were performed two times independently in parallel  
777 for both genotypes. Medians are shown in red. Prophase: Control versus PACT::vhhGFP4;  $p=3.11 \times 10^{-4}$ .  
778 Prometaphase: Control versus PACT::vhhGFP4;  $p=3.49 \times 10^{-6}$ . Metaphase: Control versus  
779 PACT::vhhGFP4;  $p=0.0222$ . Anaphase: Control versus PACT::vhhGFP4;  $p=6.28 \times 10^{-5}$ . Telophase:  
780 Control versus PACT::vhhGFP4;  $p=0.0077$ . **(c)** Representative live cell imaging time series of a dividing  
781 control (Polo::EGFP, worGal4, UAS-mCherry::Jupiter) and **(d)** PACT::vhhGFP4 expressing  
782 (Polo::EGFP, worGal4, UAS-mCherry::Jupiter & PACT::vhhGFP4) neuroblast. The microtubule marker  
783 (MTs, first row) and Polo::EGFP (second row) are shown for two consecutive mitoses. Microtubule  
784 intensity of the apical (red line and square) and basal (blue line and square) MTOC are plotted below.  
785 “00:00” corresponds to the telophase of the first division. **(e)**. Bar graph showing the quantification of the  
786 MTOC phenotype in interphase (blue; wild type-like asymmetry, dark brown; loss of MTOC activity,  
787 light brown; gain of MTOC activity). Cell cycle length is shown in **(f)**. The cell cycle length in  
788 PACT::vhhGFP4 (purple dots) is not significantly different from the control (green dots);  $p=9727$ .  
789 Medians are shown in red. **(g)** and **(i)** represent the spindle rotation between NEBD and anaphase.  
790 Medians are displayed in dark colors (green; control. Purple; vhhGFP4 expressing neuroblasts) and the  
791 maximum rotation in light colors. Division orientation between consecutive mitoses shown for control **(h)**



792 and PACT::vhhGFP4 (**j**). (**k**) and (**l**) are representative 3D-SIM images of interphase centrosomes for  
793 control and PACT::vhhGFP4 expressing neuroblasts, respectively. The trapping of Polo::EGFP with  
794 PACT::vhhGFP4 induces two identical apical-like (in respect to MTOC activity and Polo localization)  
795 centrosomes with a strong centriolar and PCM signal. The data presented for the live imaging here were  
796 obtained from five independent experiments. Cell cycle stages are indicated with colored boxes.  
797 Yellow “D” and orange “M” refer to Daughter and Mother centrioles based on Asl intensity. Timestamps  
798 are shown in hh:mm and scale bar is 0.3 $\mu$ m (a, k, l) and 3  $\mu$ m (c, d), respectively.

799

800 **Supplementary Fig.7.: optogenetic protein relocalization is efficient on third instar larval**  
801 **neuroblast centrosomes**

802 (**a**) Representative time-lapse frames of a third instar neuroblast – imaged in an intact brain – expressing  
803 SspB::mCherry (second and third row; grey) together with iLID::PACT::GFP (cyan; top row). Light  
804 exposure regime is indicated on the top. Orange brackets and red arrowheads highlight the apical  
805 neuroblast centrosome. An unrelated mCherry particle is highlighted with the green arrowhead. Intensity  
806 ratios, displaying the ratio of centrosomal/cytoplasmic SspB::mCherry are shown below; SspB::mCherry  
807 intensity was measured along a 12-pixel wide line covering the centriole and normalized against  
808 cytoplasmic mCherry levels. Note that SspB::mCherry relocalizes from the cytoplasm to the apical  
809 centrosome within 5 seconds and relocalized back into the cytoplasm within ~ 2 minutes. (**b**)  
810 Representative Prophase time-lapse frames of third instar larval neuroblasts expressing  
811 SspB::EGFP::Polo alone (control; left) or in conjunction with iLID::PACT::HA (right).  
812 SspB::EGFP::Polo (middle row; white) appears enriched and more focused in the presence of  
813 iLID::PACT::HA and after blue light exposure. Intensity ratios, displaying the ratio of  
814 centrosomal/cytoplasmic SspB::EGFP::Polo are shown below; SspB::EGFP::Polo intensity was measured  
815 along a 12-pixel wide line covering the centriole and normalized against cytoplasmic EGFP levels. Time  
816 scale is mm:ss. Scale bar is 5 $\mu$ m.

817

818

819 **Description of Additional Supplementary Files**

820

821

822 **File Name: Supplementary Movie 1**

823 **Description:** Wild type neuroblasts expressing YFP::Cnb.

824 Wild type control larval neuroblast expressing the centriolar marker YFP::Cnb (green) and the

825 microtubule marker UAS-mCherry::Jupiter (white), driven by the neuroblast-specific worGal4 transgene.

826 Note that the daughter centriole (Cnb<sup>+</sup>) remains active and anchored to the apical cortex throughout

827 interphase. The second centrosome matures in prophase (00:39) after it reached the basal side of the cell.

828 “00:00” corresponds to telophase. Time scale is hh:mm and the scale bar is 3µm.

829

830 **File Name: Supplementary Movie 2**

831 **Description:** Wild type neuroblast expressing YFP::Cnb::PACT.

832 Larval neuroblast expressing YFP::Cnb::PACT (green) and the microtubule marker UAS-

833 mCherry::Jupiter (white), driven by the neuroblast-specific worGal4 transgene. Note that

834 YFP::Cnb::PACT is present on both centrioles. Both centrosomes remain active and anchored to the

835 apical cortex throughout interphase. Centrioles split in prophase (00:39) accompanied by a large spindle

836 rotation (00:42 - 00:45), resulting in normal asymmetric cell division. “00:00” corresponds to telophase.

837 Time scale is hh:mm and the scale bar is 3µm.

838

839 **File Name: Supplementary Movie 3**

840 **Description:** Neuroblast expressing YFP::Cnb together with centriole tethered PACT::vhhGFP4.

841 Larval neuroblast expressing the centriolar marker YFP::Cnb (green), the microtubule marker UAS-

842 mCherry::Jupiter (white) and the PACT::vhhGFP4 nanobody; both UAS lines are driven by the

843 neuroblast-specific worGal4 transgene. The PACT domain confines the nanobody predominantly to the

844 mother centriole. Both centrosomes remain active and anchored to the apical cortex throughout

845 interphase. Centrosome splitting occurs a few minutes before mitosis (00:36). “00:00” corresponds to  
846 telophase. Time scale is hh:mm and the scale bar is 3 $\mu$ m.

847

848 **File Name: Supplementary Movie 4**

849 **Description:** Neuroblast expressing Asl::GFP together with centriole tethered PACT::vhhGFP4.

850 Larval neuroblast expressing the centriolar marker Asl::GFP (green), the microtubule marker UAS-  
851 mCherry::Jupiter (white) and the PACT::vhhGFP4 nanobody; both UAS lines are driven by the  
852 neuroblast-specific worGal4 transgene. Similar to the wild type control, the daughter centriole remains  
853 active and anchored to the apical cortex throughout interphase. The mother centriole sheds its MTOC  
854 activity and moves away in early interphase (00:15). At mitotic entry (00:45), the mother centriole  
855 matures after it reached the basal side of the cell. “00:00” corresponds to telophase. Time scale is hh:mm  
856 and the scale bar is 3 $\mu$ m.

857

858 **File Name: Supplementary Movie 5**

859 **Description:** Wild type control neuroblast expressing Polo::EGFP.

860 Wild type control larval neuroblast expressing Polo::EGFP (green) engineered by CRISPR/Cas9  
861 technology and the microtubule marker mCherry::Jupiter (white). Note that the daughter centriole  
862 remains active and anchored to the apical cortex throughout interphase. The mother centriole matures at  
863 00:42 after it reached the basal cell cortex. “00:00” corresponds to telophase. Time scale is hh:mm and  
864 the scale bar is 3 $\mu$ m.

865

866 **File Name: Supplementary Movie 6**

867 **Description:** Neuroblast expressing Polo::EGFP together with centriole tethered PACT::vhhGFP4.

868 Larval neuroblast expressing Polo::EGFP (green) engineered by CRISPR/Cas9 technology, the  
869 microtubule marker mCherry::Jupiter (white) and the PACT::vhhGFP4 nanobody; both UAS lines are

870 driven by the neuroblast-specific worGal4 transgene. Both MTOCs remain active and anchored to the  
871 apical cortex throughout interphase. Centrioles split only 6 minutes before mitosis starts (00:36). The  
872 mitotic spindle rotates significantly (00:42-00:48) to realign the spindle along the internal apical – basal  
873 polarity axis and to ensure normal asymmetric cell division. “00:00” corresponds to telophase. Time scale  
874 is hh:mm and the scale bar is 3 $\mu$ m.

875

876 **File Name: Supplementary Movie 7**

877 **Description:** Neuroblast expressing GFP::Polo together with centriole tethered PACT::vhhGFP4.

878 Larval neuroblast expressing the transgene GFP::Polo (green), the microtubule marker mCherry::Jupiter  
879 (white) and the PACT::vhhGFP4 nanobody; both UAS lines are driven by the neuroblast-specific  
880 worGal4 transgene. Both MTOCs remain active and anchored to the apical cortex throughout interphase.  
881 Centrioles split only 6 minutes before mitosis starts (00:48). “00:00” corresponds to telophase. Time scale  
882 is hh:mm and the scale bar is 3 $\mu$ m.

883

884

## 885 **Methods**

### 886 **Fly Strains, Transgenes and fluorescent markers**

887 The following fly strains were used: *Cnb* RNAi (VDRC, 28651GD), *wdr62*<sup>A3-9</sup> allele<sup>19</sup>, *Df(2L)Exel8005*  
888 (a deficiency removing the entire *wdr62* locus and adjacent genes; BDSC), *worniu-Gal4*<sup>39</sup>, *pUbq-DSas-*  
889 *6::GFP*<sup>40</sup>, *Cnn::GFP*, *Polo::GFP*<sup>CC01326</sup> (protein trap line)<sup>30</sup>, *GFP::Polo* (genomic rescue construct  
890 using Polo's endogenous enhancer)<sup>36</sup>, *pUbq-Asl::GFP*<sup>41</sup>, *pUbq-YFP::Cnb*<sup>11</sup>, *YFP::Cnb*<sup>T4A,T9A,S82A</sup><sup>11</sup>, *nos-*  
891 *Cas9/Cyo* (BDSC), *y*<sup>1</sup>, *w*<sup>67c23</sup>, *P{y[+mDint2]=Crey}1b*; *D/TM3*, *Sb*<sup>1</sup> (BDSC), *y*<sup>1</sup>, *M{Act5C-Cas9.P.RFP-*  
892 *}ZH-2A*, *w*<sup>1118</sup>, *DNAIig4*<sup>169</sup> (BDSC), *worGal4*, *UAS-mCherry::Jupiter*<sup>16</sup>, *cnb*<sup>e00267</sup><sup>18</sup>, *Df(3L)ED4284* (*cnb*  
893 deficiency; BDSC), *polo*<sup>1</sup><sup>42</sup>, *polo*<sup>16-1</sup><sup>43</sup>, *pUASp-YFP::Cnb::PACT*<sup>18</sup>.

894 The following mutant alleles and transgenes were generated for this paper: *Polo::EGFP*,  
895 *SspB::EGFP::Polo*, *Plp::EGFP*, *Cnb::EGFP*, *SspB::Dendra2::Cnb*, *mCherry::Cnb::PACT*,  
896 *PACT::HA::VhhGFP*, *SspB::mCherry*, *iLID::PACT::HA*, and *iLID::PACT::GFP*.

897 Unless specified otherwise, all strains were raised on standard medium at 25°C, under a 12L:12D light  
898 cycle.

899

### 900 **Generation of transgenes using CRISPR/Cas9**

901 *Plp::EGFP*, *Polo::EGFP*, *SspB::EGFP::polo*, *SspB::Dendra2::cnb*, and *Cnb::EGFP* were generated  
902 with CRISPR/Cas9 technology. Target specific sequences with high efficiency were chosen using the  
903 CRISPR Optimal Target Finder (<http://tools.flycrispr.molbio.wisc.edu/targetFinder/>), the DRSC CRISPR  
904 finder (<http://www.flyrnai.org/crispr/>), and the Efficiency Predictor (<http://www.flyrnai.org/evaluateCrispr/>) web tools. Sense and antisense primers for these chosen sites were then cloned into pU6-  
905 BbsI-ChiRNA<sup>44</sup> between BbsI sites.

907 *Plp::EGFP* Target Site 1:

908 Sense:CTTCGAACTAGCGTCCACAAGGTC, Antisense:AAACGACCTTGTGGACGCTAGTTC

909 *Plp::EGFP* Target Site 2:

910 Sense:CTTCTGCTTATGGCTACATTTGGG, Antisense:AAACCCCAAATGTAGCCATAAGCA

911 Polo::EGFP Target Site 1:

912 Sense:CTTCGTCAGTCACCTCGGTGAATAT, Antisense AAACATATTCACCGAGGTGACTGAC

913 Polo::EGFP Target Site 1:

914 Sense:CTTCGAGACTGTAGGTGACGCATTC, Antisense:AAACGAATGCGTCACCTACAGTCTC

915 Cnb::EGFP Target Site 1:

916 Sense CTTCGCTCTATGAGACCTAAGCCT, Antisense AAACAGGCTTAGGTCTCATAGAGC

917 SspB::EGFP::polo Target Site 1:

918 Sense:CTTCGCTCTCCTTTCTTCTTTACTA, Antisense:AAACTAGTAAAGAAGAAGGAGAGC

919 SspB::Dendra2::cnb Target Site 1:

920 Sense:CTTCGGCAACCCTGTGCATCACCA), Antisense:AAACTGGTGAT GCACAGGGTTGCC)

921 To generate the replacement donor template SspB<sup>37</sup> (addgene #60416), the fluorophore (dendra2 or  
922 EGFP), and 1kb homology arms flanking the insertion site were cloned into pHD-DsRed-attP (Addgene  
923 plasmid # 51019) using Infusion technology (Takara/Clontech). Embryos expressing Act5C-Cas9  
924 (BDSC#58492) for pHD-SspB::Dendra2::Cnb-DsRed, pHD-SspB::EGFP::polo-DsRed, or *nos-Cas9*<sup>45</sup>  
925 for polo::EGFP, plp::EGFP, and cnb::EGFP, were then injected with the replacement donor plasmid and  
926 its corresponding pU6-BbsI-ChiRNA. Injections were performed either in house or by Best Gene  
927 Injection Services ([www.thebestgene.com](http://www.thebestgene.com)). Successful events were detected by DsRed-positive screening  
928 in the F1 generation. Constitutively active Cre (BDSC#851) was then crossed in to remove the DsRed  
929 marker. Positive events were then balanced, genotyped, and sequenced.

930

### 931 **Generation of nanobody and optogenetic constructs**

932 PACT::HA::vhhGFP4: The coding sequences of PACT<sup>33</sup> and vhhGFP4<sup>34,35</sup> were PCR amplified and  
933 cloned into a pUAST-attB vector using In-Fusion technology (Takara, Clontech). The HA sequence was  
934 then added using overhang PCR. The resulting construct was injected into attP flies for targeted insertion  
935 on third chromosome (VK00027, BestGene).

936 mCherry::::PACT: The coding sequences of mCherry and Cnb::937 (Cnb::::PACT<sup>11</sup>) and cloned into a pUAS-attB vector using  
938 In-Fusion technology (Takara, Clontech).The resulting construct was injected into attP flies for targeted  
939 insertion on the second chromosome (VK00018, BestGene).

940 SspB::mCherry: The coding sequence of SspB (addgene #60416) and mCherry were PCR amplified and  
941 cloned into a pUAS-attB vector using In-Fusion technology (Takara, Clontech). An AgeI site was added  
942 in the primers sequences to be inserted between SspB and mCherry. The resulting construct was injected  
943 into attP flies for targeted insertion on the third chromosome (VK00033, BestGene).

944 UAS-iLID::PACT::HA: The coding sequence of iLID (addgene #60411) and PACT<sup>33</sup> were PCR  
945 amplified and cloned into a pUAS-attB vector using In-Fusion technology (Takara, Clontech) along  
946 with a synthesized HA oligonucleotide sequence. The resulting construct was injected into attP flies for  
947 targeted insertion on the second chromosome (VK00018, BestGene).

948 UAS-iLID::PACT::GFP: The coding sequence of iLID (addgene #60411), PACT<sup>33</sup> and GFP were PCR  
949 amplified and cloned into a pUAS-attB vector using In-Fusion technology (Takara, Clontech). An XhoI  
950 site was added in the primers sequences to be inserted between iLID and PACT, and an AgeI site was  
951 added between PACT and GFP. The resulting construct was injected into attP flies for targeted insertion  
952 on the third chromosome (VK00020, BestGene).

953

## 954 **Immunohistochemistry**

955 The following antibodies were used for this study: rat anti- $\alpha$ -Tub (Serotec; 1:1000), mouse anti- $\alpha$ -Tub  
956 (DM1A, Sigma; 1:2500), rabbit anti-Asl (1:500), rabbit anti-Plp (1:1000) (gifts from J. Raff). Secondary  
957 antibodies were from Molecular Probes and the Jackson Immuno laboratory.

958 96-120h (AEL; after egg laying) larval brains were dissected in Schneider's medium (Sigma) and fixed  
959 for 20 min in 4% paraformaldehyde in PEM (100mM PIPES pH 6.9, 1mM EGTA and 1mM MgSO<sub>4</sub>).  
960 After fixing, the brains were washed with PBSBT (1X PBS, 0.1% Triton-X- 100 and 1% BSA) and then  
961 blocked with 1X PBSBT for 1h. Primary antibody dilution was prepared in 1X PBSBT and brains were



962 incubated for up to 2 days at 4 °C. Brains were washed with 1X PBSBT four times for 20 minutes each  
963 and then incubated with secondary antibodies diluted in 1X PBSBT at 4 °C, overnight. The next day,  
964 brains were washed with 1X PBST (1x PBS, 0.1% Triton-X- 100) four times for 20 minutes each and  
965 kept in Vectashield H-1000 (Vector laboratories) mounting media at 4 °C.

966

### 967 **Super-Resolution 3D Structured Illumination Microscopy (3D-SIM)**

968 3D-SIM was performed on fixed brain samples using a DeltaVision OMX-Blaze system (version 4; GE  
969 Healthcare), equipped with 405, 445, 488, 514, 568 and 642 nm solid-state lasers. Images were acquired  
970 using a Plan Apo N 60x, 1.42 NA oil immersion objective lens (Olympus) and 4 liquid-cooled sCMOs  
971 cameras (pco Edge, full frame 2560 x 2160; Photometrics). Exciting light was directed through a movable  
972 optical grating to generate a fine-striped interference pattern on the sample plane. The pattern was shifted  
973 laterally through five phases and three angular rotations of 60° for each z section. Optical z-sections were  
974 separated by 0.125 µm. The laser lines 405, 488, 568 and 642 nm were used for 3D-SIM acquisition.  
975 Exposure times were typically between 3 and 100 ms, and the power of each laser was adjusted to achieve  
976 optimal intensities of between 5,000 and 8,000 counts in a raw image of 15-bit dynamic range at the  
977 lowest laser power possible to minimize photobleaching. Multichannel imaging was achieved through  
978 sequential acquisition of wavelengths by separate cameras.

979

### 980 **3D-SIM Image Reconstruction**

981 Raw 3D-SIM images were processed and reconstructed using the DeltaVision OMX SoftWoRx software  
982 package (GE Healthcare; Gustafsson, M. G. L. 2000). The resulting size of the reconstructed images was  
983 of 512 x 512 pixels from an initial set of 256 x 256 raw images. The channels were aligned in the image  
984 plane and around the optical axis using predetermined shifts as measured using a target lens and the  
985 SoftWoRx alignment tool. The channels were then carefully aligned using alignment parameter from  
986 control measurements with 0.5 µm diameter multi-spectral fluorescent beads (Invitrogen, Thermo Fisher  
987 Scientific).

988 **Live cell imaging**

989 72-120h (AEL; after egg laying) larval brains were dissected in Schneider's medium (Sigma-Aldrich,  
990 S0146) supplemented with 10% BGS (HyClone) and transferred to 50  $\mu$ L wells (Ibidi,  $\mu$ -Slide  
991 Angiogenesis) for live cell imaging. Live samples were imaged on a Perkin Elmer spinning disk confocal  
992 system "Ultra View VoX" with a Yokogawa spinning disk unit and two Hamamatsu C9100-50 frame  
993 transfer EMCCD cameras. A 63x / 1.40 oil immersion objective mounted on a Leica DMI 6000B was  
994 used. Live cell imaging data shown in Figure 3, 6 and S7 was obtained with an Andor revolution spinning  
995 disc confocal system, consisting of a Yokogawa CSU-X1 spinning disk unit and two Andor iXon3 DU-  
996 897-BV EMCCD cameras. Either a 60x/1.4NA or 100X/1.4NA oil immersion objective mounted on a  
997 Nikon Eclipse Ti microscope was used.

998 **Fluorescence recovery after photobleaching (FRAP) experiments.**

999 The 488 nm laser line was targeted to regions of interests using Andor's FRAPPA module. ROI's  
1000 measured  $\sim 2\mu\text{m} \times 2\mu\text{m}$ . Images were acquired every 30-60s after bleaching event. EGFP intensity before  
1001 and after bleaching was measured using Imaris' "Spot" tool.

1002

1003 **Optogenetics experiments**

1004 Crosses for optogenetics experiments were reared in the dark at 25°C. Offspring from these crosses were  
1005 raised in the dark and dissected after 4 days using red filters to minimize ambient and blue light exposure.  
1006 Optogenetic trapping or relocalization was performed using 10-20% of the 488nm diode laser (50mW)  
1007 line.

1008

1009 **Centriolar Age Measurements**

1010 To determine centriolar age, Asl intensity was used as a reference. The contours of non-overlapping  
1011 centrioles were drawn in ImageJ based on Asl signal and saved as XY coordinates. Using a custom-made  
1012 MatLab code the total centriolar intensity, above background values determined by the experimenter, for

1013 Asl were calculated in the drawn centriolar areas. Total Asl intensity was then used to determine  
1014 centriolar age as daughter centrioles have lower intensity than mother centrioles. The same XY  
1015 coordinates were used to measure total pixel intensity for markers of interest (e.g Polo::GFP, Plp::EGFP).  
1016 Asymmetry ratios for markers of interest were then determined by dividing total daughter centriole  
1017 intensity with total mother centriole intensity.

1018

#### 1019 **Definition of statistical tests, sample number, sample collection, replicates.**

1020 For each experiment, the data was collected from at least 2 independent experiments. All statistical details  
1021 (replicates, n, statistical test used and p-values) for each experiment can be found in the corresponding  
1022 figure legend. Statistical analyses were performed on Prism (GraphPad software). Statistical significance  
1023 was assessed with a two-sided non-parametric Mann-Whitney test to compare ranks between two samples  
1024 with variable variances and non-Gaussian distributions. P values < 0.05 were considered significant; \*, p  
1025 < 0.05 \*\*; p < 0.01; \*\*\*, p < 0.001; \*\*\*\*, p < 0.0001.

1026

#### 1027 **Computer codes**

1028 Custom made Matlab codes used for data analysis are available upon request.

1029

#### 1030 **Data availability**

1031 The authors declare that the data supporting the findings of this study are available within the paper and  
1032 its supplementary information files.

1033

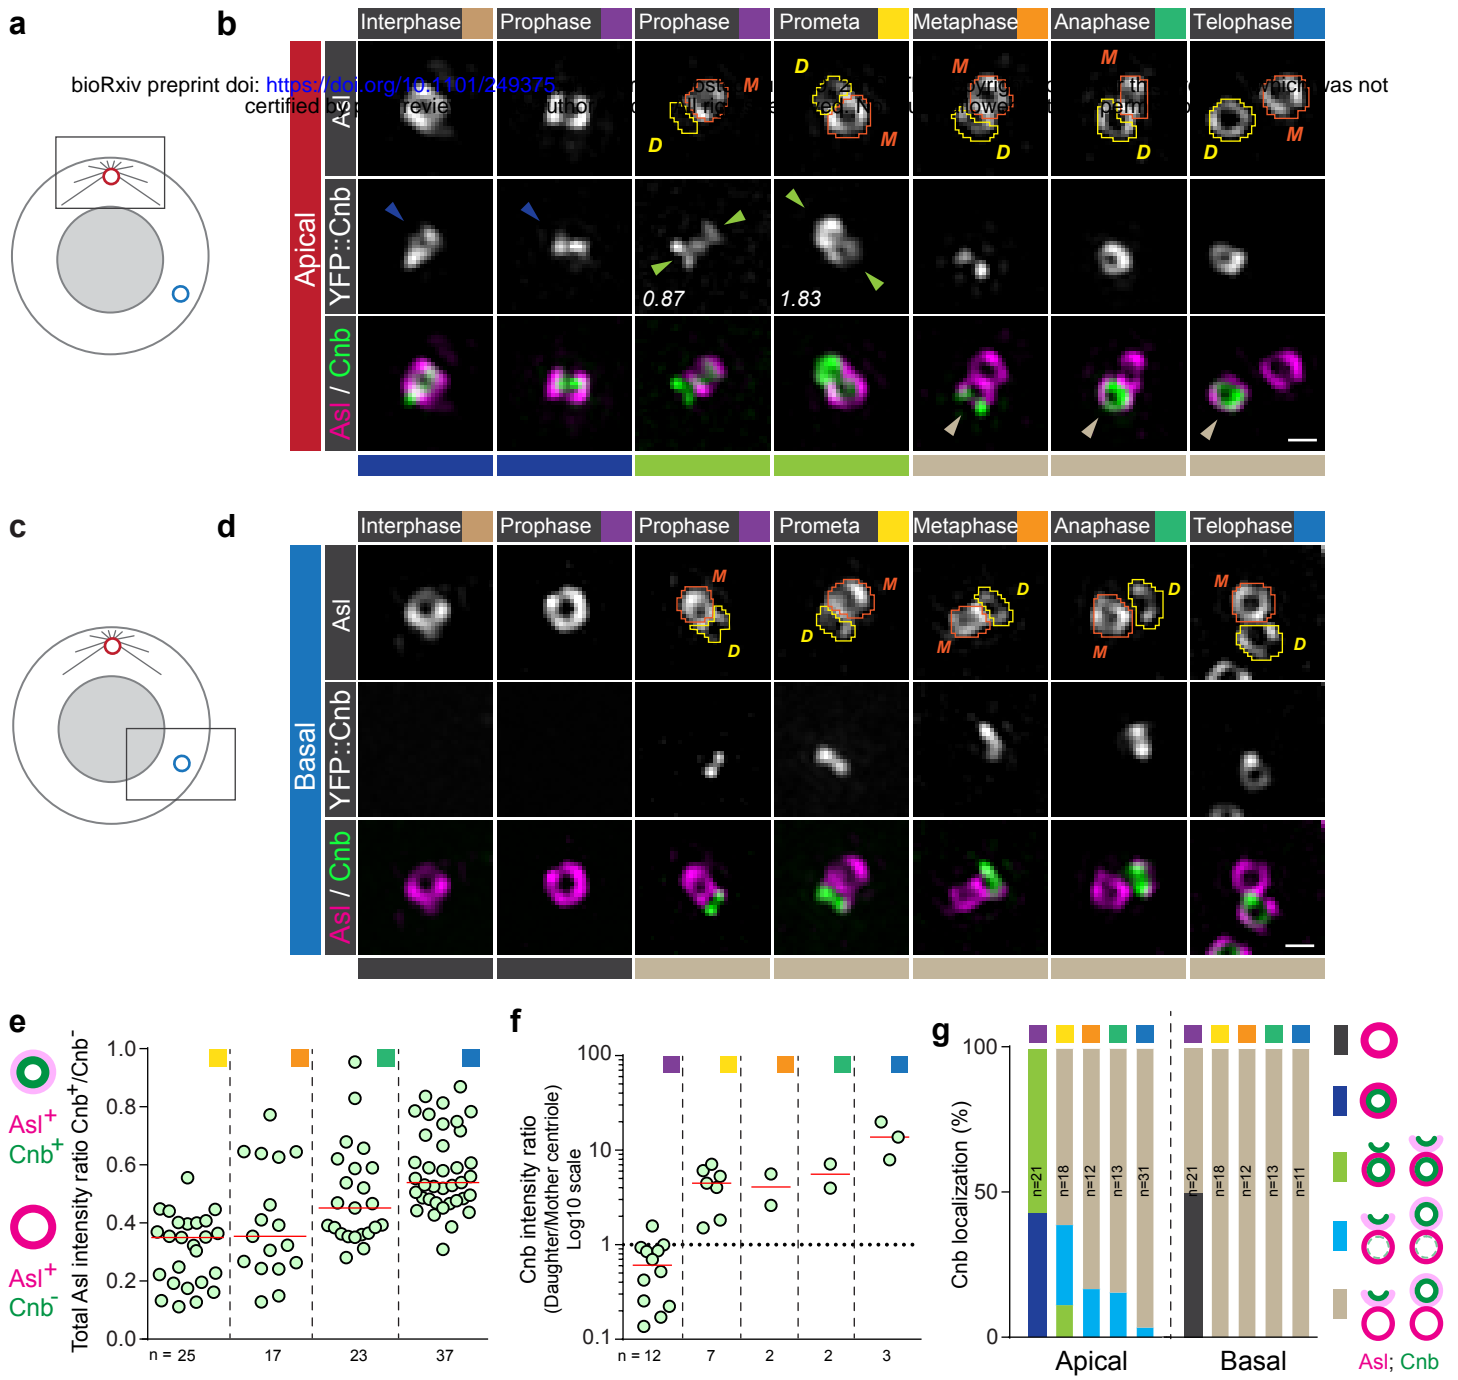

Figure 1

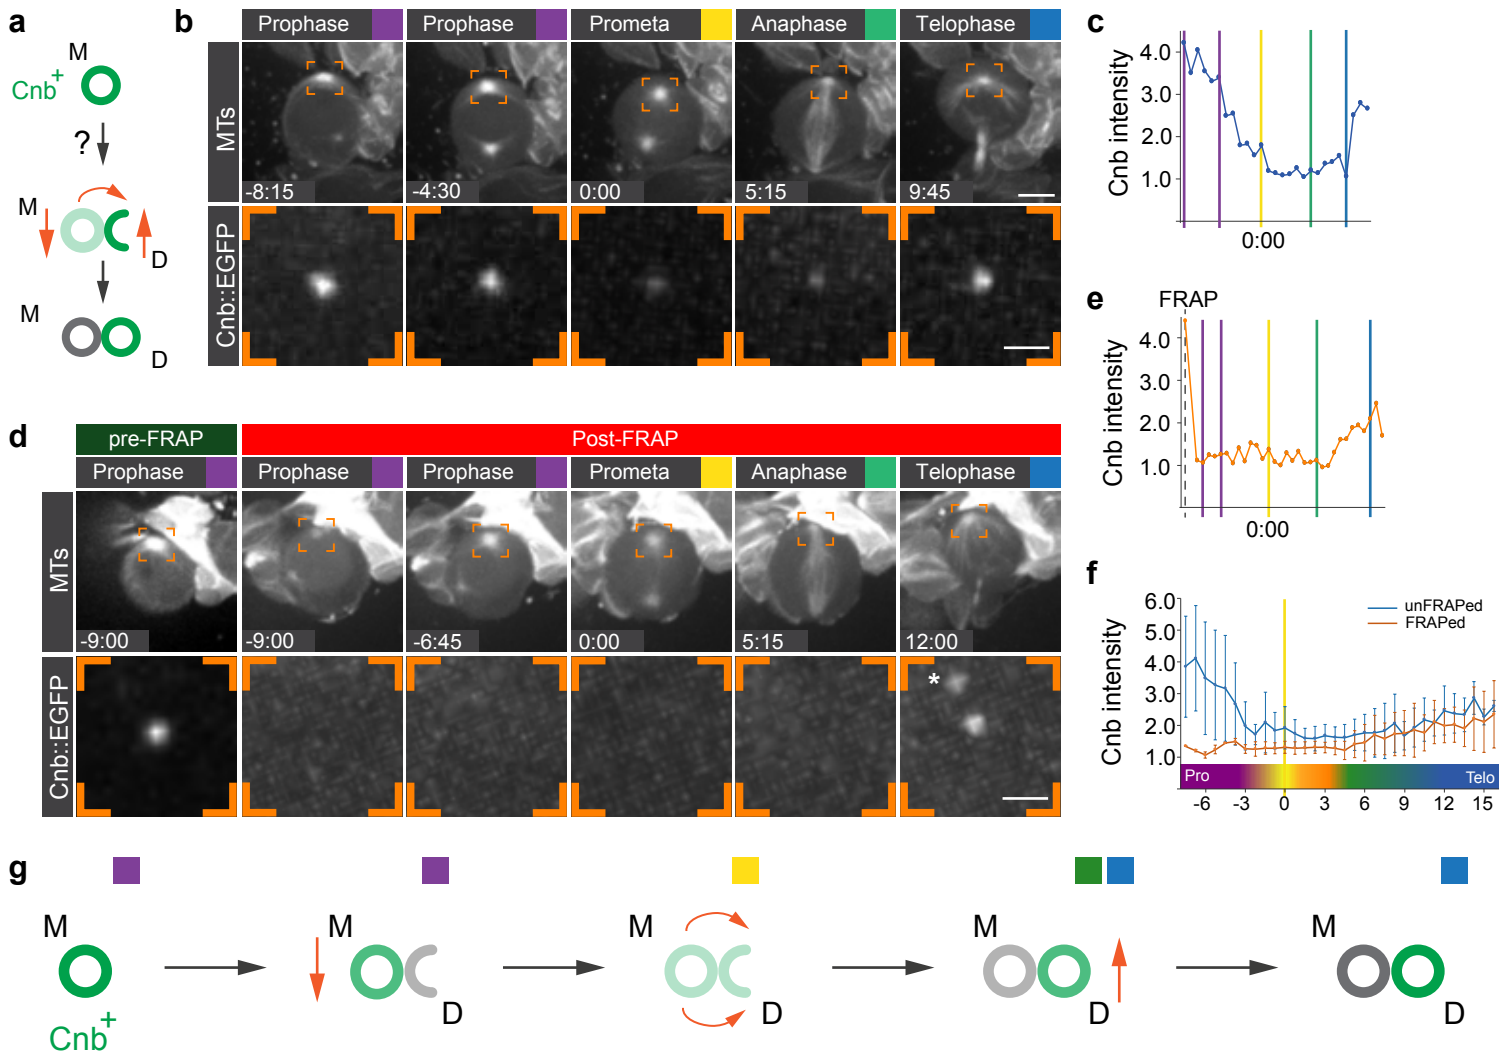

Figure 2

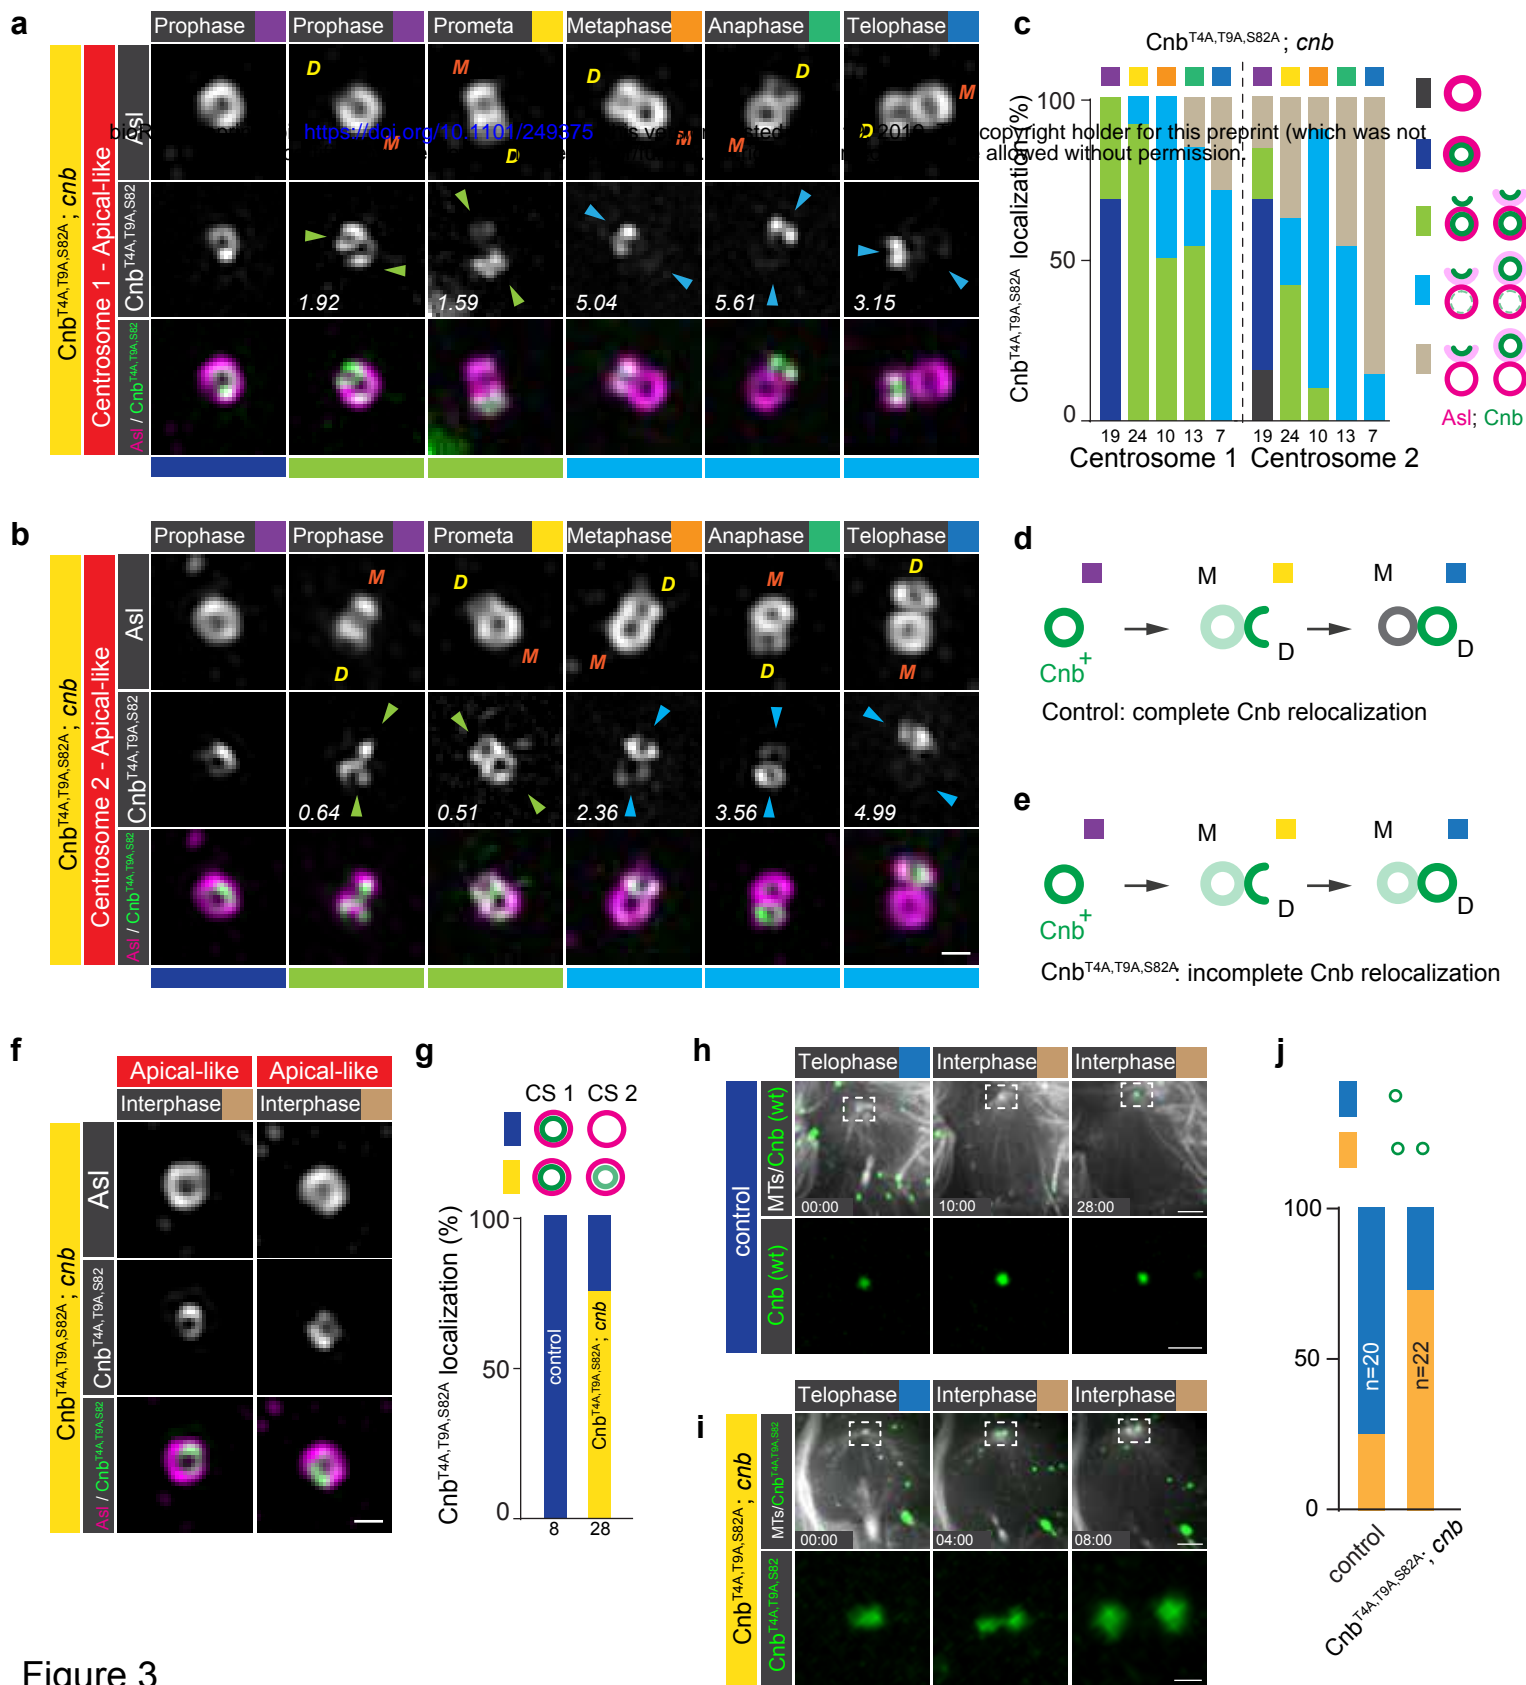

Figure 3

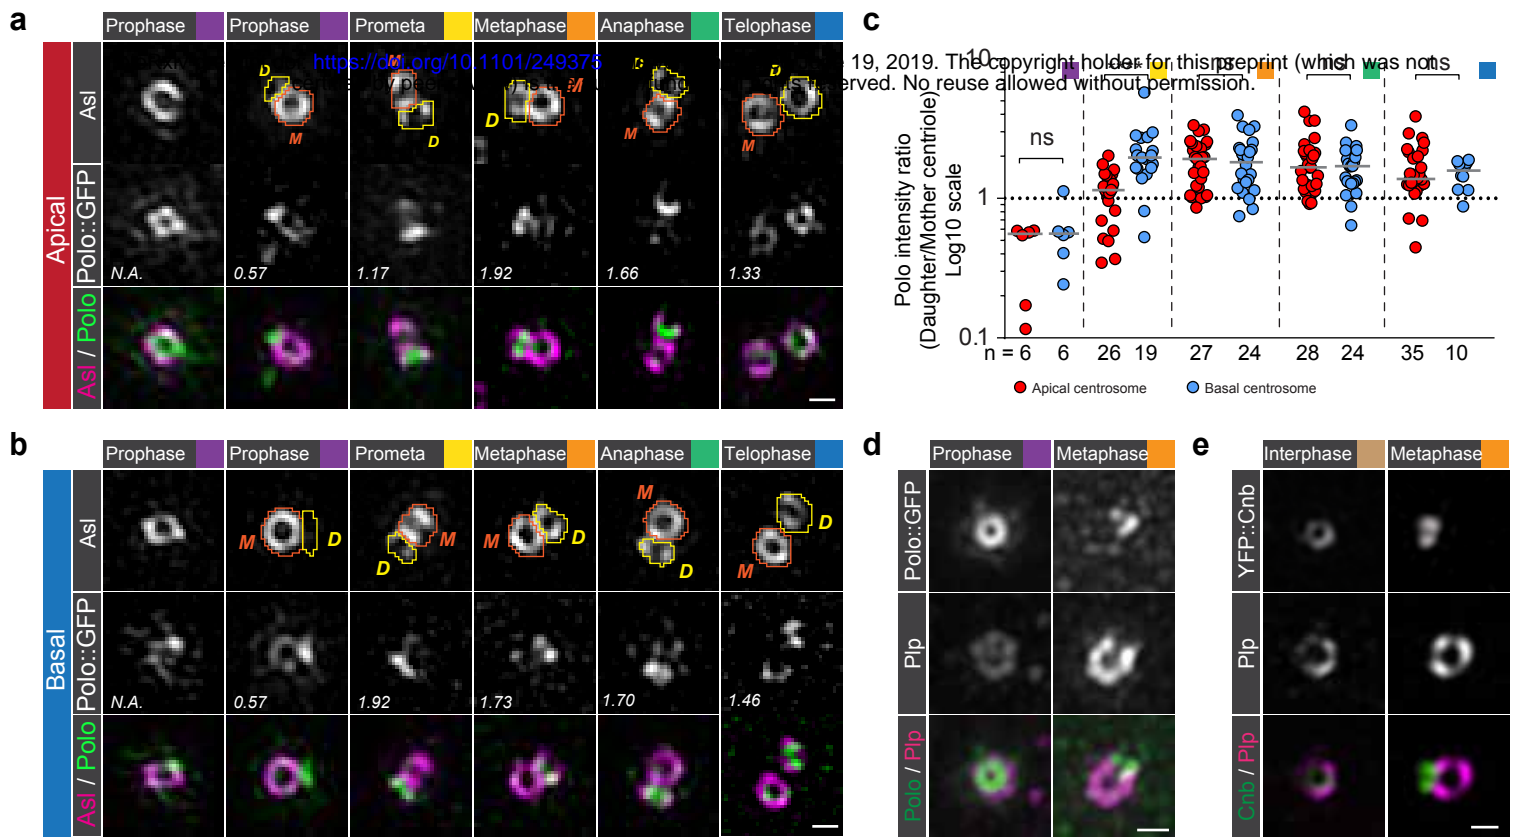

Figure 4

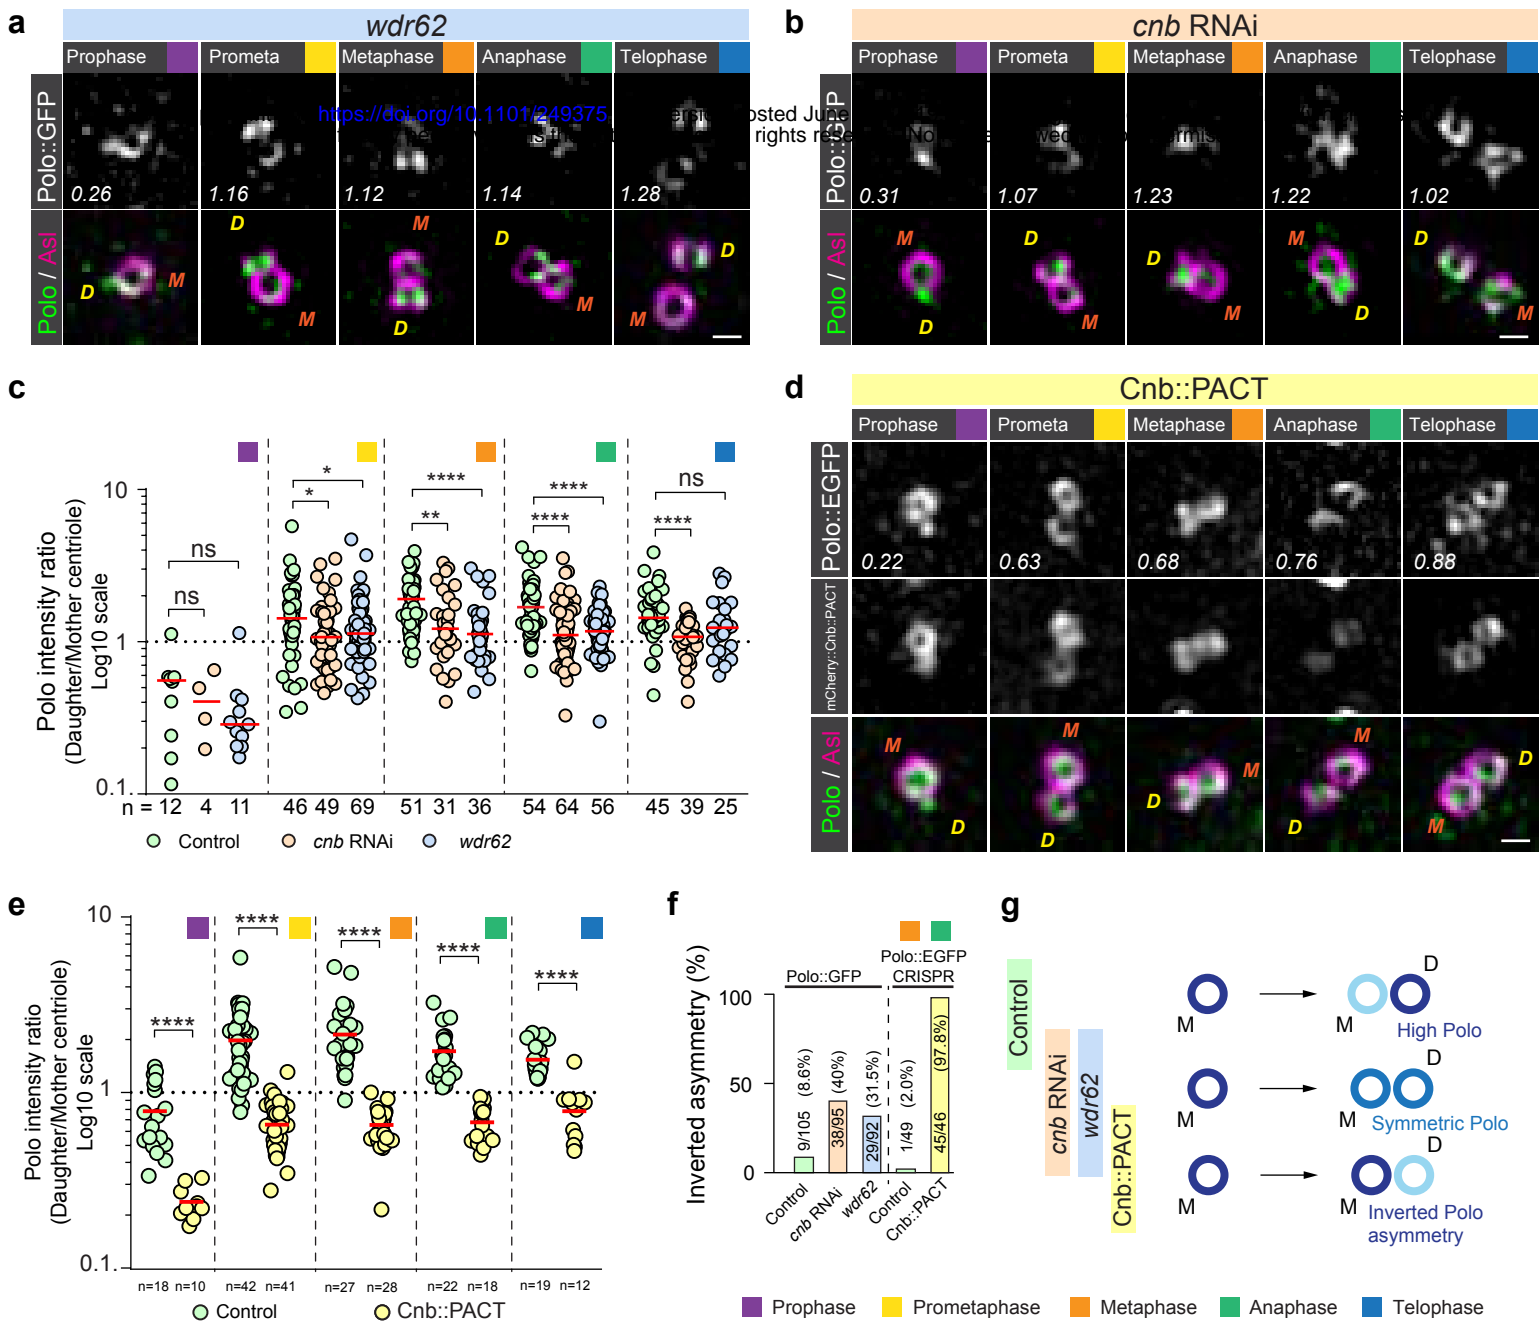

Figure 5



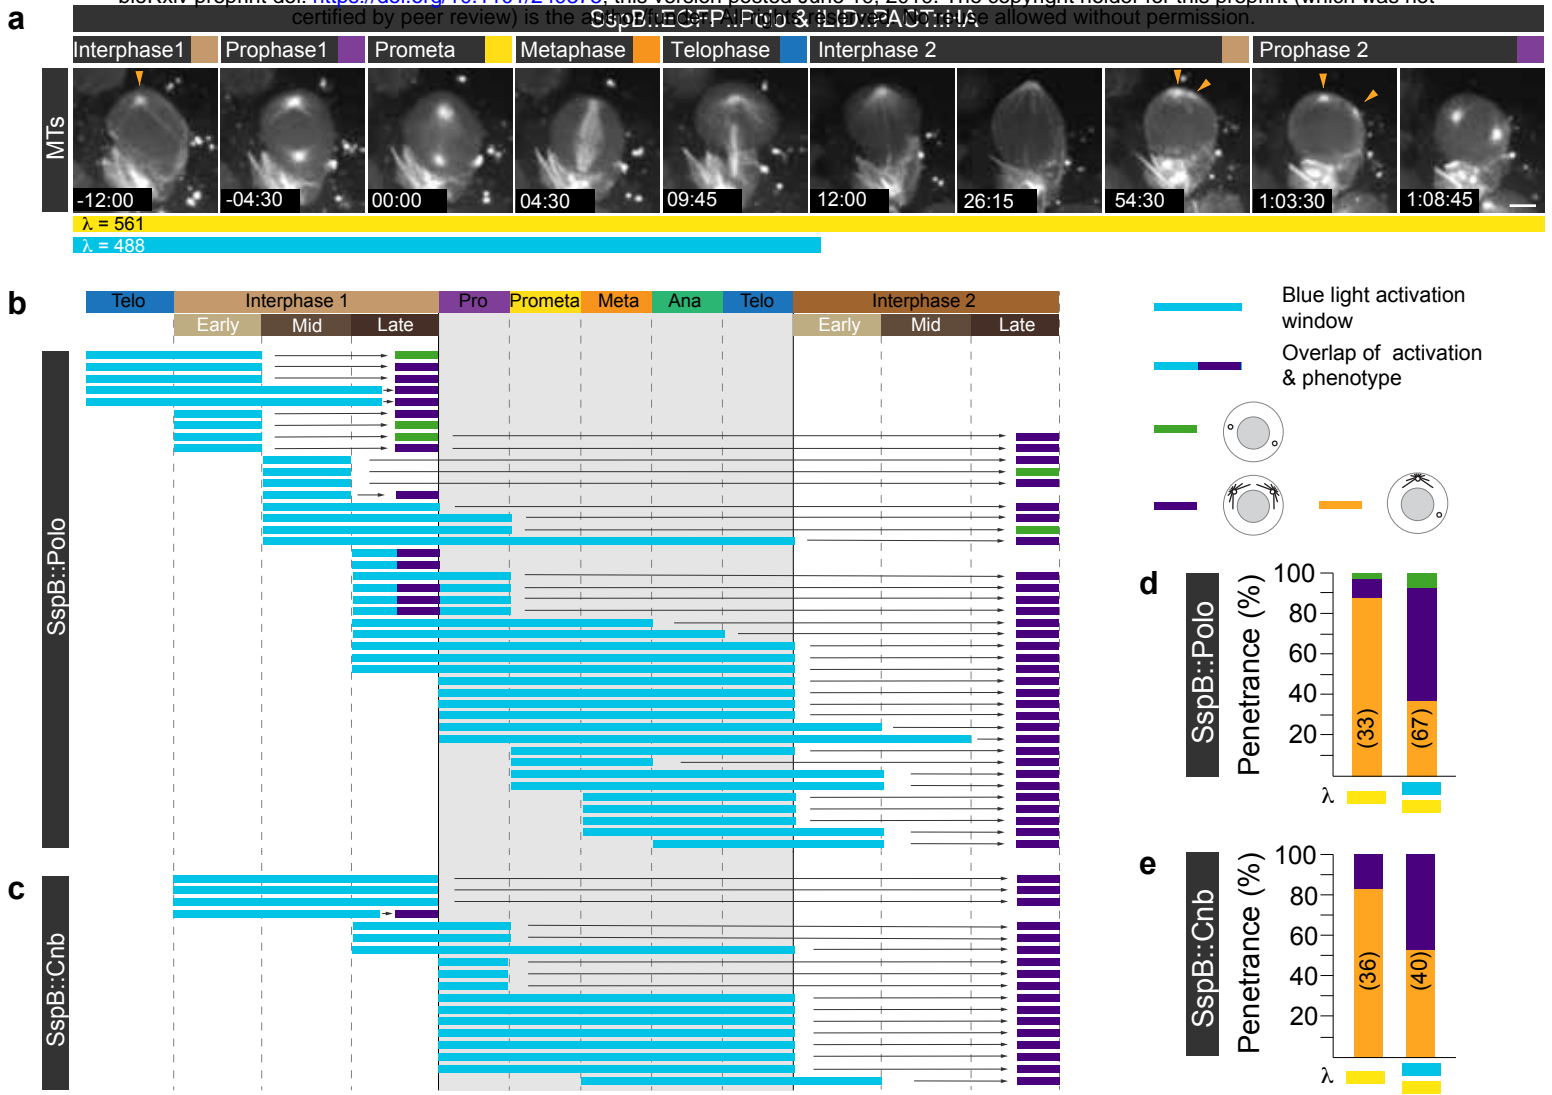

Figure 6

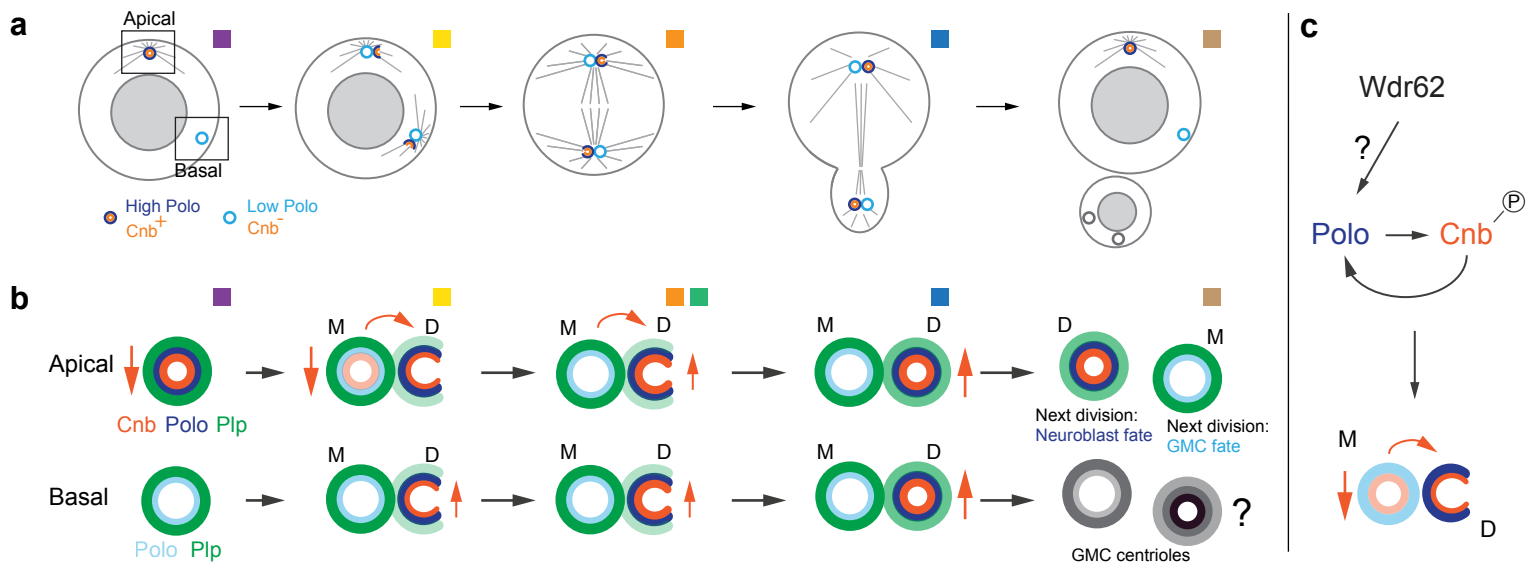

Figure 7
